# Supplementary material for: Synthesis of chiral [2,3]-fused indolines through enantioselective dearomatization inverse-electron-demand Diels–Alder reaction/oxidation of indoles with 2-(2-nitrovinyl)-1,4-benzoquinone
Source: Royal Society of Chemistry journal article supplement (doi:10.1039/d0cc00693a), 2020-01-01
Supplement: d0cc00693a1.pdf [file d0cc00693a1.pdf]

## 1. General remarks

Chemicals were purchased from commercial suppliers and used without further purification unless otherwise stated. Solvents were dried and purified according to the standard procedures before use. Reactions were monitored by TLC. Racemic products were obtained from corresponding substrates catalyzed by racemic catalyst at room temperature. Flash column chromatography was performed on silica gels (200-300 mesh).  $^1\text{H}$  NMR and  $^{13}\text{C}$  NMR (300 or 400 and 75 or 100 MHz, respectively) spectra were recorded on a Bruker 300 or 400 MHz NMR spectrometer in  $\text{CDCl}_3$ .  $^1\text{H}$  NMR chemical shifts are reported in ppm ( $\delta$ ) relative to tetramethylsilane (TMS) with the solvent resonance employed as the internal standard ( $\text{CDCl}_3$ ,  $\delta$  7.26 ppm,  $\text{DMSO-d}_6$  at 2.50 ppm, Acetone- $\text{d}_6$  at 2.05 ppm). Data are reported as follows: chemical shift, multiplicity (s = singlet, brs = broad singlet, d = doublet, t = triplet, td = triplet of doublets, q = quartet, m = multiplet), coupling constants (Hz) and integration.  $^{13}\text{C}$  NMR chemical shifts are reported in ppm from tetramethylsilane (TMS) with the solvent resonance as the internal standard ( $\text{CDCl}_3$ ,  $\delta$  77.0 ppm,  $\text{DMSO-d}_6$  at 39.51 ppm, Acetone- $\text{d}_6$  at 206.45 ppm and 29.8 ppm). All enantiomeric ratios have been controlled by co-injections of the pure sample with the racemates. HRMS data were obtained on a Bruker Daltonics. Inc mass instrument (ESI). Chiralpak AD-H column was purchased from Daicel Chemical Industries (Hong Kong, China). Optical rotations were measured on a Perkin-Elmer 241 Polarimeter. Melting points were recorded on a Buchi Melting Point B-545.

## 2. Procedures and characterizations data of compounds.

### 2.1 Synthesis of indole 1g:

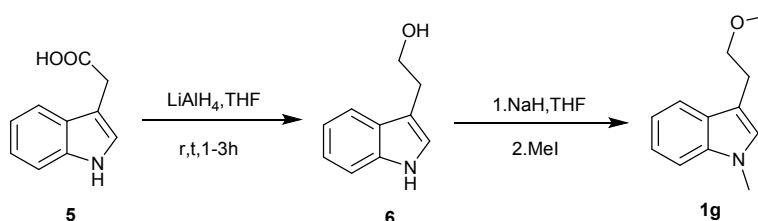

To a solution of 2-(1H-indol-3-yl)acetic acid **5** (350 mg, 2 mmol) in 10 mL of THF was added  $\text{LiAlH}_4$  (190 mg, 5 mmol) and the mixture was stirred for 1h. Then the solution was cooled in an ice bath. 50%  $\text{NaOH}$  aqueous solution (1 mL) was introduced into the mixture and the mixture was stirred for 30 mins. Then water (10 mL) was added

into the solution. The residue was dissolved in EtOAc. The organic layer was washed with water and brine, dried over anhydrous Na<sub>2</sub>SO<sub>4</sub>, filtered and concentrated under reduced pressure. The residue was purified by silica gel chromatography (EtOAc/PE = 1/2) to give the pure product **6**.

To a solution of 2-(1H-indol-3-yl)ethan-1-ol **6** (258 mg, 4 mmol) in THF (10 mL) at 0°C was added NaH (200 mg, 5 mmol) and the reaction mixture was stirred at 0°C for 30 mins. Then the mixture was added MeI (710 mg, 5 mmol) and stirred at r.t. for 1-3 h. The mixture was added CH<sub>3</sub>CO<sub>2</sub>H (1 mL) slowly. The residue was dissolved in EtOAc. The organic layer was washed with water and brine, dried over anhydrous Na<sub>2</sub>SO<sub>4</sub>, filtered and concentrated under reduced pressure. The residue was purified by silica gel chromatography (EtOAc/PE = 1/100) to give the pure product **1g** (238 mg, 1.26 mmol, 63% yield for two steps).

### 3-(2-methoxyethyl)-1-methyl-1H-indole (**1g**)

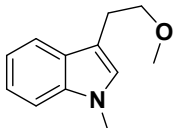 Yellow oil, <sup>1</sup>H NMR (400 MHz, CDCl<sub>3</sub>) δ 7.72 (d, *J* = 7.9 Hz, 1H), 7.35 (m, 2H), 7.27-7.18 (m, 1H), 7.00 (s, 1H), 3.85-3.74 (m, 5H), 3.51 (d, *J* = 1.4 Hz, 3H), 3.15 (t, *J* = 7.1 Hz, 2H). <sup>13</sup>C NMR (100 MHz, CDCl<sub>3</sub>) δ 137.04, 128.07, 126.89, 121.59, 118.99, 118.79, 111.52, 109.29, 73.23, 58.70, 32.62, 25.71.

## 2.2 Synthesis of indoles **1m-1p**:

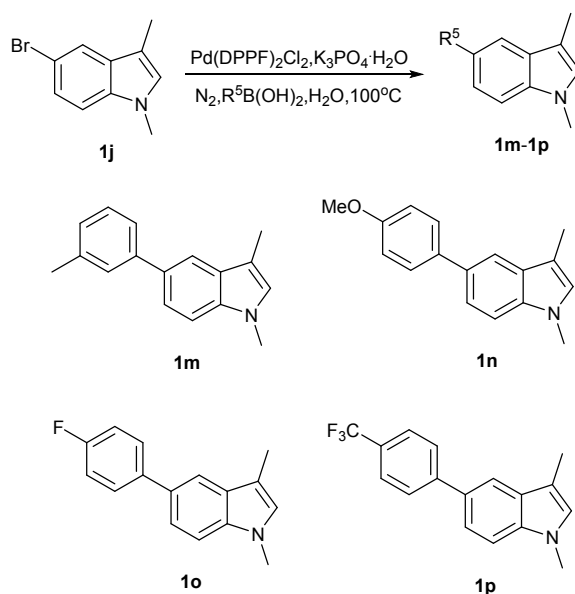

To a mixture of 5-Bromo-1,3-dimethyl-1H-indole (45 mg, 0.2 mmol),  $R^5B(OH)_2$  (0.24 mmol) and  $H_2O$  (0.01 mL) in toluene (4 mL) was added  $Pd(DPPF)_2Cl_2$  (15 mg, 0.02 mmol) and  $K_3PO_4$  (51 mg, 0.24 mmol). Then the mixture was full of nitrogen gas and heated to 100 °C under  $N_2$  for 10h. The solution was cooled to r.t.. The mixture was extracted with EtOAc. The organic layer was washed with water and brine, dried over anhydrous  $Na_2SO_4$ , filtered and concentrated under reduced pressure. The residue was purified by silica gel chromatography (EtOAc/PE = 1/100) to give the pure product (34-52% yield).

### 1,3-dimethyl-5-(*m*-tolyl)-1H-indole (1m)

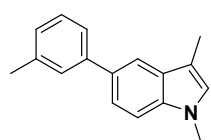

Yellow oil,  $^1H$  NMR (400 MHz,  $CDCl_3$ )  $\delta$  7.82 (d,  $J = 1.3$  Hz, 1H), 7.60–7.48 (m, 3H), 7.43–7.32 (m, 2H), 7.19 (d,  $J = 7.4$  Hz, 1H), 6.89 (s, 1H), 3.80 (s, 3H), 2.50 (s, 3H), 2.42 (s, 3H).  $^{13}C$  NMR (100 MHz,  $CDCl_3$ )  $\delta$  142.84, 138.18, 136.57, 132.28, 129.11, 128.58, 128.25, 127.20, 126.98, 124.56, 121.36, 117.55, 110.59, 109.24, 32.64, 21.66, 9.62. HRMS (ESI) Calcd. for  $C_{17}H_{17}H^+$   $[M+H]^+$  236.1439; Found: 236.1452.

### 5-(4-methoxyphenyl)-1,3-dimethyl-1H-indole (1n)

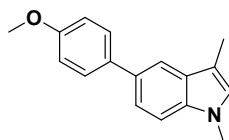

White solid, m.p: 128.1-129.3°C,  $^1H$  NMR (400 MHz,  $CDCl_3$ )  $\delta$  7.80 (d,  $J = 1.1$  Hz, 1H), 7.68 (d,  $J = 8.7$  Hz, 2H), 7.51 (dd,  $J = 8.5, 1.5$  Hz, 1H), 7.37 (d,  $J = 8.5$  Hz, 1H), 7.07 (d,  $J = 8.7$  Hz, 2H), 6.89 (s, 1H), 3.92 (s, 3H), 3.79 (s, 3H), 2.44 (s, 3H).  $^{13}C$  NMR (101 MHz,  $CDCl_3$ )  $\delta$  158.48, 136.35, 135.57, 131.89, 129.17, 128.38, 127.21, 121.13, 117.09, 114.17, 110.47, 109.27, 55.41, 32.60, 9.62. HRMS (ESI) Calcd. for  $C_{17}H_{17}NOH^+$   $[M+H]^+$  252.1388; Found: 252.1375.

### 5-(4-fluorophenyl)-1,3-dimethyl-1H-indole (1o)

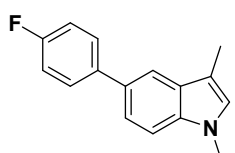

White solid, m.p: 71.2-72.3°C,  $^1H$  NMR (400 MHz,  $CDCl_3$ )  $\delta$  7.78 (d,  $J = 2.2$  Hz, 1H), 7.68 (m, 2H), 7.52-7.42 (m, 1H), 7.38 (d,  $J = 8.4$  Hz, 1H), 7.24-7.09 (m, 2H), 6.91 (s, 1H), 3.80 (s, 3H), 2.43 (d,  $J = 3.2$  Hz, 3H).  $^{13}C$  NMR (100 MHz,  $CDCl_3$ )  $\delta$  161.19 (d,  $^1J_{C-F} = 245.5$ ), 138.98, 136.54, 131.24, 129.15, 128.83 (d,  $^3J_{C-F} = 7.8$ ), 127.41, 121.16, 117.45, 115.43 (d,  $^2J$

$c_{-F} = 21.3$ ), 110.57, 109.38, 32.64, 9.61, HRMS (ESI) Calcd. for  $C_{16}H_{14}NFH^+$   $[M+H]^+$  240.1189; Found: 240.1178.

### 1,3-dimethyl-5-(4-(trifluoromethyl)phenyl)-1H-indole (1p)

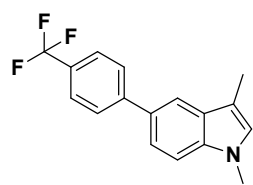

White solid, m.p: 127.6-129.1 °C,  $^1H$  NMR (400 MHz,  $CDCl_3$ )  $\delta$  7.93–7.78 (m, 3H), 7.73 (d,  $J = 8.1$  Hz, 2H), 7.52 (d,  $J = 8.4$  Hz, 1H), 7.40 (d,  $J = 8.5$  Hz, 1H), 6.92 (s, 1H), 3.80 (s, 3H), 2.42 (s, 3H).  $^{13}C$  NMR (101 MHz,  $CDCl_3$ )  $\delta$  146.35, 136.97, 130.56, 129.20, 128.16 (q,  $^2J_{C-F} = 32.1$ ), 127.62, 127.48, 127.31 (q,  $^1J_{C-F} = 268.2$ ), 125.59, 125.55, 121.11, 117.87, 110.82, 109.56, 32.65, 9.56. HRMS (ESI) Calcd for  $C_{17}H_{14}NF_3H^+$   $[M+H]^+$  290.1157; Found: 290.1139.

### 2.3 Synthesis of 2-(2-Nitrovinyl)-1,4-benzoquinone 2

2-(2-Nitrovinyl)-1,4-benzoquinone **2** was prepared according to the literature procedure<sup>1</sup>:

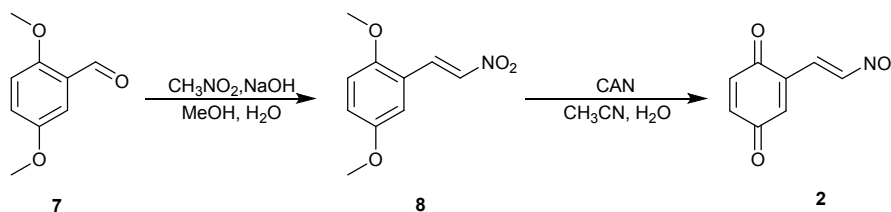

A solution of 2,5-dimethoxybenzaldehyde **7** (4 g, 24.1 mmol) and  $CH_3NO_2$  (1.4 mL, 26 mmol) in MeOH (24 mL) was cooled to 10 °C in an ice bath. A solution of NaOH (1 g, 25 mmol) in  $H_2O$  (8 mL) was added dropwise with stirring at a rate such that the temperature stayed under 15 °C for 5 mins. The reaction mixture was then poured into 5N HCl (60 mL) with stirring, and an orange precipitate formed. The precipitate was vacuum-filtered then dissolved with DCM and washed with water (30 mL  $\times$  3) and brine. The organic layer was separated and dried over  $MgSO_4$ . The mixture was subsequently filtered and the solvents were removed in vacuo to give the product 1,4-dimethoxy-2-(2-nitrovinyl)benzene (4.8 g, 23 mmol) which was used directly in the next step.

A solution of ceric ammonium nitrate (28 g, 51 mmol) in 3:1  $H_2O/CH_3CN$  (48 mL) was poured into a solution of 1,4-dimethoxy-2-(2-nitrovinyl)benzene (4.8 g, 23

mmol) in CH<sub>3</sub>CN (120 mL). The mixture was stirred for 5 min and then washed with brine (25 mL), and the brine layer was extracted with CH<sub>3</sub>CN (25 mL × 2). The CH<sub>3</sub>CN fractions were combined and concentrated under 28 °C. The residue was dissolved with DCM (120 mL) and washed with water (50 mL), the water layer was extracted with DCM (50 mL). The organic layer was combined and washed with water (25 mL). Then the solution was dried over MgSO<sub>4</sub>, filtered and concentrated under reduced pressure. The residue was crystallized from THF/heptane, giving the product 2-(2-nitrovinyl)-1,4-benzoquinone **2** as an orange needles (2 g, 11 mmol, 46% yield for two steps).

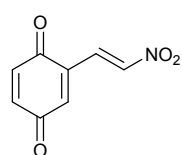

**(E)-2-(2-nitrovinyl)cyclohexa-2,5-diene-1,4-dione (2):** <sup>1</sup>H NMR (400 MHz, CDCl<sub>3</sub>) δ 8.11 (d, *J* = 13.7 Hz, 1H), 7.64 (d, *J* = 13.7 Hz, 1H), 7.01 (m, 1H), 6.95–6.84 (m, 2H). <sup>13</sup>C NMR (101 MHz, CDCl<sub>3</sub>) δ 186.16, 184.86, 144.45, 137.96, 137.43, 136.80, 136.41, 130.23.

#### 2.4 Asymmetric D-A reaction/oxidation of indoles **1** with 2-(2-Nitrovinyl)-1,4-benzoquinone **2**:

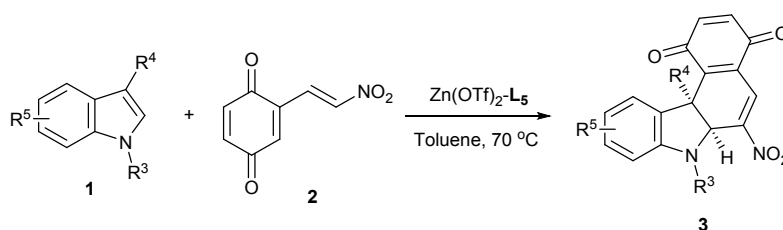

To a solution of Zn(OTf)<sub>2</sub> (3.6 mg, 0.01 mmol) in toluene (2 mL) at 25 °C was added L<sub>5</sub> (8.3 mg, 0.0167 mmol) and the reaction mixture was stirred for 2h at 25 °C. Then indole **1** (0.1 mmol) was added and the mixture was stirred at 70 °C for 10 minutes. Then 2-(2-nitrovinyl)-1,4-benzoquinone **2** (39.7 mg, 0.22 mmol) was added and the mixture was stirred at 70 °C for indicated time. The reaction mixture was cooled to r.t. and purified by flash column chromatography (EtOAc/PE = 1/20) to give the product **3**.

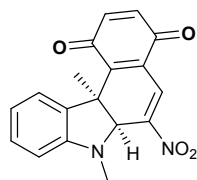

**(6aS,11bS)-7,11b-dimethyl-6-nitro-7,11b-dihydro-1H-benzo[c]carbazole-1,4(6aH)-dione (3a):** black-blue solid, m.p: 159.1-161.2 °C, 99% yield (31.9 mg), 88% ee, HPLC condition: Chiralpak OD-H (*n*-hexane/isopropan-ol: 90/10, 1.0 mL/min,  $t_{\text{major}} = 11.037$  min,  $t_{\text{minor}} = 18.735$  min).  $[\alpha]_{\text{D}}^{20} = +4.7$  (c 0.01, acetonitrile).  $^1\text{H}$  NMR (300 MHz,  $\text{CDCl}_3$ )  $\delta$  8.31 (s, 1H), 7.80 (d,  $J = 7.6$  Hz, 1H), 7.17 (t,  $J = 7.7$  Hz, 1H), 6.90 (t,  $J = 7.5$  Hz, 1H), 6.74 (m, 2H), 6.55 (d,  $J = 7.9$  Hz, 1H), 4.41 (d,  $J = 1.0$  Hz, 1H), 2.65 (s, 3H), 1.69 (s, 3H).  $^{13}\text{C}$  NMR (75 MHz,  $\text{CDCl}_3$ )  $\delta$  185.40, 183.31, 152.67, 148.57, 143.94, 139.02, 134.79, 131.84, 128.59, 128.45, 128.02, 124.84, 120.25, 107.46, 69.66, 50.85, 34.51, 22.13. HRMS (ESI) Calcd. for  $\text{C}_{18}\text{H}_{14}\text{N}_2\text{O}_4\text{Na}^+$   $[\text{M}+\text{Na}]^+$  345.0851; Found: 345.0870.

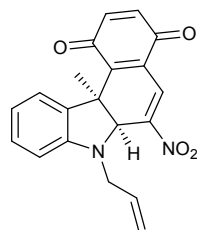

**(6aS,11bS)-7-allyl-11b-methyl-6-nitro-7,11b-dihydro-1H-benzo[c]carbazole-1,4(6aH)-dione (3b):** black-blue solid, m.p: 142.0-143.9 °C, 34% yield (11.8 mg), 71% ee, HPLC condition: Chiralpak OD-H (*n*-hexane/ isopropanol: 70/30, 1.0 mL/min,  $t_{\text{major}} = 10.957$  min,  $t_{\text{minor}} = 18.140$  min).  $[\alpha]_{\text{D}}^{20} = +3.5$  (c 0.01, acetonitrile).  $^1\text{H}$  NMR (300 MHz,  $\text{CDCl}_3$ )  $\delta$  8.25 (d,  $J = 1.3$  Hz, 1H), 7.79 (d,  $J = 7.6$  Hz, 1H), 7.14 (dd,  $J = 11.0, 4.4$  Hz, 1H), 6.87 (t,  $J = 7.5$  Hz, 1H), 6.75 (m, 2H), 6.54 (d,  $J = 7.9$  Hz, 1H), 5.79 (m, 1H), 5.34–5.06 (m, 2H), 4.67 (d,  $J = 1.1$  Hz, 1H), 3.68 (m, 2H), 1.69 (s, 3H).  $^{13}\text{C}$  NMR (100 MHz,  $\text{CDCl}_3$ )  $\delta$  185.49, 183.42, 151.58, 148.57, 143.83, 139.16, 134.80, 132.49, 131.89, 128.33, 128.15, 128.03, 124.88, 120.02, 118.40, 108.06, 67.61, 51.19, 49.63, 22.00. HRMS (ESI) Calcd. for  $\text{C}_{20}\text{H}_{16}\text{N}_2\text{O}_4\text{H}^+$   $[\text{M}+\text{H}]^+$  349.1188; Found: 349.1178.

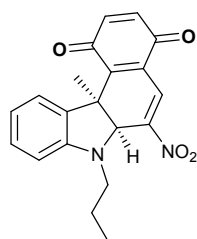

**(6aS,11bS)-11b-methyl-6-nitro-7-propyl-7,11b-dihydro-1H-benzo[c]carbazole-1,4(6aH)-dione (3c):** black-blue solid, m.p: 191.0-192.3 °C, 80% yield (28.2 mg), 37% ee, HPLC condition: Chiralpak AD-H (*n*-hexane/isopropanol: 70/30, 1.0 mL/min,  $t_{\text{major}} = 8.148$  min,  $t_{\text{minor}} = 13.841$  min).  $[\alpha]_{\text{D}}^{20} = +2.3$  (c 0.01, acetonitrile).  $^1\text{H}$  NMR (400 MHz,  $\text{CDCl}_3$ )  $\delta$  8.31 (d,  $J = 1.3$  Hz, 1H), 7.79 (dd,  $J = 7.6, 0.7$  Hz, 1H), 7.16 (m, 1H), 6.86 (m, 1H), 6.76 (m, 2H), 6.50 (d,  $J = 7.9$  Hz, 1H), 4.70 (d,  $J = 1.1$  Hz, 1H), 3.18–3.00 (m, 1H), 2.87 (m, 1H), 1.72 (s, 3H), 1.66–1.46 (m, 2H), 0.86 (t,  $J = 7.4$  Hz, 3H).  $^{13}\text{C}$  NMR (100 MHz,  $\text{CDCl}_3$ )  $\delta$  185.53, 183.43, 151.72, 148.60, 143.94, 139.18, 134.77, 131.81, 128.37, 128.13, 127.85, 124.95, 119.50, 107.24, 67.04, 51.18, 48.41,

22.13, 17.84, 11.49. HRMS (ESI) Calcd. for  $C_{20}H_{18}N_2O_4H^+$   $[M+H]^+$  351.1345; Found: 351.1349.

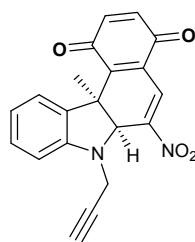

**(6aS,11bS)-11b-methyl-6-nitro-7-(prop-2-yn-1-yl)-7,11b-dihydro-1H-benzo[c]carbazole-1,4(6aH)-dione (3d):** black solid, m.p: 184.5-186.3 °C, 62% yield (21.5 mg), 63% ee, HPLC condition: Chiralpak AD-H (*n*-hexane/isopropanol: 70/30, 1.0 mL/min,  $t_{major}$  = 13.196 min,  $t_{minor}$  = 11.355 min).  $[\alpha]_D^{20} = +2.7$  (c 0.01, acetonitrile).

$^1H$  NMR (400 MHz,  $CDCl_3$ )  $\delta$  8.33 (d,  $J = 1.3$  Hz, 1H), 7.86 (dd,  $J = 7.7, 0.7$  Hz, 1H), 7.23 (m, 1H), 6.98 (m, 1H), 6.77 (m, 2H), 6.69 (d,  $J = 7.9$  Hz, 1H), 4.70 (d,  $J = 1.2$  Hz, 1H), 4.04 (dd,  $J = 18.2, 2.3$  Hz, 1H), 3.66 (dd,  $J = 18.2, 2.3$  Hz, 1H), 2.20 (s, 1H), 1.73 (s, 3H).  $^{13}C$  NMR (100 MHz,  $CDCl_3$ )  $\delta$  185.40, 183.30, 150.19, 148.36, 143.90, 139.12, 134.84, 131.85, 129.01, 128.37, 128.20, 125.30, 121.21, 109.02, 73.40, 66.87, 51.06, 36.56, 22.13. HRMS (ESI) Calcd. for  $C_{20}H_{14}N_2O_4Na^+$   $[M+Na]^+$  369.0851; Found: 369.0852.

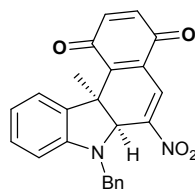

**(6aS,11bS)-7-benzyl-11b-methyl-6-nitro-7,11b-dihydro-1H-benzo[c]carbazole-1,4(6aH)-dione (3e):** black-blue solid, m.p: 145.4-147.1 °C, 66% yield (26.3 mg), 56% ee, HPLC condition: Chiralpak AD-H (*n*-hexane/isopropanol: 70/30, 1.0 mL/min,  $t_{major}$  = 7.855 min,  $t_{minor}$  = 9.605 min).  $[\alpha]_D^{20} = +2.8$  (c 0.01, acetonitrile).

$^1H$  NMR (300 MHz,  $CDCl_3$ )  $\delta$  8.16 (d,  $J = 1.3$  Hz, 1H), 7.84 (d,  $J = 7.6$  Hz, 1H), 7.25 (dd,  $J = 5.0, 1.8$  Hz, 3H), 7.20 – 7.13 (m, 2H), 7.09 (t,  $J = 7.7$  Hz, 1H), 6.90 (t,  $J = 7.5$  Hz, 1H), 6.79 (m, 2H), 6.44 (d,  $J = 7.8$  Hz, 1H), 4.79 (d,  $J = 1.2$  Hz, 1H), 4.27 (q,  $J = 16.1$  Hz, 2H), 1.73 (s, 3H).  $^{13}C$  NMR (75 MHz,  $CDCl_3$ )  $\delta$  185.43, 183.34, 152.46, 148.22, 144.07, 139.18, 137.74, 134.78, 131.82, 128.54, 128.40, 128.06, 127.99, 127.32, 126.99, 124.75, 120.15, 108.94, 107.67, 68.85, 52.08, 51.30, 21.88. HRMS (ESI) Calcd. for  $C_{24}H_{18}N_2O_4H^+$   $[M+H]^+$  399.1345; Found: 399.1331.

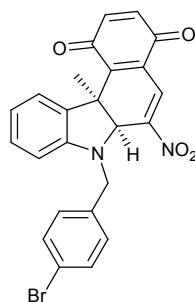

**(6aS,11bS)-7-(4-bromobenzyl)-11b-methyl-6-nitro-7,11b-dihydro-1H-benzo[c]carbazole-1,4(6aH)-dione (3f):** black-blue solid, m.p: 193.2-194.7 °C, 30% yield (14.3 mg), 51% ee, HPLC condition: Chiralpak AD-H (*n*-hexane/isopropanol: 70/30, 1.0

mL/min,  $t_{\text{major}} = 9.151\text{min}$ ,  $t_{\text{minor}} = 11.116\text{ min}$ ).  $[\alpha]_{\text{D}}^{20} = +1.4$  (c 0.01, acetonitrile).  $^1\text{H}$  NMR (300 MHz,  $\text{CDCl}_3$ )  $\delta$  8.16 (d,  $J = 1.2\text{ Hz}$ , 1H), 7.83 (d,  $J = 7.6\text{ Hz}$ , 1H), 7.36 (d,  $J = 8.4\text{ Hz}$ , 2H), 7.05 (m, 3H), 6.89 (t,  $J = 7.5\text{ Hz}$ , 1H), 6.78 (m, 2H), 6.37 (d,  $J = 7.9\text{ Hz}$ , 1H), 4.75 (s, 1H), 4.20 (s, 2H), 1.71 (s, 3H).  $^{13}\text{C}$  NMR (75 MHz,  $\text{CDCl}_3$ )  $\delta$  185.34, 183.27, 152.15, 148.14, 144.07, 139.18, 136.85, 134.81, 131.74, 131.64, 128.61, 128.43, 128.16, 128.00, 124.93, 121.07, 120.40, 107.65, 68.80, 51.56, 51.34, 21.97. HRMS (ESI) Calcd. for  $\text{C}_{24}\text{H}_{17}\text{N}_2\text{O}_4\text{BrH}^+$   $[\text{M}+\text{H}]^+$  477.0450 ( $^{79}\text{Br}$ ), 479.0429 ( $^{81}\text{Br}$ ); Found: 477.0424 ( $^{79}\text{Br}$ ), 479.0561 ( $^{81}\text{Br}$ ).

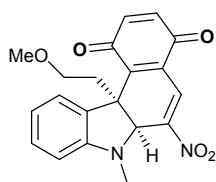

**(6aS,11bS)-11b-(2-methoxyethyl)-7-methyl-6-nitro-7,11b-dihydro-1H-benzo[c] carbazole-1,4(6aH)-dione (3g):** black-blue solid, m.p: 150.4-152.3 °C, 67% yield (24.5 mg), 31% ee, HPLC condition: Chiralpak AD-H (*n*-hexane/isopropanol: 70/30, 1.0 mL/min,  $t_{\text{major}} = 9.411\text{min}$ ,  $t_{\text{minor}} = 7.910\text{ min}$ ).  $[\alpha]_{\text{D}}^{20} = +2.0$  (c 0.01, acetonitrile).  $^1\text{H}$  NMR (300 MHz,  $\text{CDCl}_3$ )  $\delta$  8.17 (d,  $J = 1.5\text{ Hz}$ , 1H), 7.69 (d,  $J = 7.7\text{ Hz}$ , 1H), 7.16 (m, 1H), 6.86 (t,  $J = 7.6\text{ Hz}$ , 1H), 6.73 (m, 2H), 6.53 (d,  $J = 7.9\text{ Hz}$ , 1H), 4.65 (d,  $J = 1.3\text{ Hz}$ , 1H), 3.41 (m, 1H), 3.22–2.86 (m, 5H), 2.66 (s, 3H), 2.34–2.15 (m, 1H).  $^{13}\text{C}$  NMR (75 MHz,  $\text{CDCl}_3$ )  $\delta$  185.85, 183.42, 152.63, 150.69, 141.57, 138.98, 134.83, 128.47, 127.87, 122.30, 120.10, 107.25, 68.87, 58.04, 53.83, 38.15, 34.40. HRMS (ESI) Calcd. for  $\text{C}_{20}\text{H}_{18}\text{N}_2\text{O}_5\text{H}^+$   $[\text{M}+\text{H}]^+$  367.1294; Found: 367.1291.

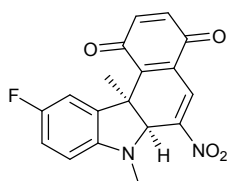

**(6aS,11bS)-10-fluoro-7,11b-dimethyl-6-nitro-7,11b-dihydro-1H-benzo[c] carbazole-1,4(6aH)-dione (3h):** black-blue solid, m.p: 191.0-192.3 °C, 79% yield (26.9 mg), 69% ee, HPLC condition: Chiralpak AD-H (*n*-hexane/isopropanol: 70/30, 1.0 mL/min,  $t_{\text{major}} = 9.827\text{min}$ ,  $t_{\text{minor}} = 8.442\text{ min}$ ).  $[\alpha]_{\text{D}}^{20} = +3.8$  (c 0.01, acetonitrile).  $^1\text{H}$  NMR (400 MHz,  $\text{CDCl}_3$ )  $\delta$  8.31 (d,  $J = 1.3\text{ Hz}$ , 1H), 7.56 (dd,  $J = 8.9, 2.6\text{ Hz}$ , 1H), 6.90–6.84 (m, 1H), 6.79 (m, 2H), 6.46 (dd,  $J = 8.6, 4.3\text{ Hz}$ , 1H), 4.42 (d,  $J = 1.3\text{ Hz}$ , 1H), 2.65 (d,  $J = 10.5\text{ Hz}$ , 3H), 1.75–1.61 (m, 3H).  $^{13}\text{C}$  NMR (100 MHz,  $\text{CDCl}_3$ )  $\delta$  185.34, 183.22, 157.56(d,  $^1J_{\text{C-F}} = 238.0$ ), 149.03, 148.52, 143.36, 138.99, 135.00, 132.11, 130.45(d,  $^3J_{\text{C-F}} = 8.6$ ), 124.92, 115.67(d,  $^2J_{\text{C-F}} = 25.6$ ), 114.81(d,  $^2J'_{\text{C-F}} = 23.4$ ), 107.79(d,  $^3J'_{\text{C-F}} = 8.2$ ), 70.09, 50.83, 35.08, 22.11. HRMS (ESI) Calcd. for  $\text{C}_{18}\text{H}_{13}\text{N}_2\text{O}_4\text{FH}^+$   $[\text{M}+\text{H}]^+$  341.0938; Found: 341.0929.



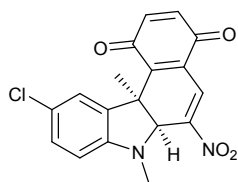

**(6aS,11bS)-10-chloro-7,11b-dimethyl-6-nitro-7,11b-dihydro-1H-benzo[c] carbazole-1,4(6aH)-dione (3i):** black-blue solid, m.p: 196.3-198.5 °C, 73% yield (26.1 mg), 75% ee, HPLC condition: Chiralpak AD-H (*n*-hexane/isopropanol: 70/30, 1.0 mL/min,  $t_{\text{major}} = 10.948$  min,  $t_{\text{minor}} = 9.200$  min).  $[\alpha]_{\text{D}}^{20} = +4.4$  (c 0.01, acetonitrile).  $^1\text{H}$  NMR (400 MHz,  $\text{CDCl}_3$ )  $\delta$  8.31 (d,  $J = 0.9$  Hz, 1H), 7.78 (d,  $J = 2.0$  Hz, 1H), 7.12 (dd,  $J = 8.4, 2.0$  Hz, 1H), 6.80 (m, 2H), 6.46 (d,  $J = 8.4$  Hz, 1H), 4.45 (d,  $J = 0.9$  Hz, 1H), 2.65 (s, 3H), 1.68 (s, 3H).  $^{13}\text{C}$  NMR (100 MHz,  $\text{CDCl}_3$ )  $\delta$  185.26, 183.18, 151.36, 148.26, 143.33, 139.04, 134.97, 132.06, 130.56, 128.42, 128.28, 125.01, 124.87, 108.32, 69.74, 50.92, 34.55, 22.11. HRMS (ESI) Calcd. for  $\text{C}_{18}\text{H}_{13}\text{N}_2\text{O}_4\text{ClH}^+$   $[\text{M}+\text{H}]^+$  357.0642 ( $^{35}\text{Cl}$ ), 359.0613 ( $^{37}\text{Cl}$ ); Found: 357.0625 ( $^{35}\text{Cl}$ ), 359.0739 ( $^{37}\text{Cl}$ ).

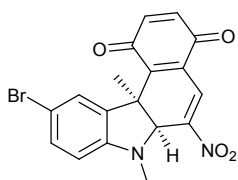

**(6aS,11bS)-10-bromo-7,11b-dimethyl-6-nitro-7,11b-dihydro-1H-benzo[c] carbazole-1,4(6aH)-dione (3j):** black-blue solid, m.p: 200.3-202.1 °C, 63% yield (25.3 mg), 64% ee, HPLC condition: Chiralpak AD-H (*n*-hexane/isopropanol: 70/30, 1.0 mL/min,  $t_{\text{major}} = 11.339$  min,  $t_{\text{minor}} = 9.493$  min).  $[\alpha]_{\text{D}}^{20} = +4.2$  (c 0.01, acetonitrile).  $^1\text{H}$  NMR (300 MHz,  $\text{CDCl}_3$ )  $\delta$  8.32 (d,  $J = 1.1$  Hz, 1H), 7.92 (d,  $J = 1.9$  Hz, 1H), 7.29–7.25 (m, 1H), 6.80 (m, 2H), 6.42 (d,  $J = 8.4$  Hz, 1H), 4.44 (d,  $J = 1.0$  Hz, 1H), 2.64 (s, 3H), 1.67 (s, 3H).  $^{13}\text{C}$  NMR (75 MHz,  $\text{CDCl}_3$ )  $\delta$  185.19, 183.14, 151.73, 148.16, 143.31, 139.02, 134.93, 131.99, 131.27, 131.02, 130.88, 124.97, 111.87, 108.85, 69.61, 50.87, 34.41, 22.07. HRMS (ESI) Calcd. for  $\text{C}_{18}\text{H}_{13}\text{BrN}_2\text{O}_4\text{H}^+$   $[\text{M}+\text{H}]^+$  401.0137 ( $^{79}\text{Br}$ ), 403.0116 ( $^{81}\text{Br}$ ); Found: 401.0134 ( $^{79}\text{Br}$ ), 403.0272 ( $^{81}\text{Br}$ ).

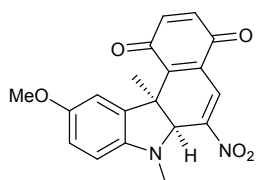

**(6aS,11bS)-10-methoxy-7,11b-dimethyl-6-nitro-7,11b-dihydro-1H-benzo[c] carbazole-1,4(6aH)-dione (3k):** black-blue solid, m.p: 145.3-147.1 °C, 99% yield (34.8 mg), 57% ee, HPLC condition: Chiralpak AD-H (*n*-hexane/isopropanol: 70/30, 1.0 mL/min,  $t_{\text{major}} = 11.664$  min,  $t_{\text{minor}} = 18.881$  min).  $[\alpha]_{\text{D}}^{20} = +4.7$  (c 0.01, acetonitrile).  $^1\text{H}$  NMR (300 MHz,  $\text{CDCl}_3$ )  $\delta$  8.29 (d,  $J = 1.3$  Hz, 1H), 7.44 (d,  $J = 2.5$  Hz, 1H), 6.74 (m, 3H), 6.47 (d,  $J = 8.5$  Hz, 1H), 4.32 (s, 1H), 3.83 (s, 3H), 2.61 (s, 3H), 1.66 (s, 3H).  $^{13}\text{C}$  NMR (75 MHz,  $\text{CDCl}_3$ )  $\delta$  185.46, 183.30, 154.41, 148.75, 147.21, 143.63, 138.97,

134.83, 131.90, 129.88, 124.80, 114.54, 113.56, 107.93, 70.22, 56.01, 50.89, 35.43, 22.09. HRMS (ESI) Calcd. for  $C_{19}H_{16}N_2O_5H^+$   $[M+H]^+$  353.1137; Found: 353.1130.

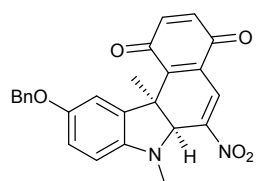

**(6aS,11bS)-10-(benzyloxy)-7,11b-dimethyl-6-nitro-7,11b-dihydro-1H-benzo[c] carbazole-1,4(6aH)-dione (3l):** black-blue solid, m.p: 204.1-205.8 °C, 29.1 mg, 68% yield (29.2 mg), 61% ee, HPLC condition: Chiralpak AD-H (*n*-hexane/isopropanol: 70/30, 1.0 mL/min,  $t_{major}$  = 13.195 min,  $t_{minor}$  = 18.861 min).  $[\alpha]_D^{20}$

= +4.2 (c 0.01, acetonitrile).  $^1H$  NMR (400 MHz,  $CDCl_3$ )  $\delta$  8.32 (d,  $J$  = 1.3 Hz, 1H), 7.55 (d,  $J$  = 2.5 Hz, 1H), 7.50 (d,  $J$  = 7.1 Hz, 2H), 7.42 (t,  $J$  = 7.3 Hz, 2H), 7.36 (d,  $J$  = 7.2 Hz, 1H), 6.80 (m, 3H), 6.49 (d,  $J$  = 8.5 Hz, 1H), 5.09 (s, 2H), 4.36 (d,  $J$  = 1.3 Hz, 1H), 2.64 (s, 3H), 1.68 (s, 3H).  $^{13}C$  NMR (100 MHz,  $CDCl_3$ )  $\delta$  185.48, 183.34, 153.61, 148.78, 147.46, 143.68, 139.01, 137.29, 134.87, 131.93, 129.88, 128.54, 127.92, 127.67, 124.85, 115.75, 114.90, 107.96, 71.07, 70.22, 50.95, 35.40, 22.17. HRMS (ESI) Calcd. for  $C_{25}H_{20}N_2O_5H^+$   $[M+H]^+$  429.1450; Found: 429.1440.

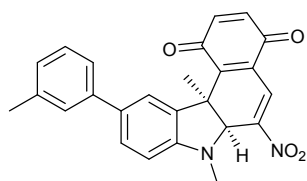

**(6aS,11bS)-7,11b-dimethyl-6-nitro-10-(m-tolyl)-7,11b-dihydro-1H-benzo[c] carbazole-1,4(6aH)-dione (3m):** black-blue solid, m.p: 115.3-116.8 °C, 90% yield (37.1 mg), 63% ee, HPLC condition: Chiralpak AD-H (*n*-hexane/isopropanol: 70/30, 1.0 mL/min,  $t_{major}$  = 10.376 min,  $t_{minor}$  = 15.988 min).  $[\alpha]_D^{20}$

= +7.2 (c 0.01, acetonitrile).  $^1H$  NMR (300 MHz,  $CDCl_3$ )  $\delta$  8.33 (d,  $J$  = 1.3 Hz, 1H), 8.06 (d,  $J$  = 1.6 Hz, 1H), 7.47-7.27 (m, 4H), 7.14 (d,  $J$  = 7.5 Hz, 1H), 6.76 (m, 2H), 6.60 (d,  $J$  = 8.2 Hz, 1H), 4.47 (d,  $J$  = 1.2 Hz, 1H), 2.69 (s, 3H), 2.45 (s, 3H), 1.74 (s, 3H).  $^{13}C$  NMR (75 MHz,  $CDCl_3$ )  $\delta$  185.40, 183.30, 152.15, 148.42, 143.83, 141.15, 139.05, 138.30, 134.78, 133.79, 131.84, 129.14, 128.66, 127.42, 127.34, 126.92, 124.96, 123.83, 107.55, 69.80, 50.93, 34.57, 22.17, 21.59. HRMS (ESI) Calcd. for  $C_{25}H_{20}N_2O_4H^+$   $[M+H]^+$  413.1501; Found: 413.1484.

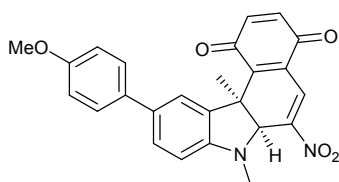

**(6aS,11bS)-10-(4-methoxyphenyl)-7,11b-dimethyl-6-nitro-7,11b-dihydro-1H-benzo[c] carbazole-1,4(6aH)-dione (3n):** black-blue solid, m.p: 203.2-204.8 °C, 63% yield (27.1 mg), 86% ee, HPLC condition: Chiralpak AD-

H (*n*-hexane/isopropanol: 70/30, 1.0 mL/min,  $t_{\text{major}} = 17.620$  min,  $t_{\text{minor}} = 30.640$  min).  $[\alpha]_{\text{D}}^{20} = +8.5$  (c 0.01, acetonitrile).  $^1\text{H NMR}$  (300 MHz,  $\text{CDCl}_3$ )  $\delta$  8.32 (d,  $J = 1.2$  Hz, 1H), 8.02 (d,  $J = 1.6$  Hz, 1H), 7.54 (d,  $J = 8.7$  Hz, 2H), 7.36 (dd,  $J = 8.1, 1.8$  Hz, 1H), 6.98 (d,  $J = 8.7$  Hz, 2H), 6.75 (m, 2H), 6.59 (d,  $J = 8.2$  Hz, 1H), 4.45 (d,  $J = 1.1$  Hz, 1H), 3.86 (s, 3H), 2.68 (s, 3H), 1.72 (s, 3H).  $^{13}\text{C NMR}$  (75 MHz,  $\text{CDCl}_3$ )  $\delta$  185.44, 183.30, 158.64, 151.79, 148.45, 143.82, 139.06, 134.78, 133.85, 133.41, 131.84, 129.15, 127.68, 126.82, 126.51, 124.95, 114.19, 107.59, 69.82, 55.34, 50.92, 34.64, 22.17. HRMS (ESI) Calcd. for  $\text{C}_{25}\text{H}_{20}\text{N}_2\text{O}_5\text{H}^+ [\text{M}+\text{H}]^+$  429.1450; Found: 429.1444.

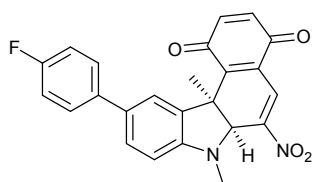

**(6aS,11bS)-10-(4-fluorophenyl)-7,11b-dimethyl-6-nitro-7,11b-dihydro-1H-benzo[c]carbazole-1,4(6aH)-dione**

**(3o)**: black-blue solid, m.p: 125.3-127.1 °C, 84% yield (34.9 mg), 64% ee, HPLC condition: Chiralpak AS-H (*n*-hexane

/isopropanol: 50/50, 1.0 mL/min,  $t_{\text{major}} = 13.460$  min,  $t_{\text{minor}} = 19.692$  min).  $[\alpha]_{\text{D}}^{20} = +7.1$  (c 0.01, acetonitrile).  $^1\text{H NMR}$  (300 MHz,  $\text{CDCl}_3$ )  $\delta$  8.33 (d,  $J = 1.2$  Hz, 1H), 8.02 (d,  $J = 1.6$  Hz, 1H), 7.56 (dd,  $J = 8.7, 5.4$  Hz, 2H), 7.35 (dd,  $J = 8.2, 1.8$  Hz, 1H), 7.12 (t,  $J = 8.7$  Hz, 2H), 6.76 (m, 2H), 6.60 (d,  $J = 8.2$  Hz, 1H), 4.47 (d,  $J = 1.2$  Hz, 1H), 2.69 (s, 3H), 1.73 (s, 3H).  $^{13}\text{C NMR}$  (75 MHz,  $\text{CDCl}_3$ )  $\delta$  185.45, 183.26, 162.03 (d,  $^1J_{\text{C-F}} = 244.0$  Hz), 152.16, 148.37, 143.70, 139.04, 137.32, 134.85, 132.65, 131.90, 129.31, 128.20, 128.09, 127.17, 126.79, 124.96, 115.55 (d,  $^2J_{\text{C-F}} = 21.2$  Hz), 107.60, 69.76, 50.90, 34.54, 22.14. HRMS (ESI) Calcd. for  $\text{C}_{24}\text{H}_{17}\text{FN}_2\text{O}_4(\text{CH}_3\text{OH})\text{H}^+ [\text{M}+(\text{CH}_3\text{OH})+\text{H}]^+$  449.1513; Found: 449.1498.

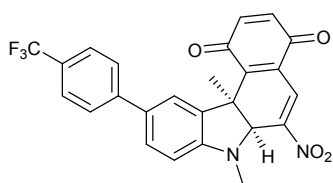

**(6aS,11bS)-7,11b-dimethyl-6-nitro-10-(4-(trifluoromethyl)phenyl)-7,11b-dihydro-1H-benzo[c]carbazole-1,4(6aH)-dione (3p)**: black-blue solid, m.p: 212.1-213.0

°C, 78% yield (36.3 mg), 62% ee, HPLC condition:

Chiralpak AD-H (*n*-hexane/isopropanol: 70/30, 1.0 mL/min,  $t_{\text{major}} = 9.460$  min,  $t_{\text{minor}} = 11.319$  min).  $[\alpha]_{\text{D}}^{20} = +5.8$  (c 0.01, acetonitrile).  $^1\text{H NMR}$  (300 MHz,  $\text{CDCl}_3$ )  $\delta$  8.35 (d,  $J = 0.9$  Hz, 1H), 8.10 (d,  $J = 1.4$  Hz, 1H), 7.81–7.63 (m, 4H), 7.45 (dd,  $J = 8.1, 1.6$  Hz, 1H), 6.79 (m, 2H), 6.64 (d,  $J = 8.2$  Hz, 1H), 4.53 (s, 1H), 2.72 (s, 3H), 1.76 (s, 3H).  $^{13}\text{C NMR}$  (75 MHz,  $\text{CDCl}_3$ )  $\delta$  185.43, 183.21, 152.83, 148.24, 144.61, 143.59, 139.05, 134.89, 131.96, 131.87, 129.52, 128.50 (q,  $^2J_{\text{C-F}} = 32.3$  Hz), 127.86, 127.61, 127.10,

126.77, 125.72, 125.67, 125.02, 124.38 (q,  $^1J_{C-F} = 270.1$  Hz), 107.65, 69.68, 50.90, 34.35, 22.15. HRMS (ESI) Calcd. for  $C_{25}H_{17}F_3N_2O_4(CH_3OH)H^+$   $[M+(CH_3OH)+H]^+$  499.1481; Found: 499.1451.

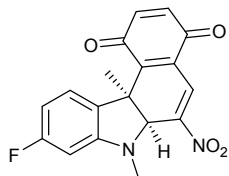

**(6aS,11bS)-9-fluoro-7,11b-dimethyl-6-nitro-7,11b-dihydro-1H-benzo[c]carbazole-1,4(6aH)-dione (3q):** black-blue solid, m.p: 175.1-177.3 °C, 65% yield (22.1 mg), 66% ee, HPLC condition: Chiralpak AD-H (*n*-hexane/isopropanol: 70/30, 1.0 mL/min,  $t_{major} = 10.546$  min,  $t_{minor} = 9.428$  min).  $[\alpha]_D^{20} = +3.7$  (c 0.01, acetonitrile).  $^1H$  NMR (400 MHz,  $CDCl_3$ )  $\delta$  8.31 (d,  $J = 1.3$  Hz, 1H), 7.71 (dd,  $J = 8.4, 5.6$  Hz, 1H), 6.78 (m, 2H), 6.54 (td,  $J = 9.1, 2.3$  Hz, 1H), 6.24 (dd,  $J = 9.7, 2.3$  Hz, 1H), 4.49 (d,  $J = 1.2$  Hz, 1H), 2.66 (d,  $J = 8.6$  Hz, 3H), 1.69 (s, 3H).  $^{13}C$  NMR (100 MHz,  $CDCl_3$ )  $\delta$  185.44, 183.26, 163.72 (d,  $^1J_{C-F} = 246.1$  Hz), 154.28 (d,  $^3J_{C-F} = 11.5$  Hz), 148.06, 143.72, 139.02, 134.92, 131.80, 129.10 (d,  $^3J'_{C-F} = 10.4$  Hz), 125.13, 123.96, 106.27 (d,  $^2J_{C-F} = 22.8$  Hz), 95.61 (d,  $^2J'_{C-F} = 27.2$  Hz), 69.85, 50.46, 34.18, 22.25. HRMS (ESI) Calcd. for  $C_{18}H_{13}N_2O_4FH^+$   $[M+H]^+$  341.0938; Found: 341.0939.

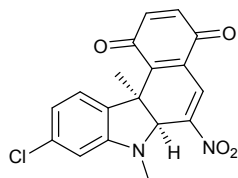

**(6aS,11bS)-9-chloro-7,11b-dimethyl-6-nitro-7,11b-dihydro-1H-benzo[c]carbazole-1,4(6aH)-dione (3r):** black-blue solid, m.p: 136.1-138.0 °C, 34% yield (12.1 mg), 55% ee, HPLC condition: Chiralpak AD-H (*n*-hexane/isopropanol: 70/30, 1.0 mL/min,  $t_{major} = 10.752$  min,  $t_{minor} = 8.353$  min).  $[\alpha]_D^{20} = +3.8$  (c 0.01, acetonitrile).  $^1H$  NMR (400 MHz,  $CDCl_3$ )  $\delta$  8.32 (d,  $J = 1.3$  Hz, 1H), 7.70 (d,  $J = 8.1$  Hz, 1H), 6.97–6.67 (m, 3H), 6.51 (d,  $J = 1.8$  Hz, 1H), 4.49 (d,  $J = 1.2$  Hz, 1H), 2.65 (s, 3H), 1.69 (s, 3H).  $^{13}C$  NMR (100 MHz,  $CDCl_3$ )  $\delta$  185.36, 183.20, 153.71, 148.06, 143.59, 139.03, 134.95, 134.71, 131.95, 128.98, 127.26, 125.11, 119.96, 107.92, 69.66, 50.60, 34.17, 22.08. HRMS (ESI) Calcd for  $C_{18}H_{13}N_2O_4ClH^+$   $[M+H]^+$  357.0642 ( $^{35}Cl$ ), 359.0613 ( $^{37}Cl$ ); Found: 357.0653 ( $^{35}Cl$ ), 359.0794 ( $^{37}Cl$ ).

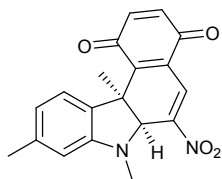

**(6aS,11bS)-7,9,11b-trimethyl-6-nitro-7,11b-dihydro-1H-benzo[c]carbazole-1,4(6aH)-dione (3s):** black-blue solid, m.p: 135.1-137.0 °C, 36% yield (12.1 mg), 61% ee, HPLC condition: Chiralpak AD-H (*n*-hexane/isopropanol: 70/30, 1.0 mL/min,  $t_{major} = 8.230$

min,  $t_{\text{minor}} = 6.709$  min).  $[\alpha]_{\text{D}}^{20} = +4.2$  (c 0.01, acetonitrile).  $^1\text{H NMR}$  (400 MHz,  $\text{CDCl}_3$ )  $\delta$  8.32 (d,  $J = 1.3$  Hz, 1H), 7.69 (d,  $J = 7.8$  Hz, 1H), 6.88–6.65 (m, 3H), 6.40 (s, 1H), 4.41 (d,  $J = 1.3$  Hz, 1H), 2.66 (s, 3H), 2.34 (s, 3H), 1.69 (s, 3H).  $^{13}\text{C NMR}$  (100 MHz,  $\text{CDCl}_3$ )  $\delta$  185.54, 183.44, 152.93, 148.65, 144.11, 139.07, 138.70, 134.79, 131.71, 127.77, 125.78, 124.91, 121.08, 108.45, 69.85, 50.58, 34.52, 22.30, 21.58. HRMS (ESI) Calcd. for  $\text{C}_{19}\text{H}_{16}\text{N}_2\text{O}_4\text{H}^+$   $[\text{M}+\text{H}]^+$  337.1188; Found: 337.1192.

## 2.5 Hydrogenation of **3n**:

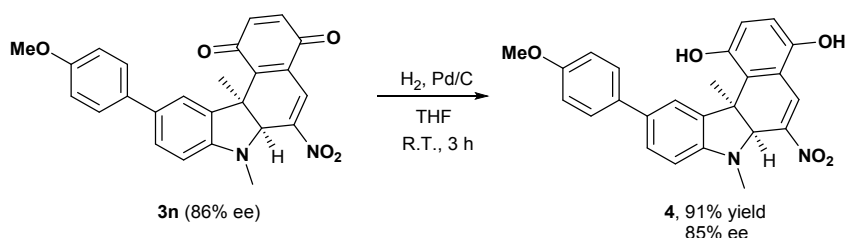

To a solution of **3n** (34.4 mg, 0.08 mmol) in THF (4 mL) at r.t. was added Pd/C (5 mg, 10%) and the mixture was stirred for 1 h at r.t. under  $\text{H}_2$ . TLC was used to monitor this reaction. Then the mixture was subsequently filtered under the protection of  $\text{N}_2$  and the solvent was removed in vacuo. The residue was purified by flash column chromatography (EtOAc/PE = 1/2) to give the pure product **4** (31.3 mg, 0.073 mmol, 91% yield, 85.4% ee).

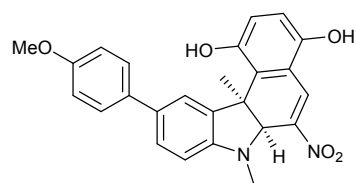

**(6aS,11bS)-10-(4-methoxyphenyl)-7,11b-dimethyl-6-nitro-6a,11b-dihydro-7H-benzo[c]carbazole-1,4-diol**

**(4)**: red solid, m.p: 252.3-254.1°C, 91% yield, 85.4% ee, HPLC condition: Chiralpak IC-H (*n*-hexane/isopropanol:

80/20, 1.0 mL/min.,  $t_{\text{major}} = 5.657$  min.,  $t_{\text{minor}} = 4.840$  min.).  $[\alpha]_{\text{D}}^{20} = +499$  (c 0.1, acetonitrile).  $^1\text{H NMR}$  (300 MHz, DMSO)  $\delta$  10.06 (s, 1H), 9.33 (s, 1H), 8.52 (d,  $J = 1.6$  Hz, 1H), 7.97 (d,  $J = 1.7$  Hz, 1H), 7.52 (d,  $J = 8.7$  Hz, 2H), 7.29 (dd,  $J = 8.1, 1.8$  Hz, 1H), 7.00 (d,  $J = 8.7$  Hz, 2H), 6.79 (d,  $J = 8.8$  Hz, 1H), 6.70 (d,  $J = 8.8$  Hz, 1H), 6.61 (d,  $J = 8.2$  Hz, 1H), 4.30 (d,  $J = 1.6$  Hz, 1H), 3.79 (s, 3H), 2.57 (s, 3H), 1.58 (s, 3H).  $^{13}\text{C NMR}$  (75 MHz, DMSO)  $\delta$  158.02, 151.68, 150.56, 147.96, 141.31, 133.93, 133.50, 130.77, 129.89, 127.17, 126.92, 125.27, 125.22, 123.48, 117.12, 115.14, 114.27,

107.71, 70.45, 55.18, 49.56, 34.58, 20.93. HRMS (ESI) Calcd. for  $C_{25}H_{22}N_2O_5H^+$   
[M+H]<sup>+</sup> 431.1607; Found: 431.1596.

References:

1. W. E. Noland and B. L. Kedrowski, *J. Org. Chem.* **1999**, *64*, 596-603.

### 3. $^1\text{H-NMR}$ spectra and $^{13}\text{C-NMR}$ spectra:

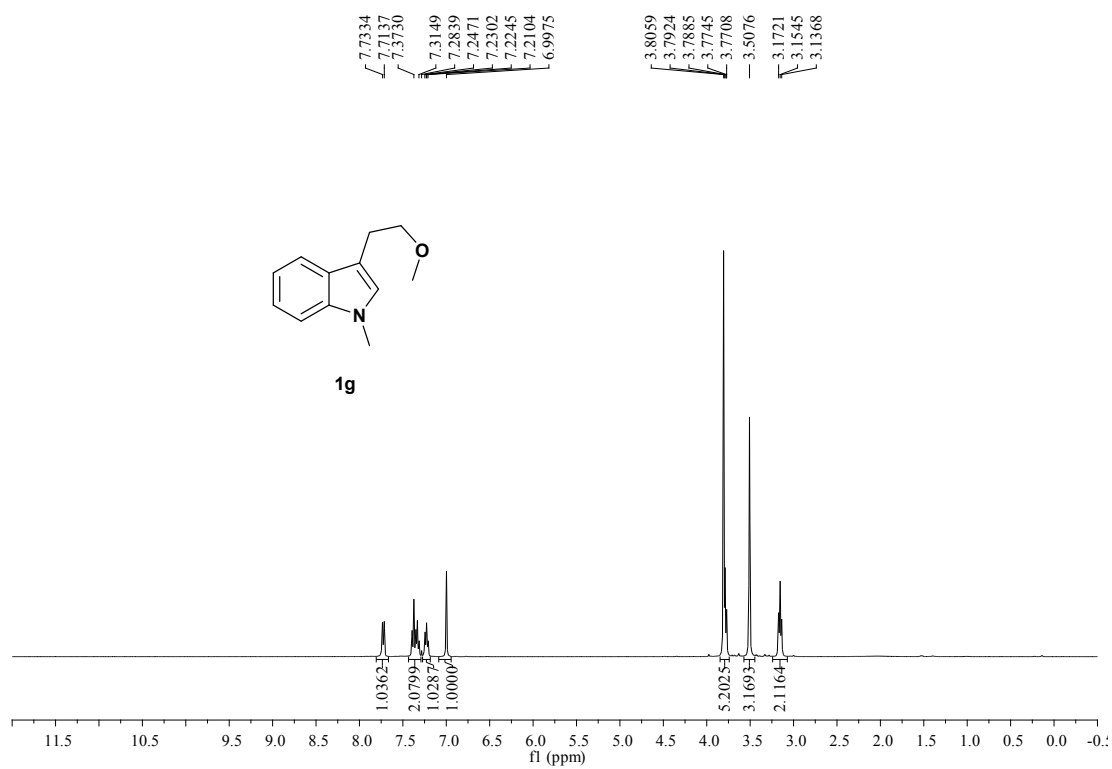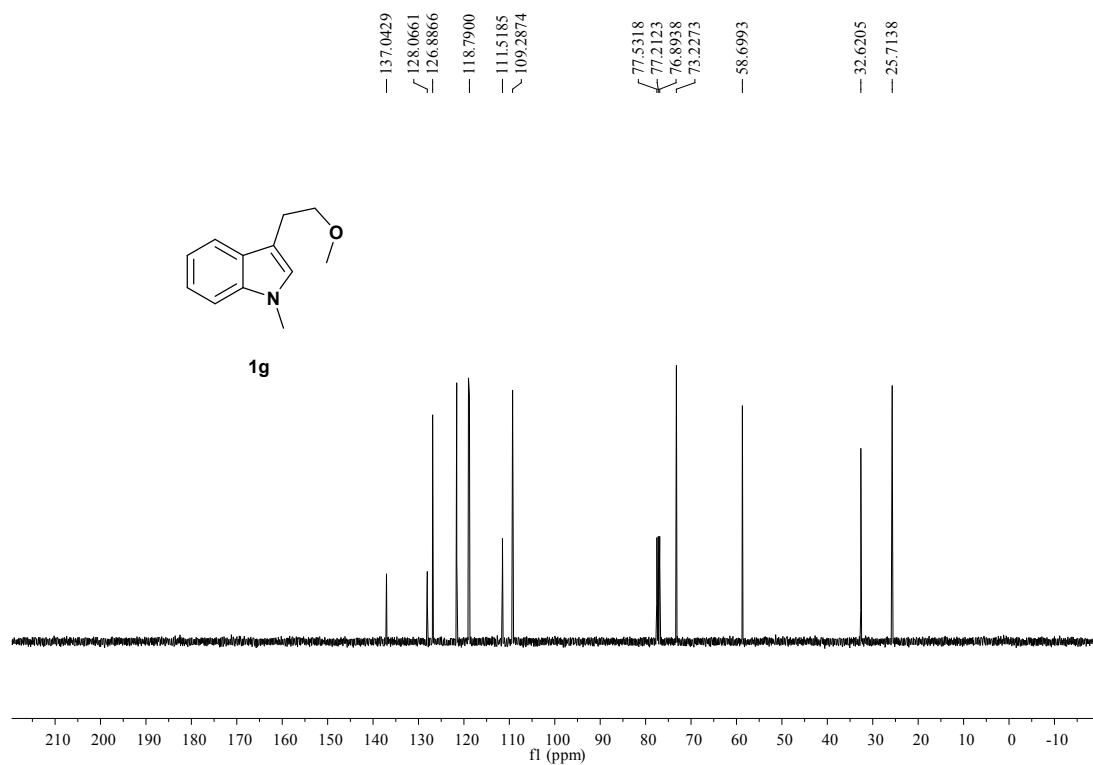

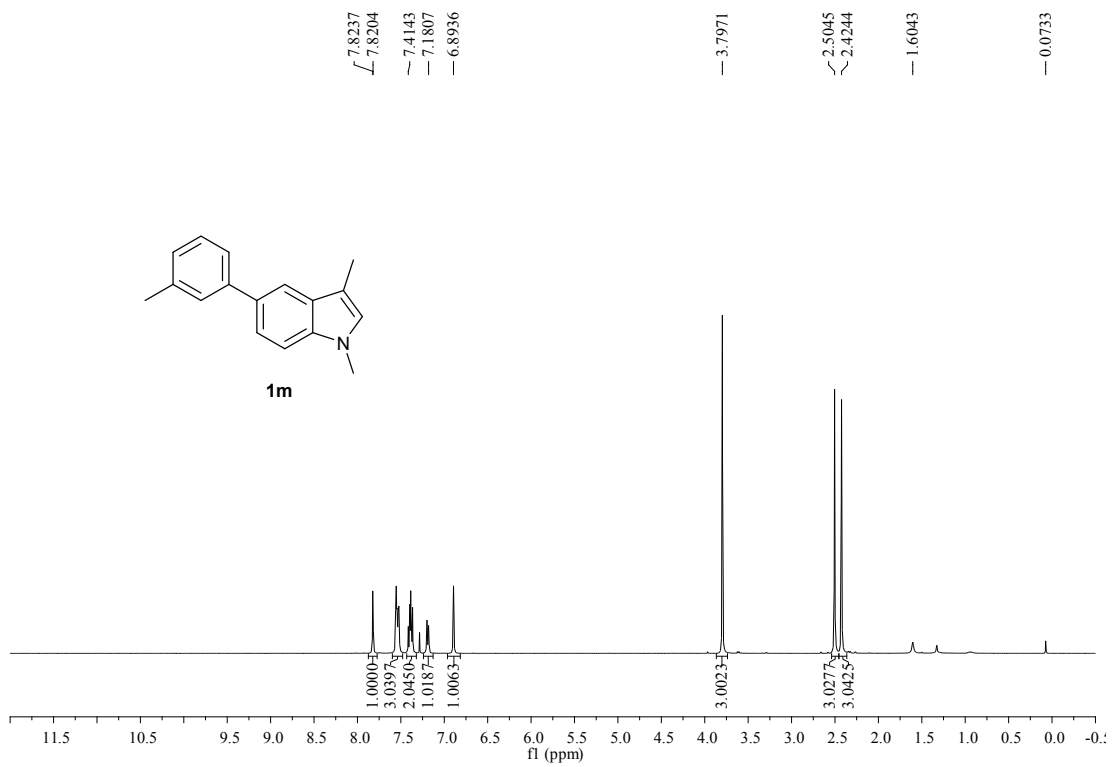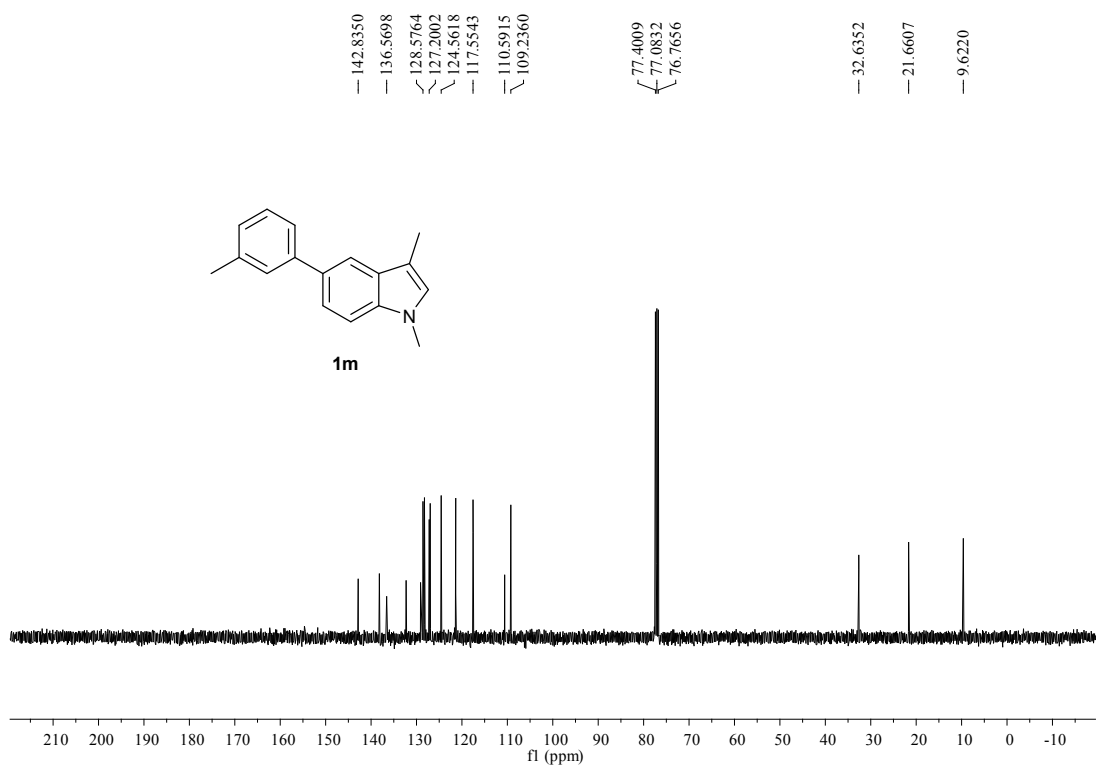



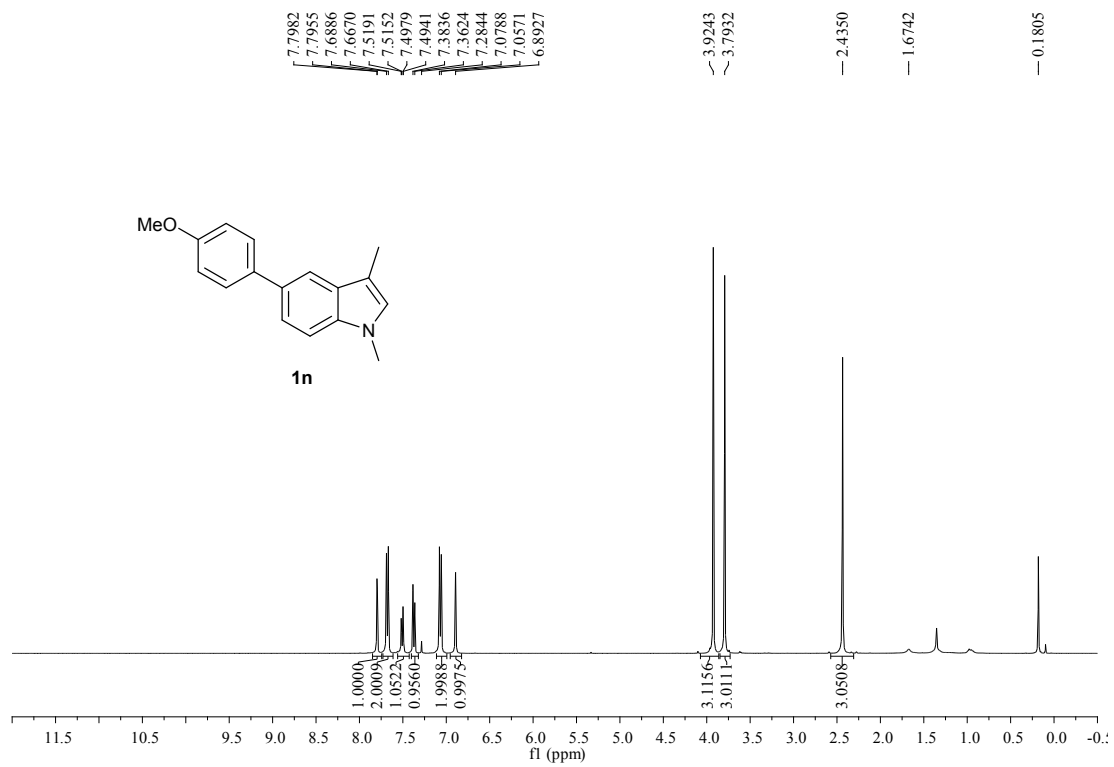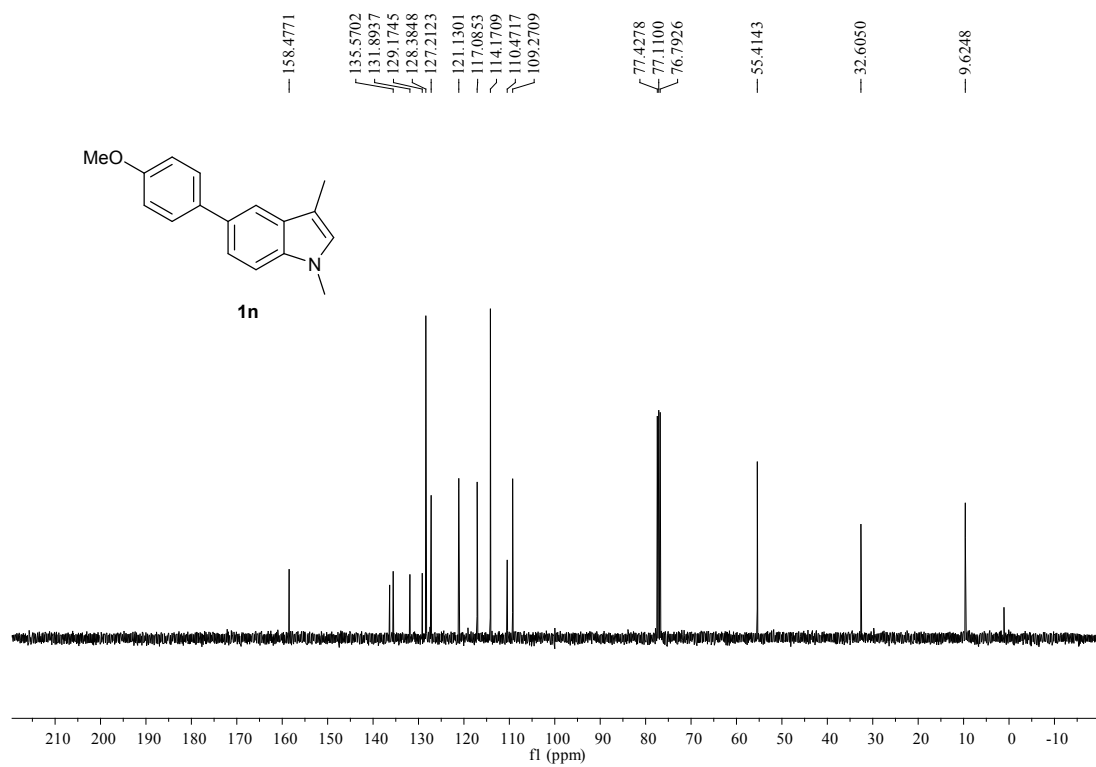

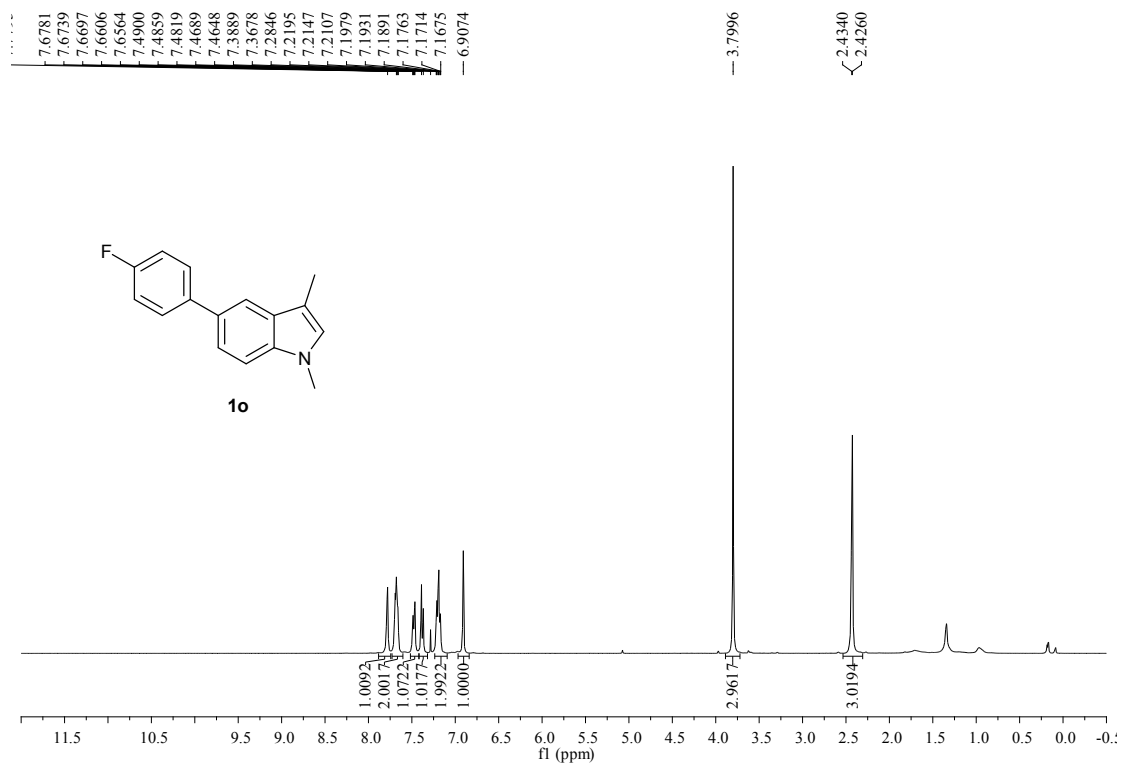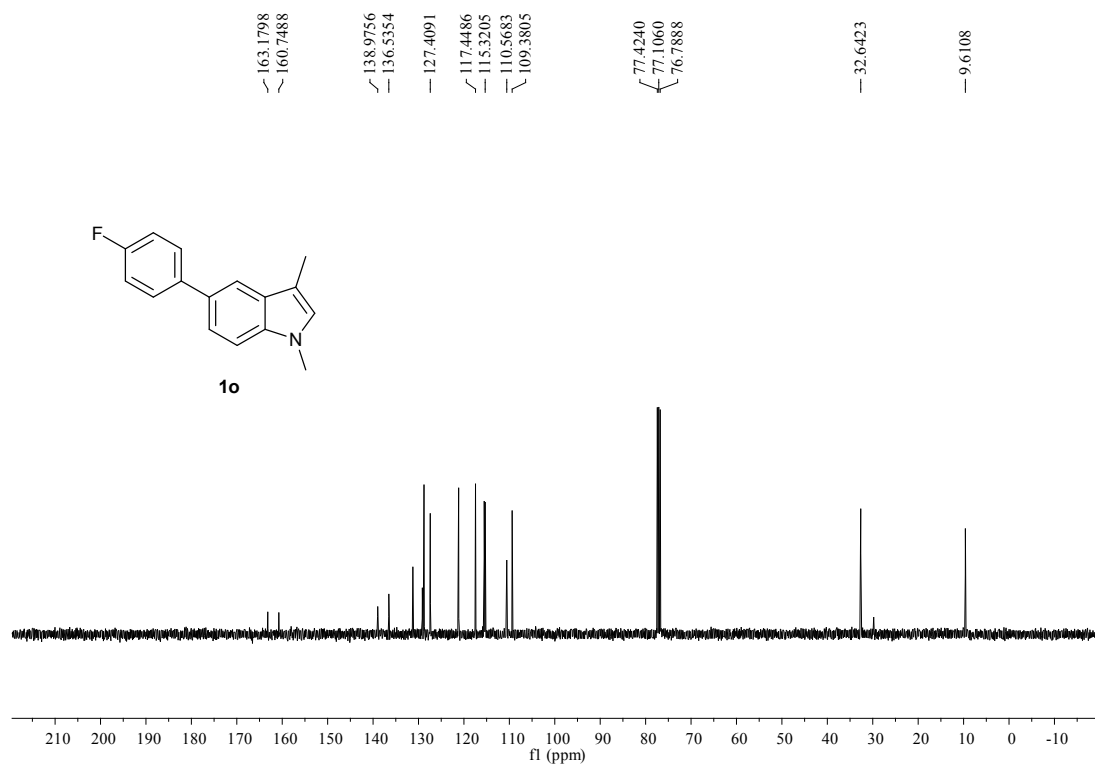

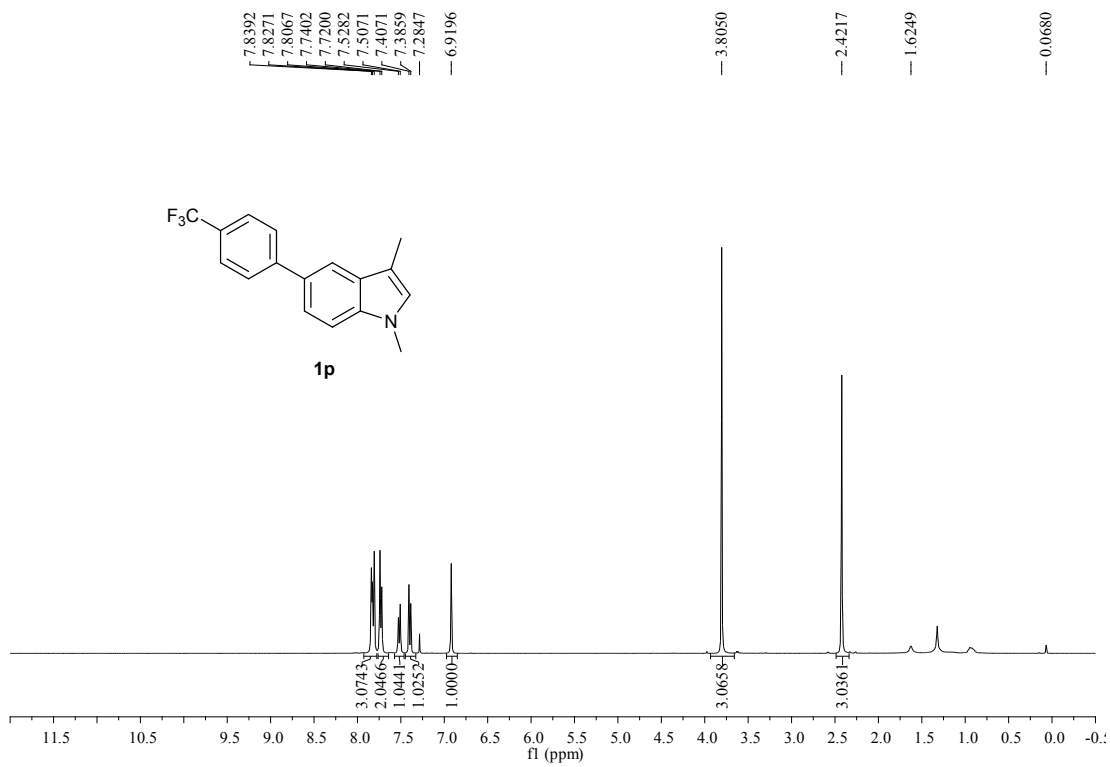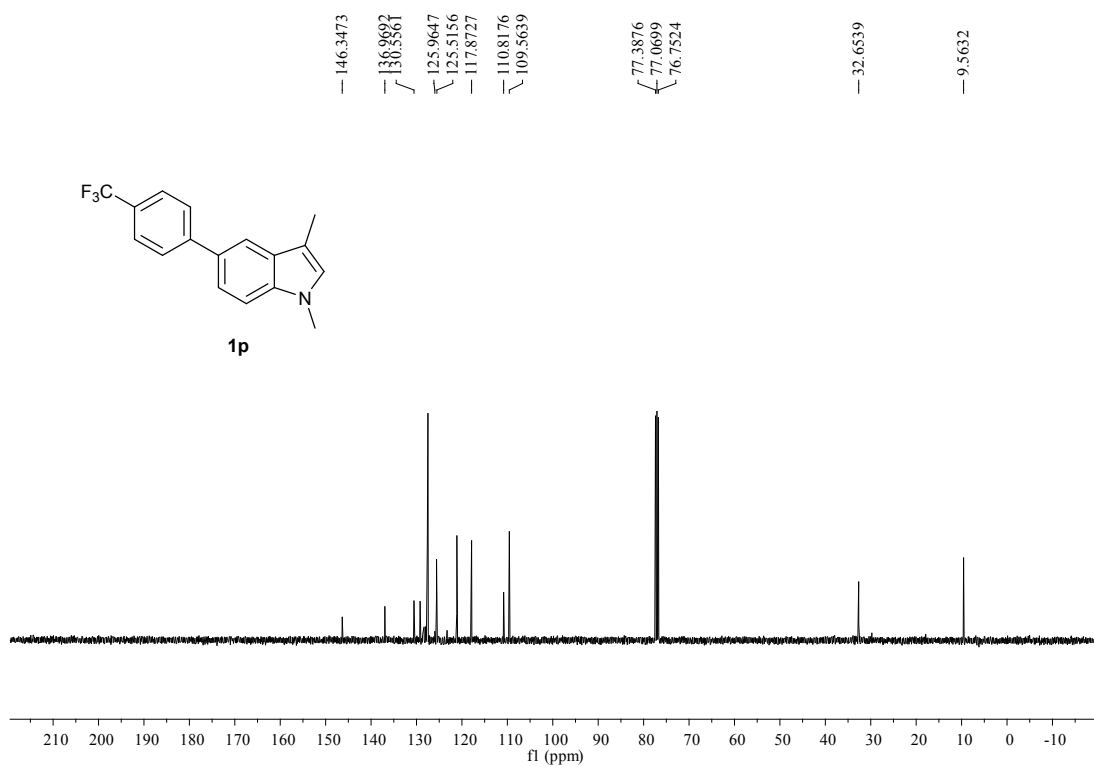

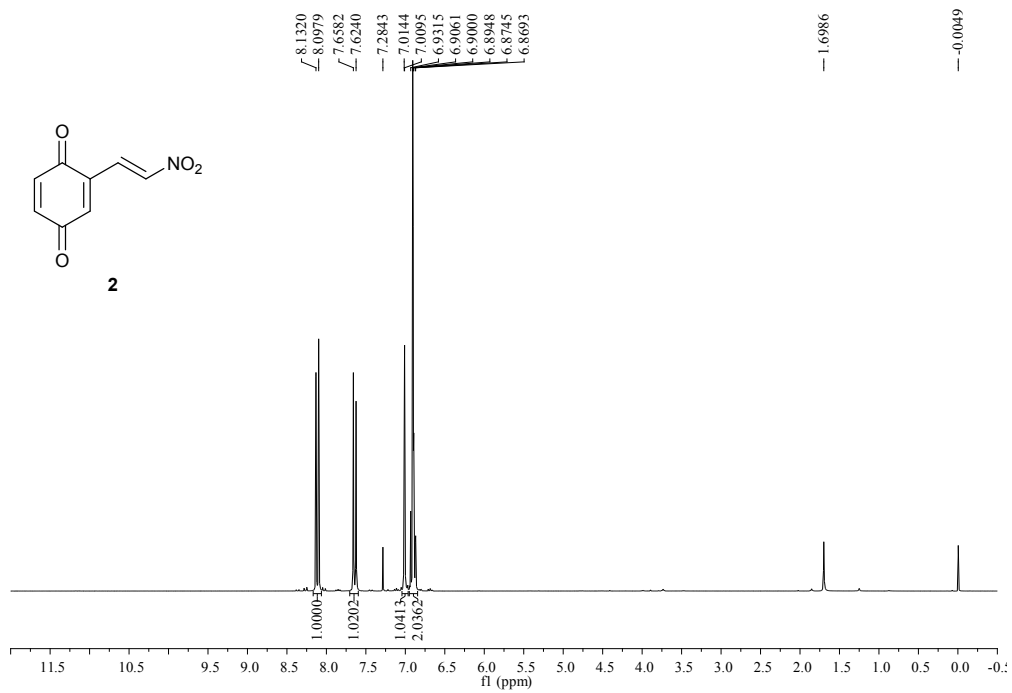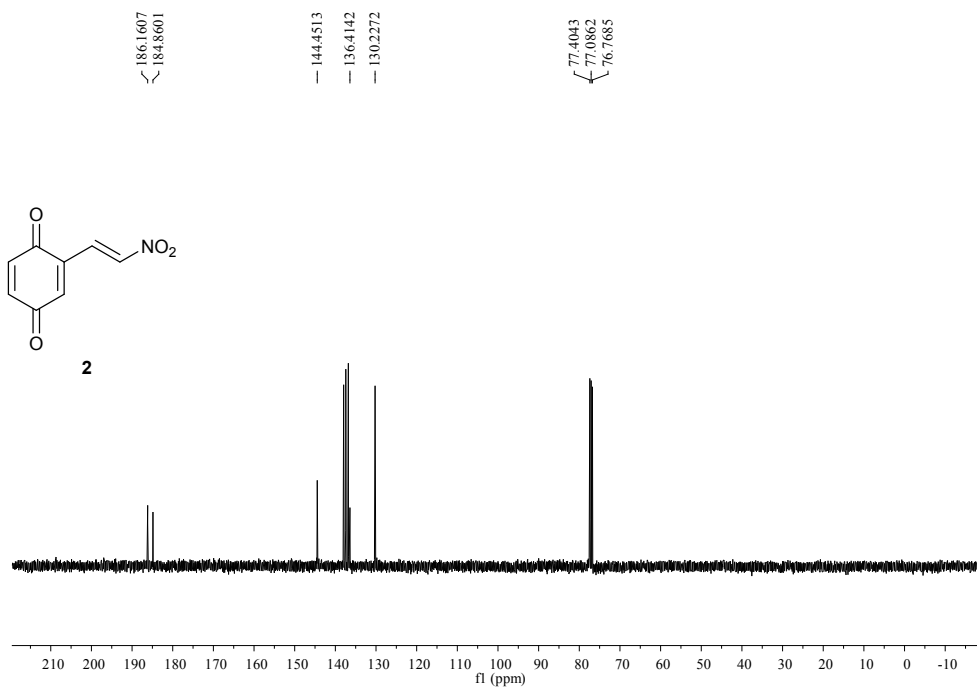

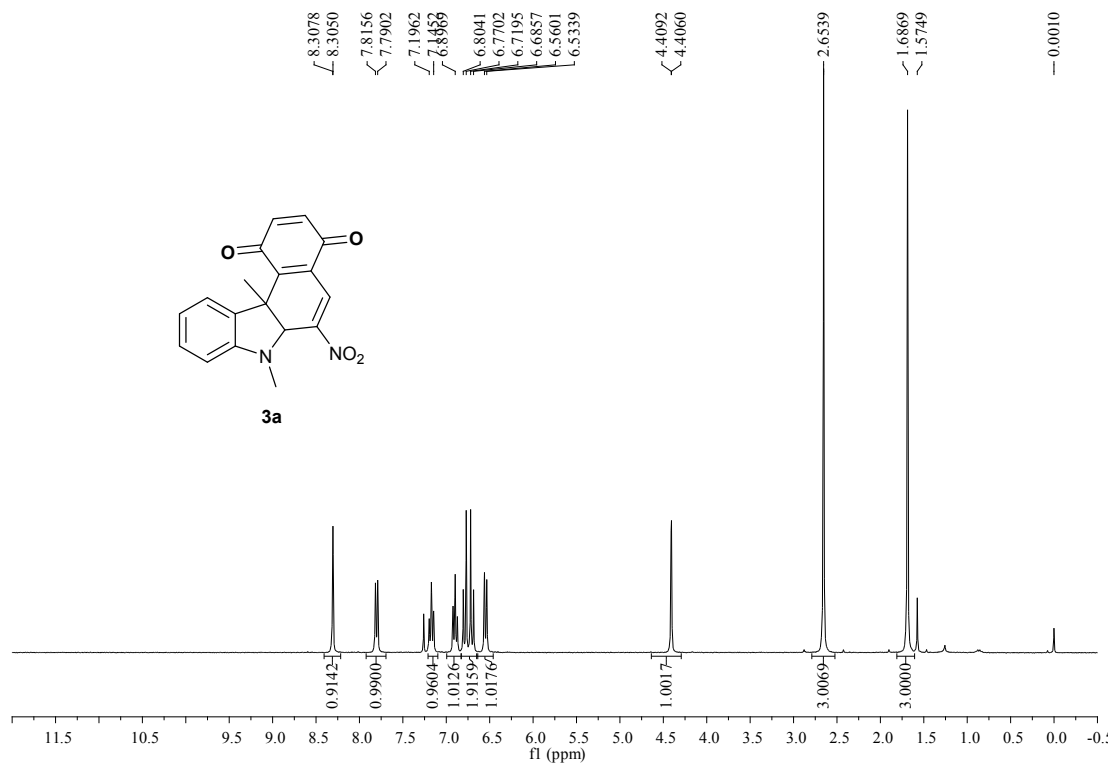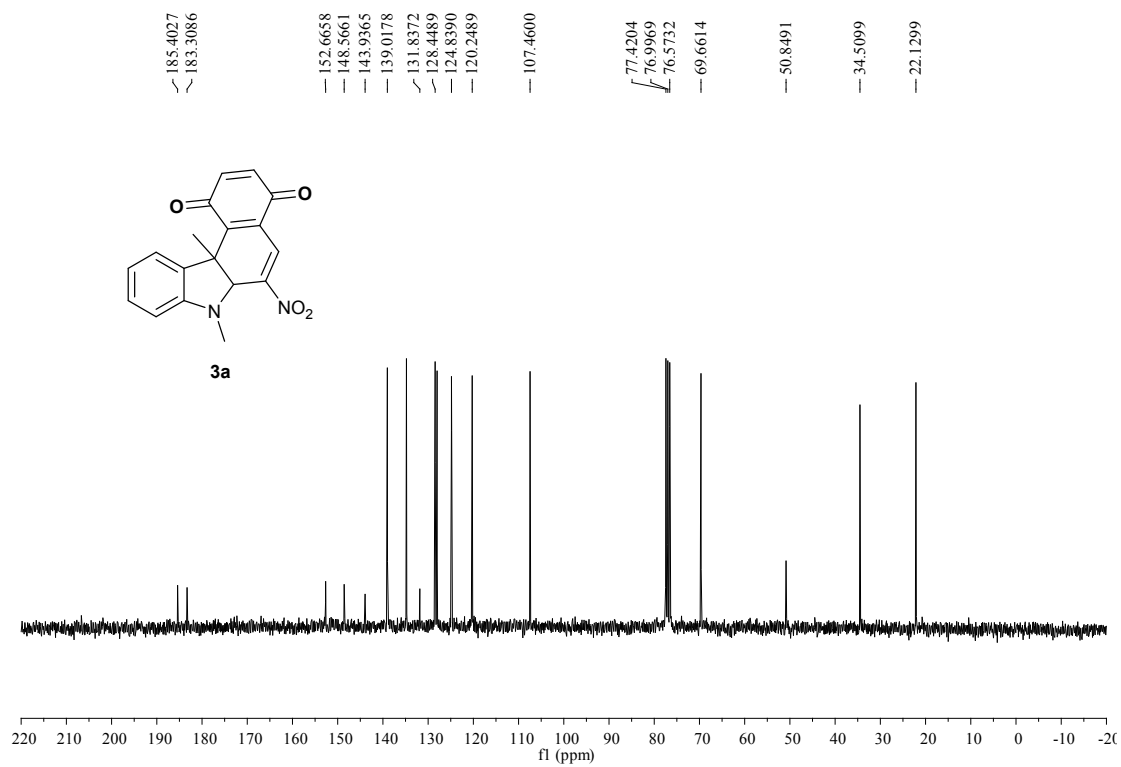

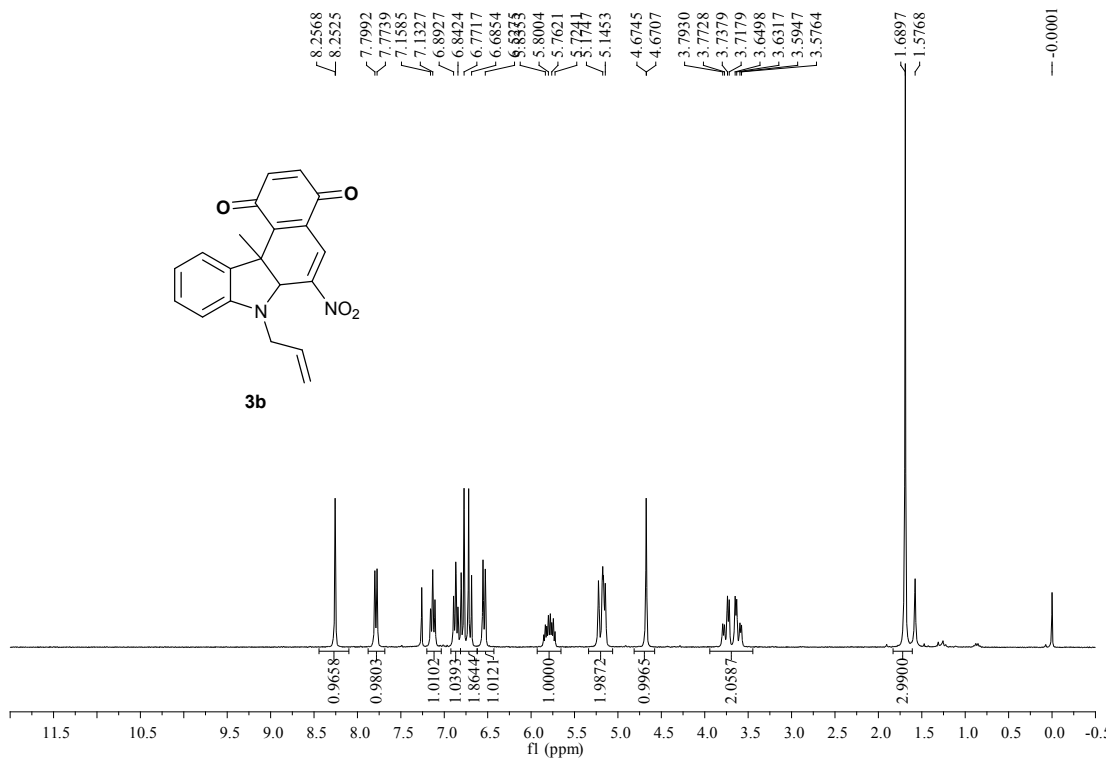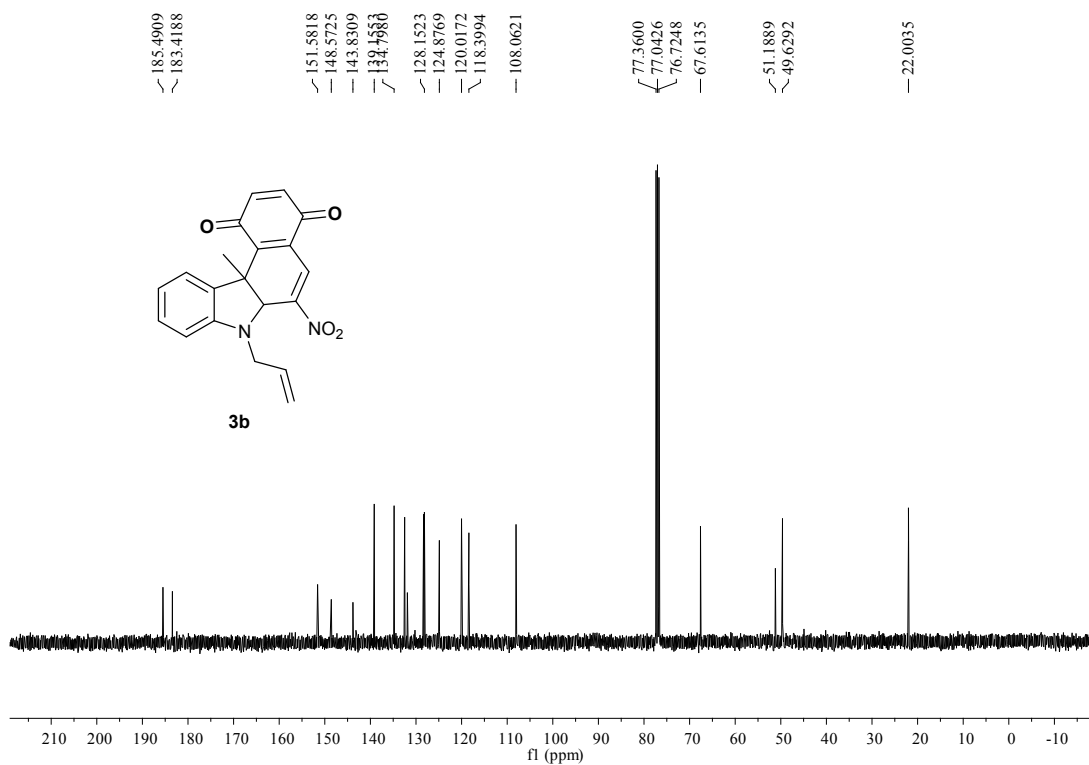

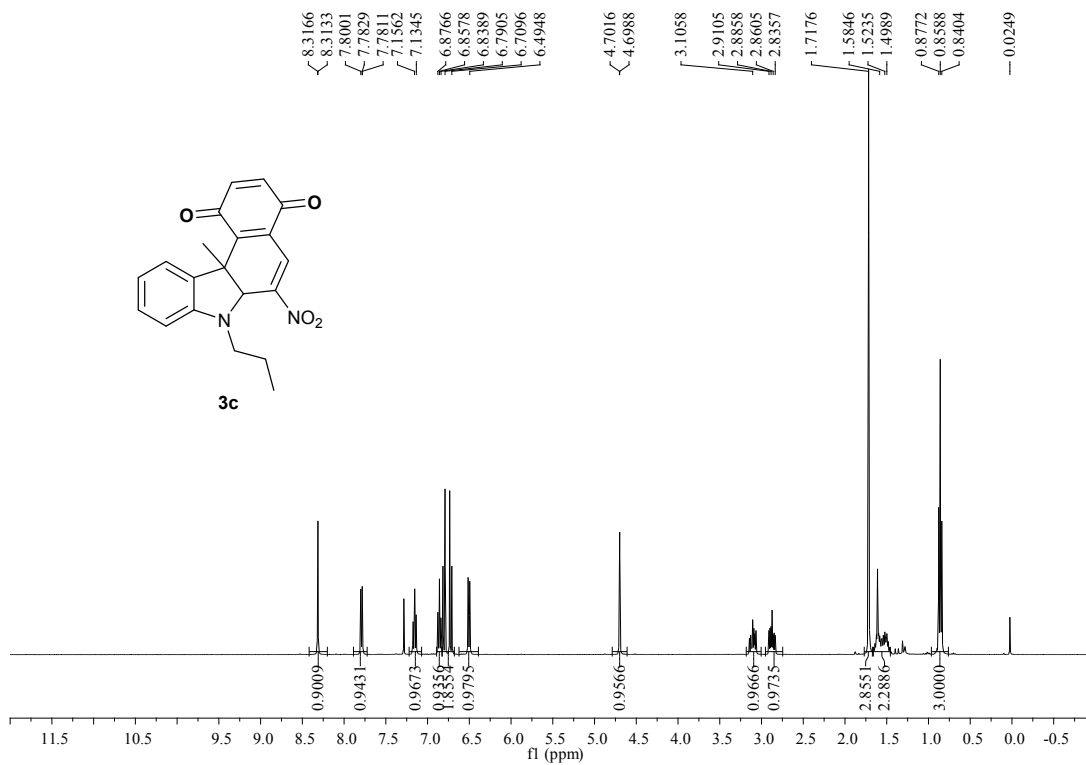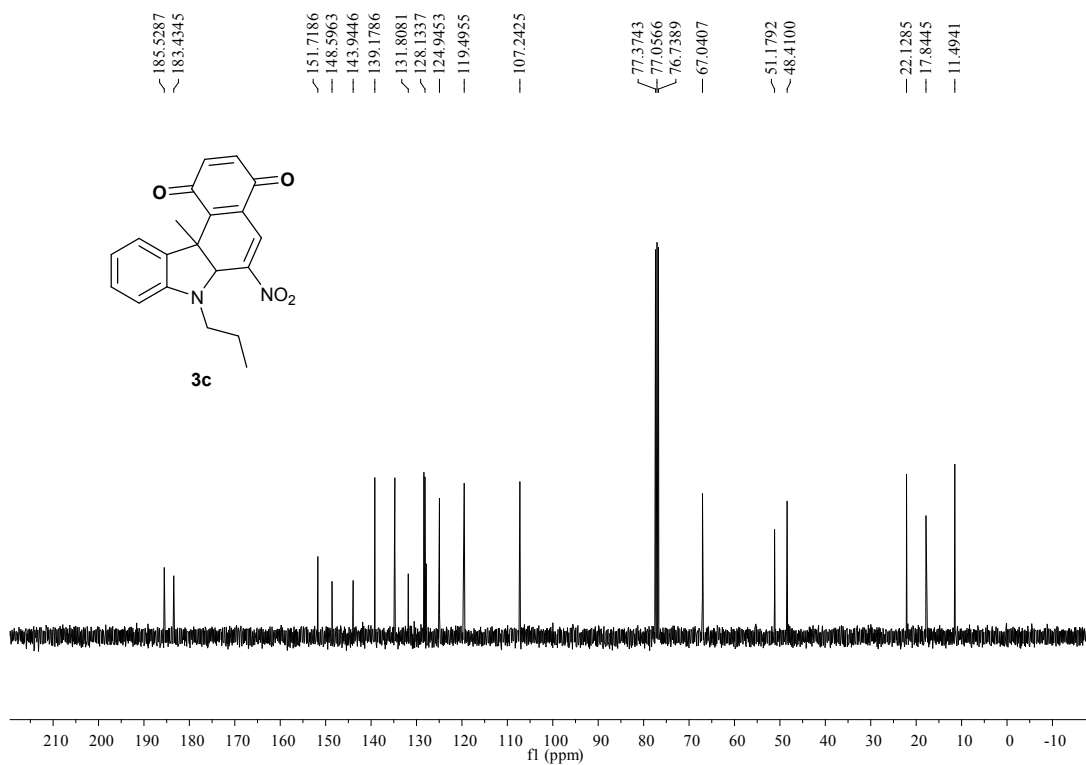

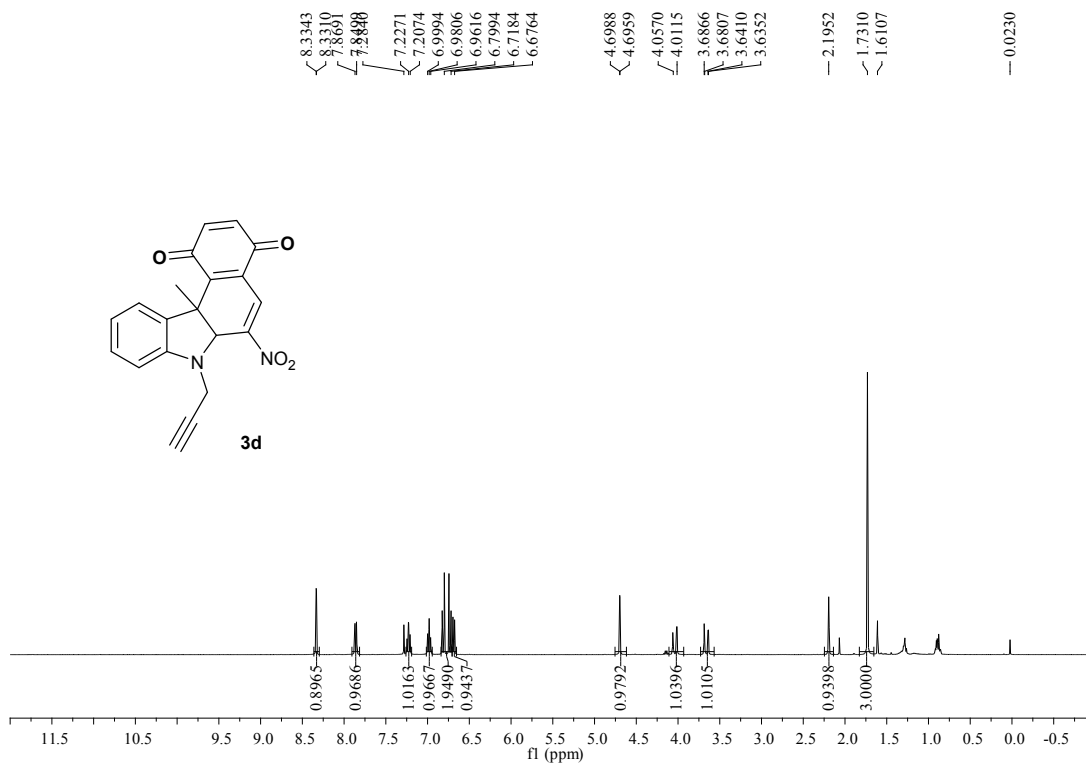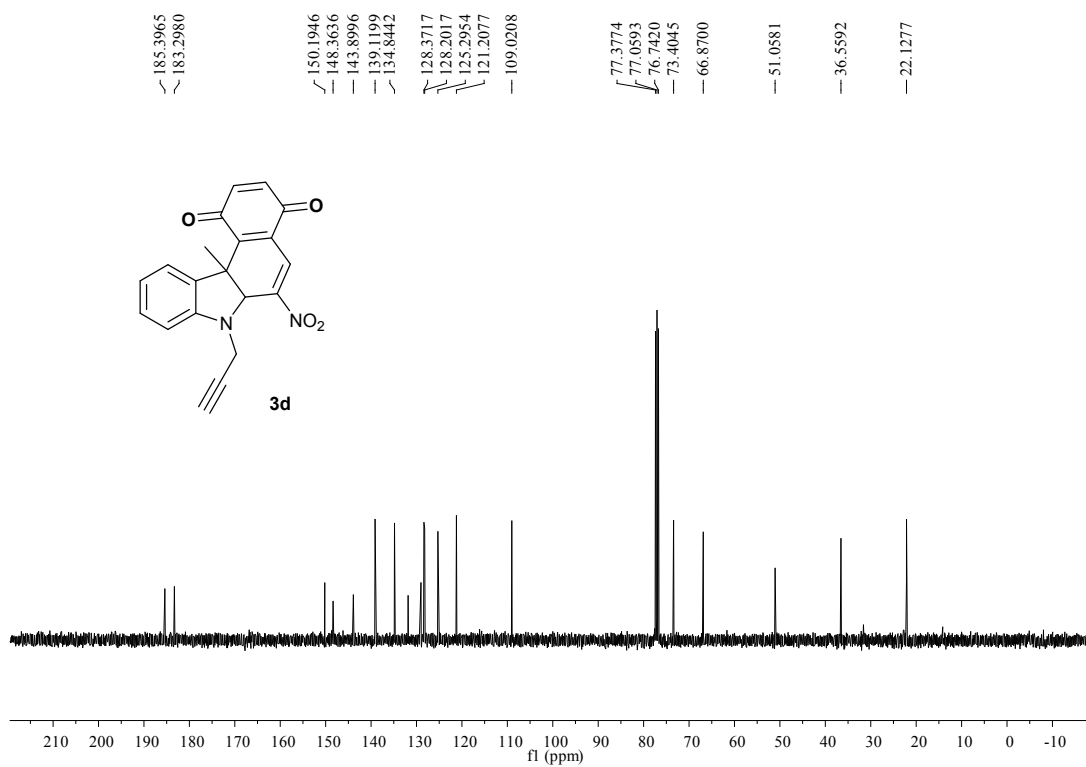



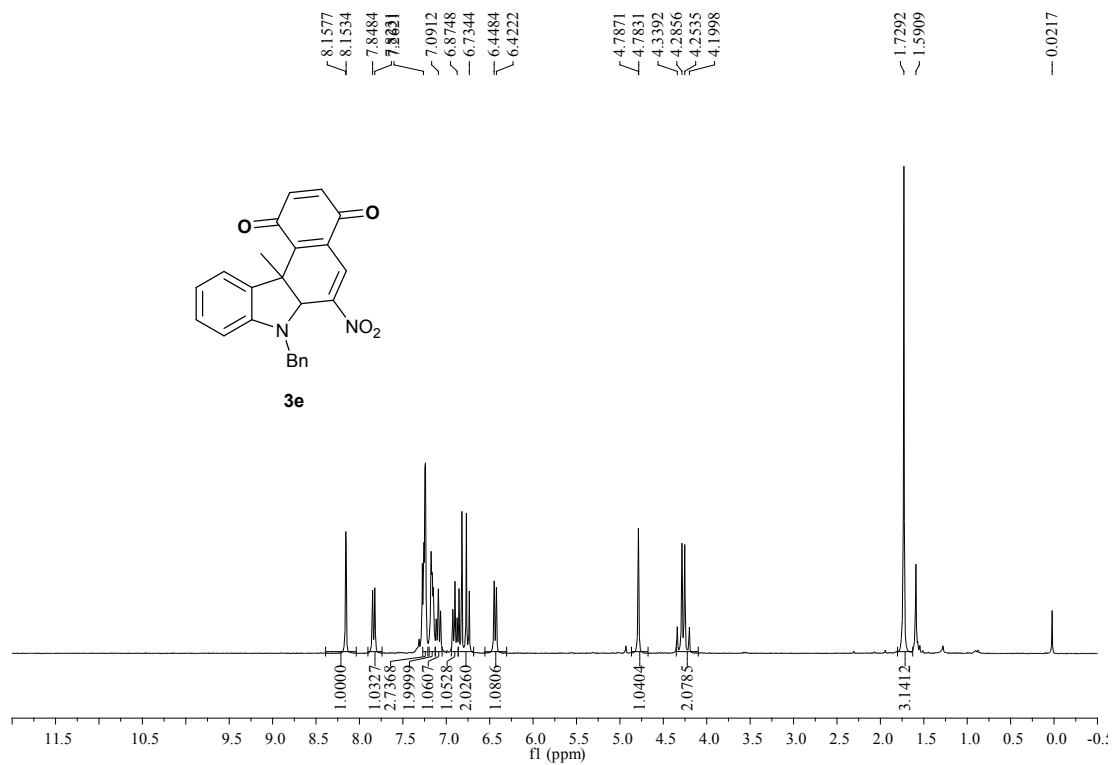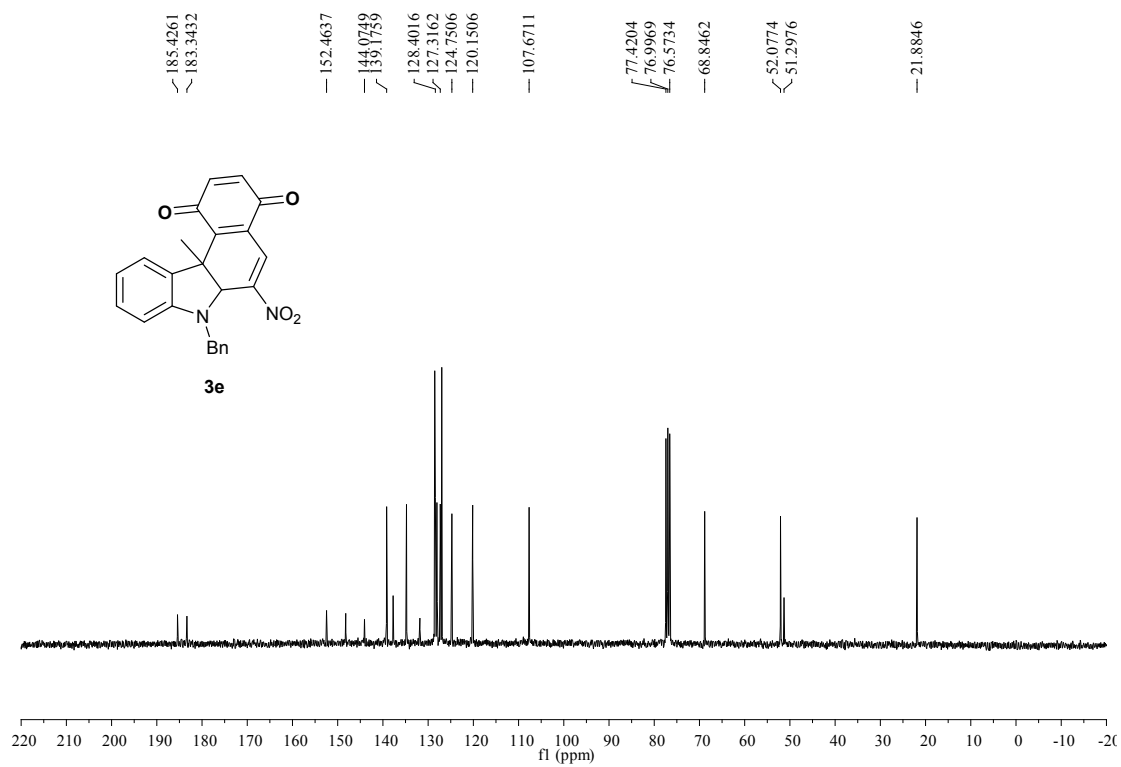

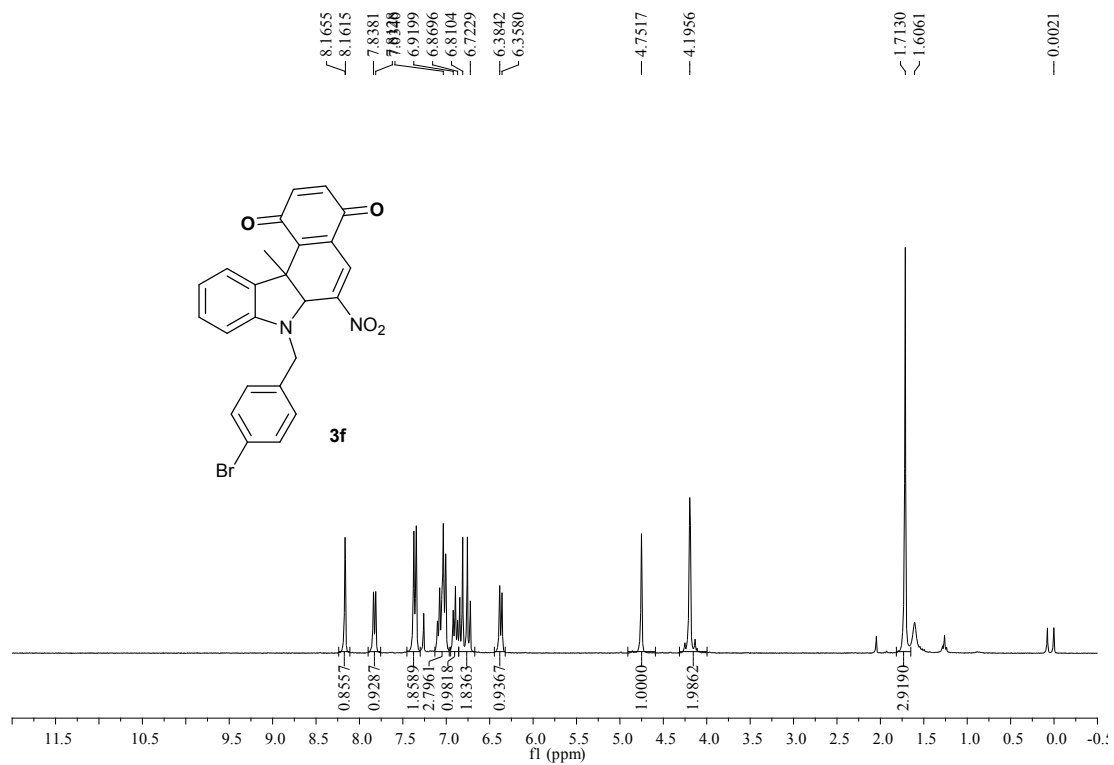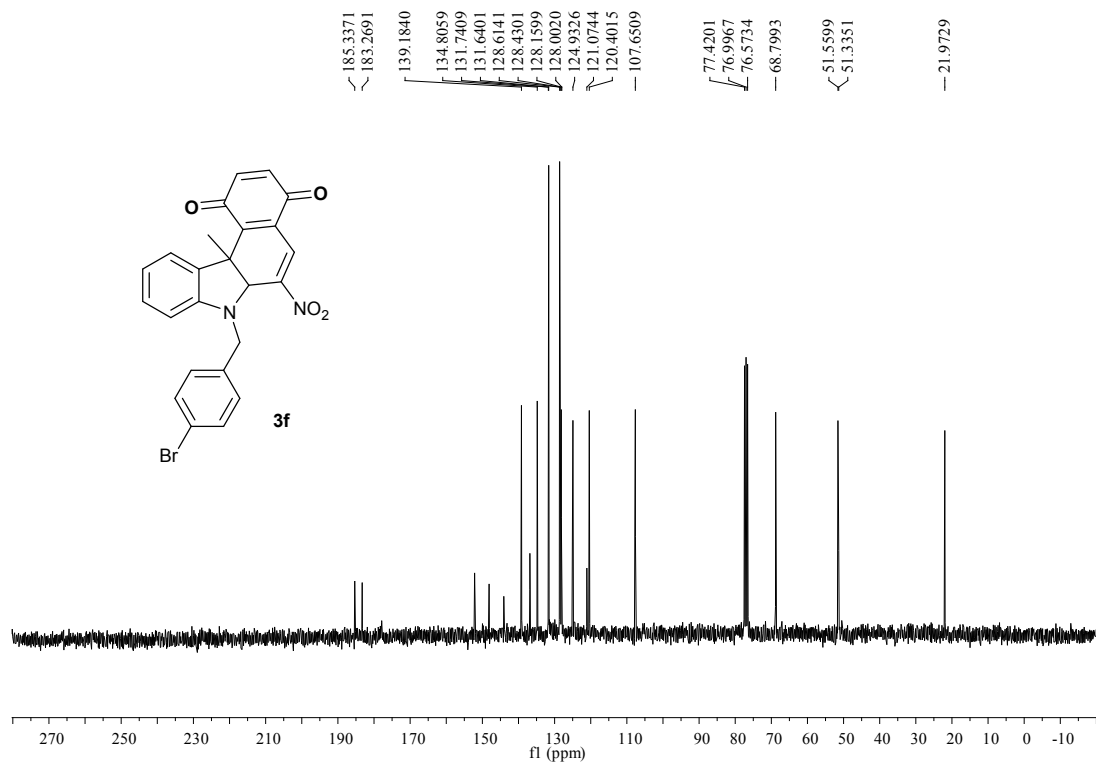

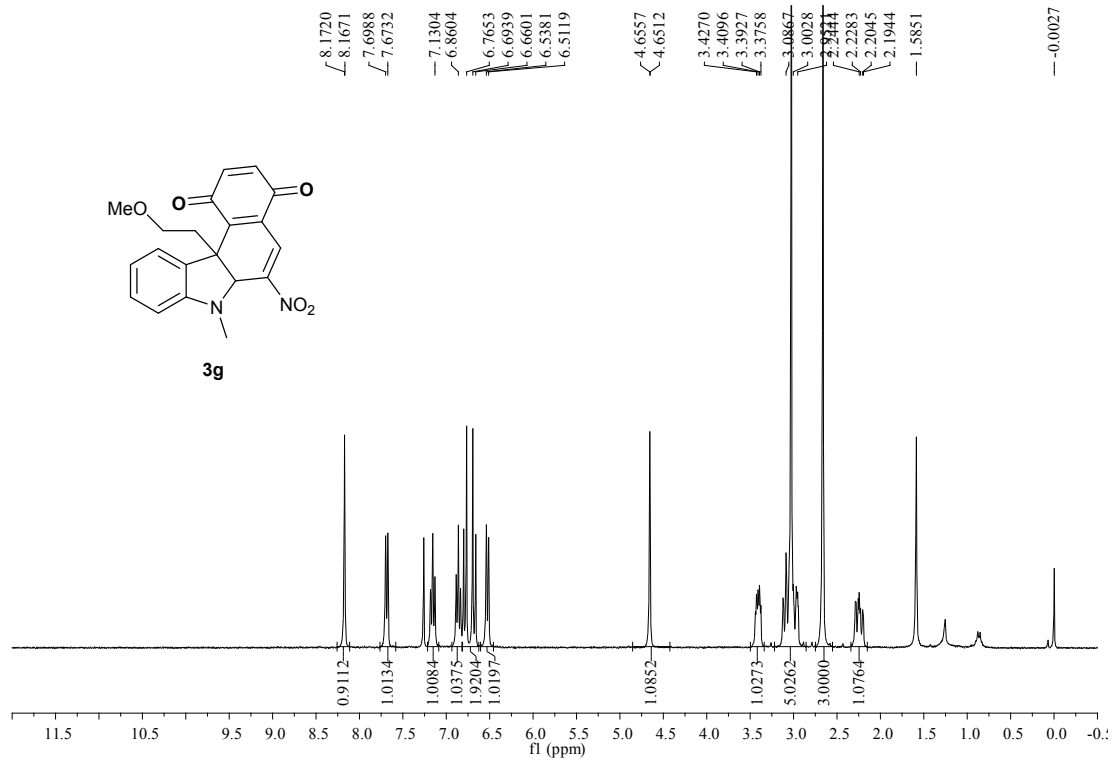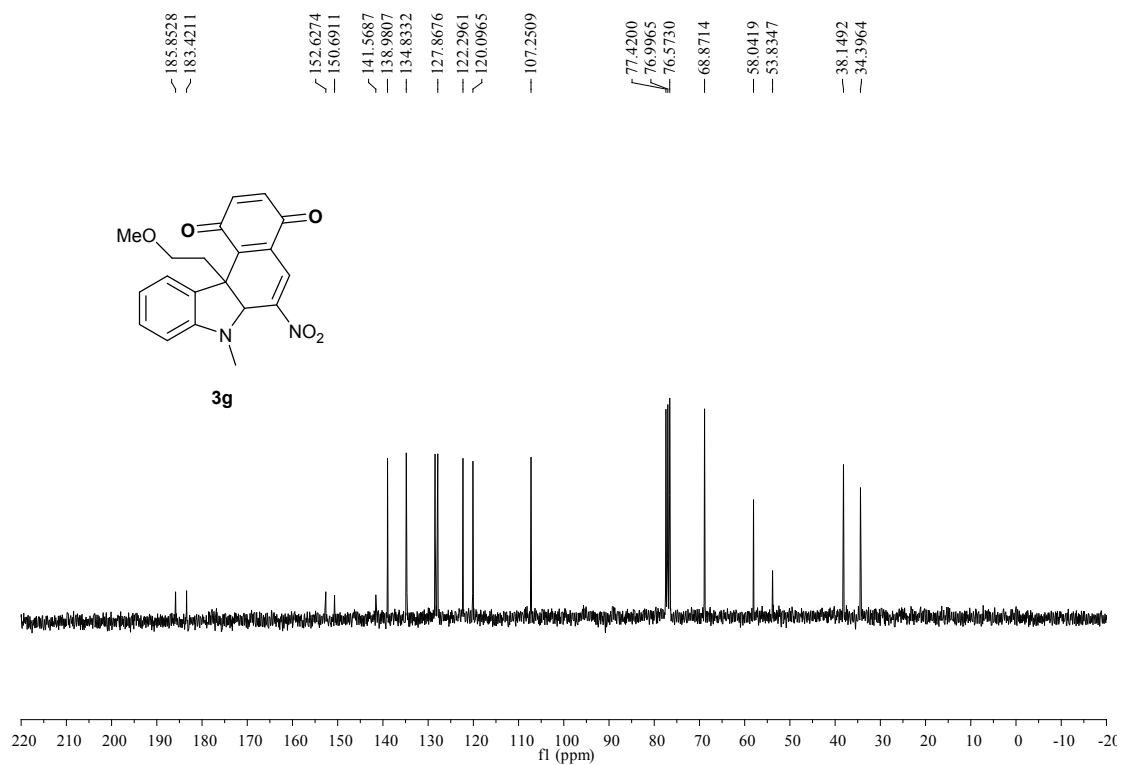

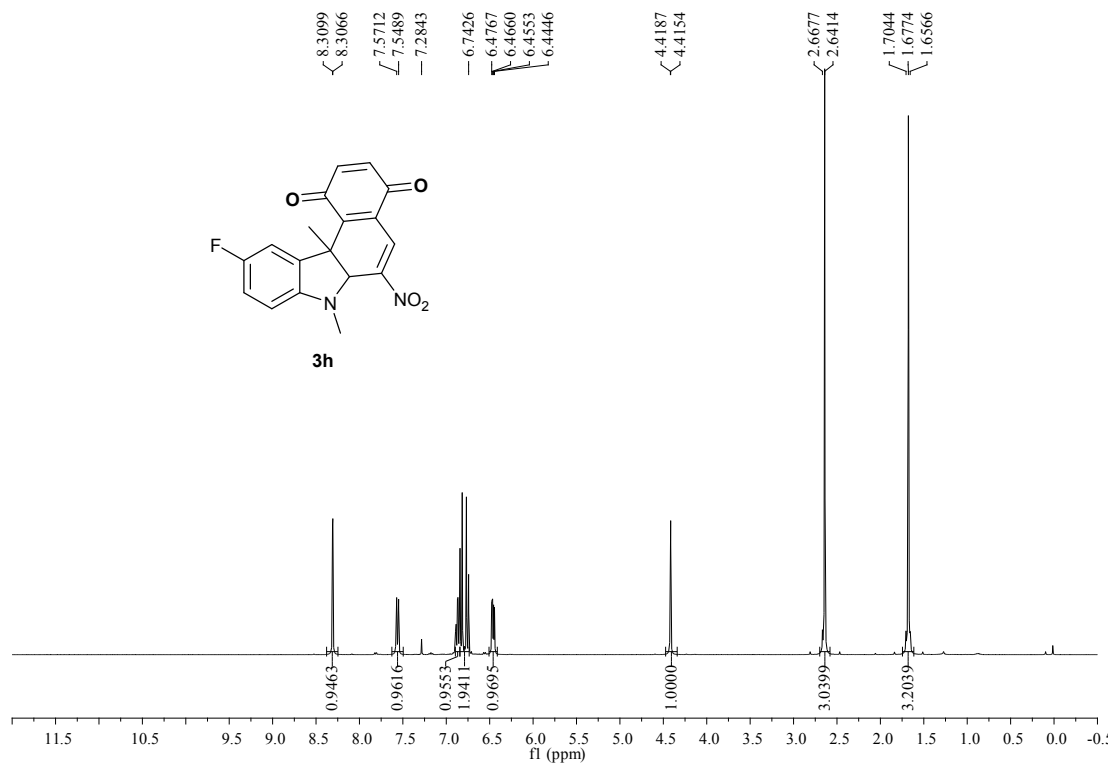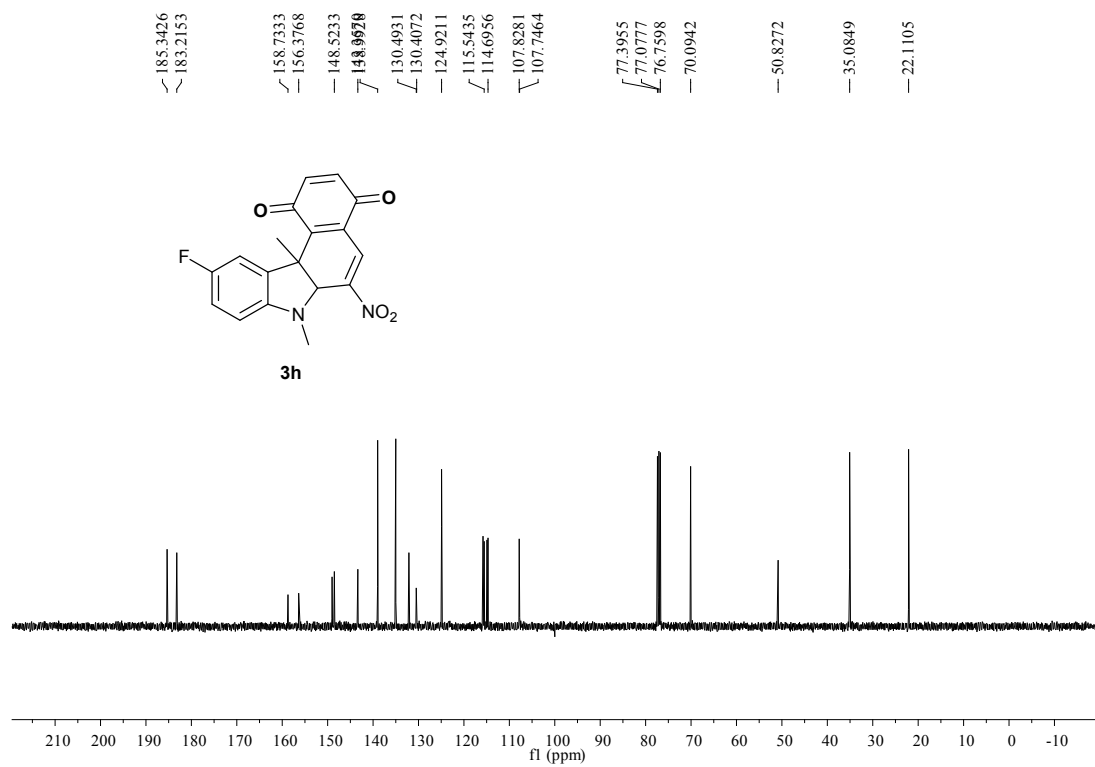

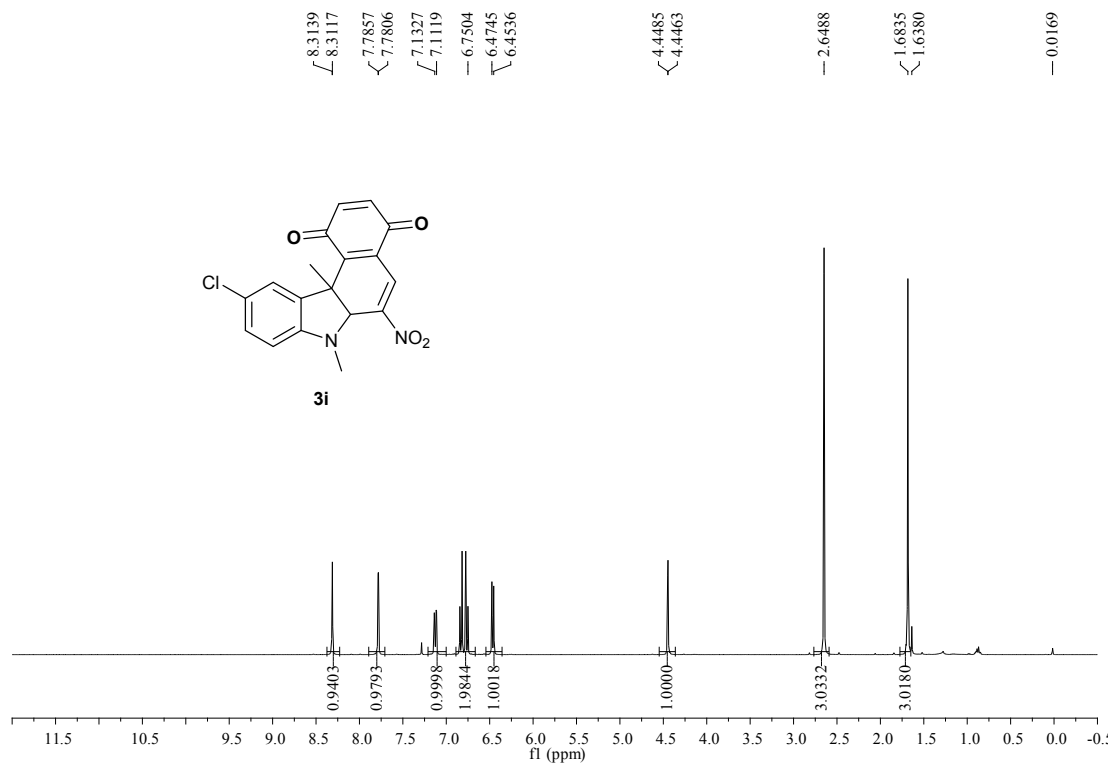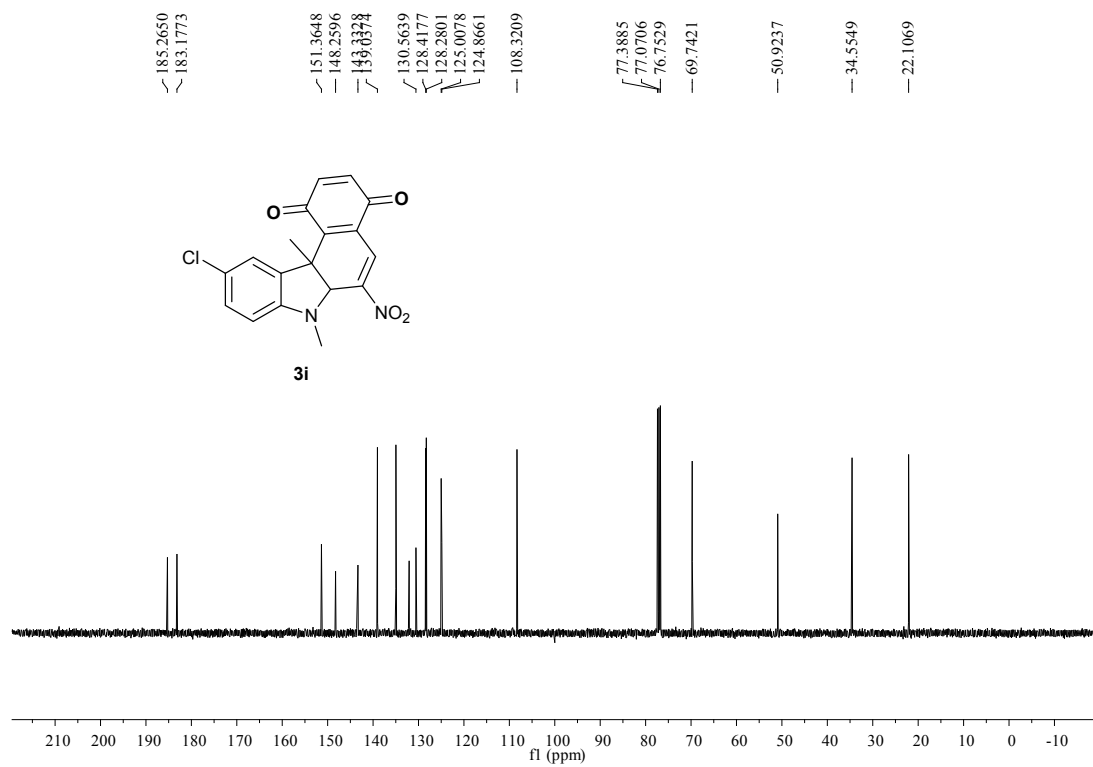

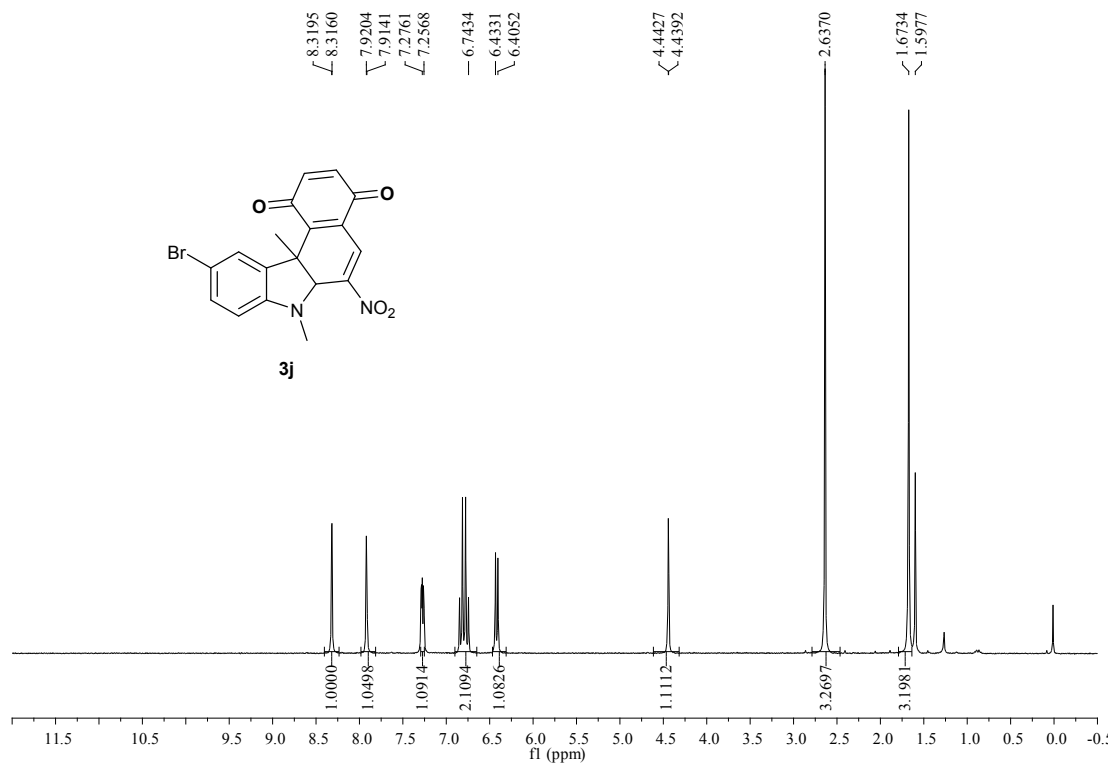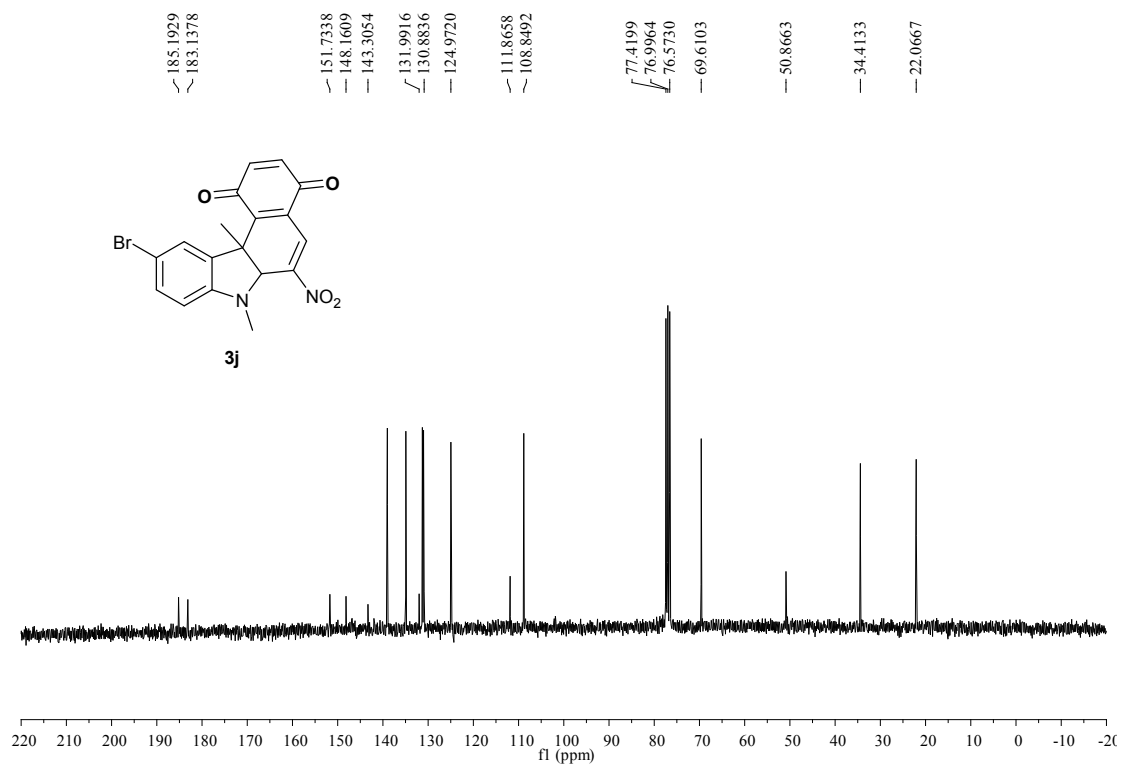

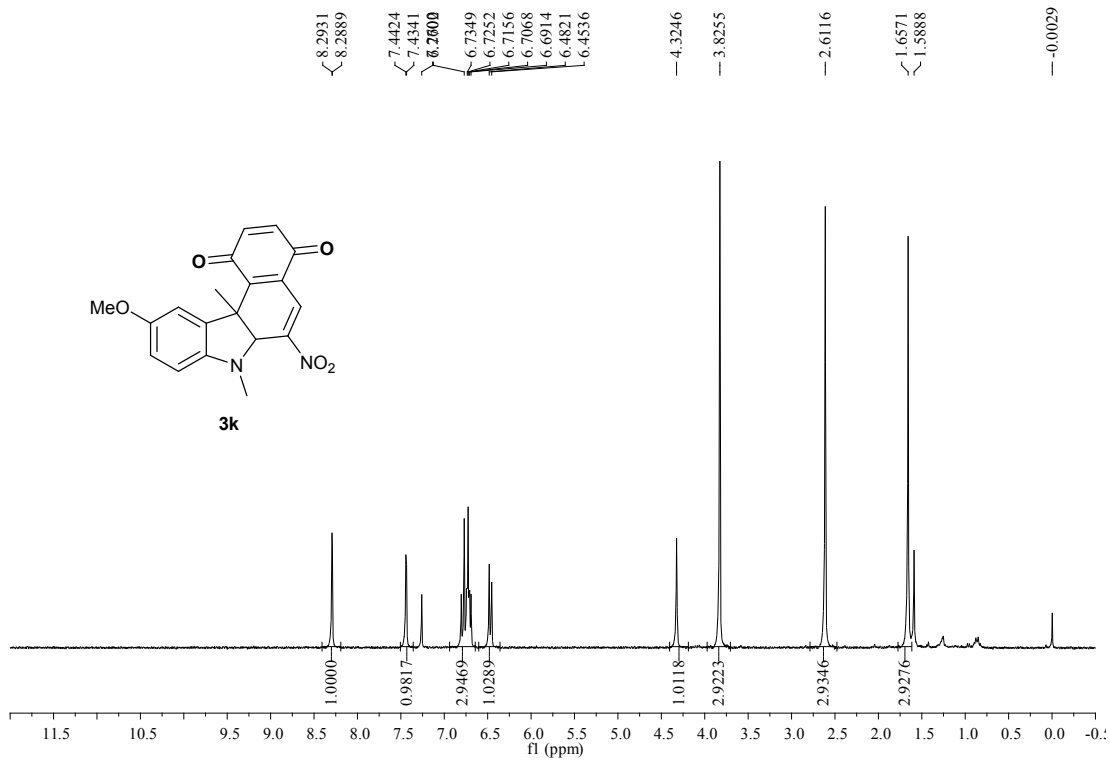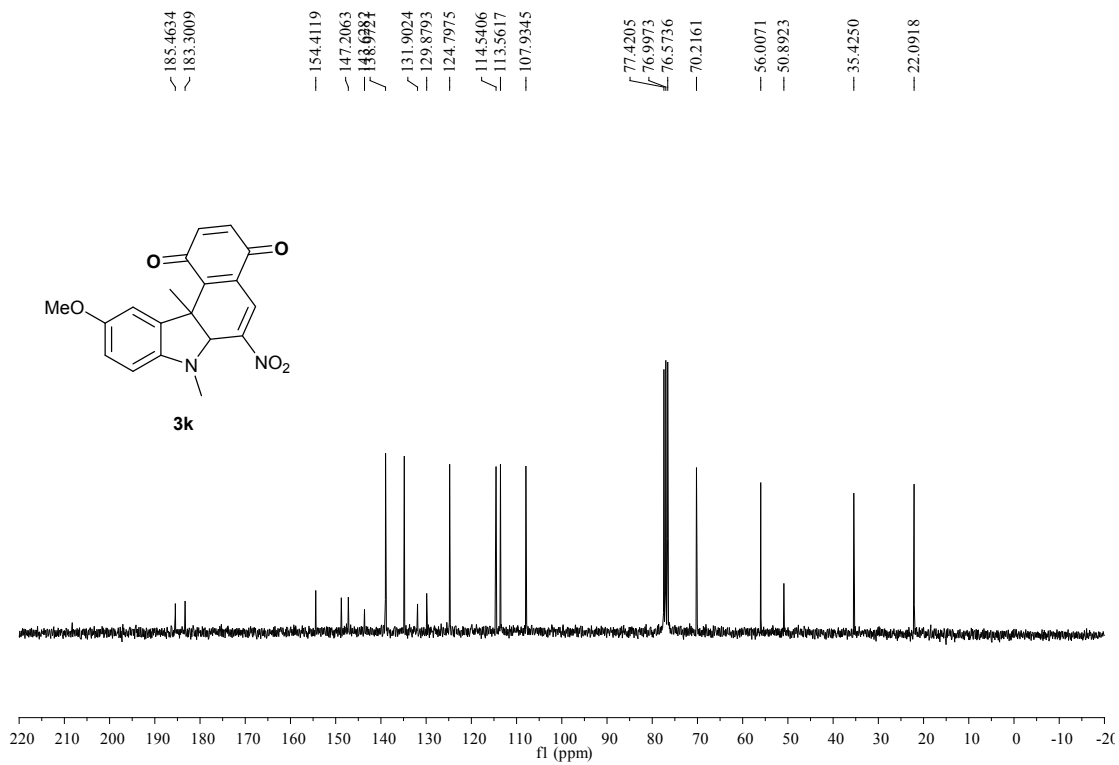

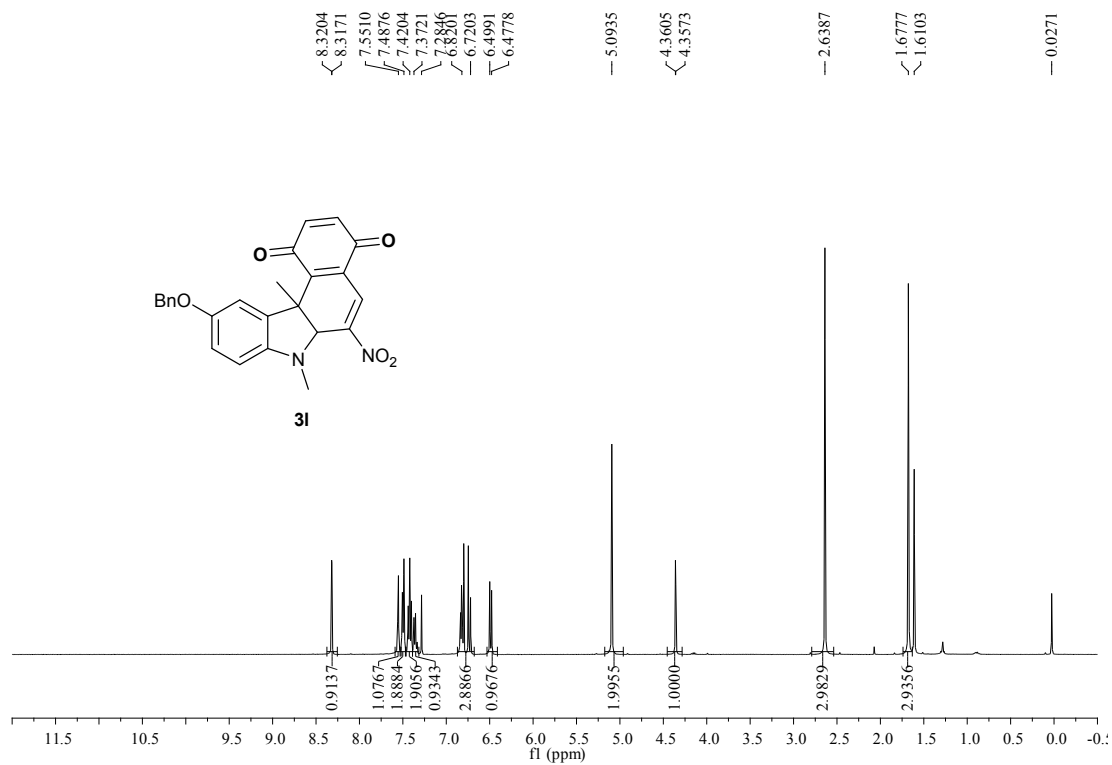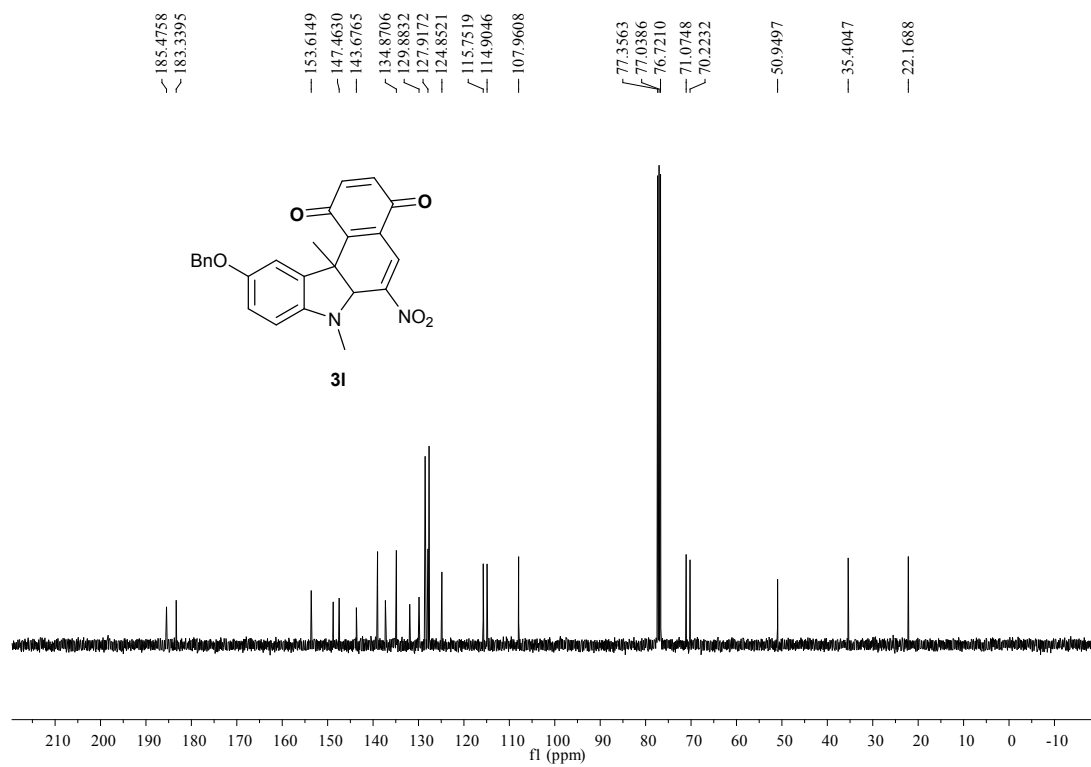



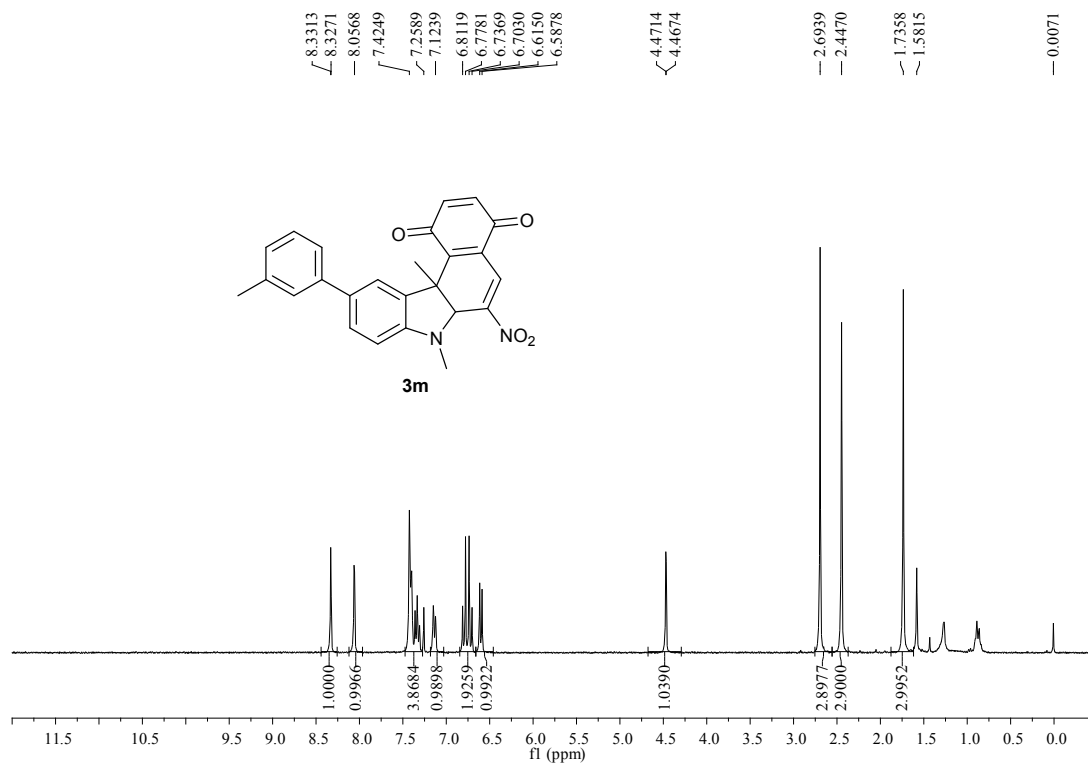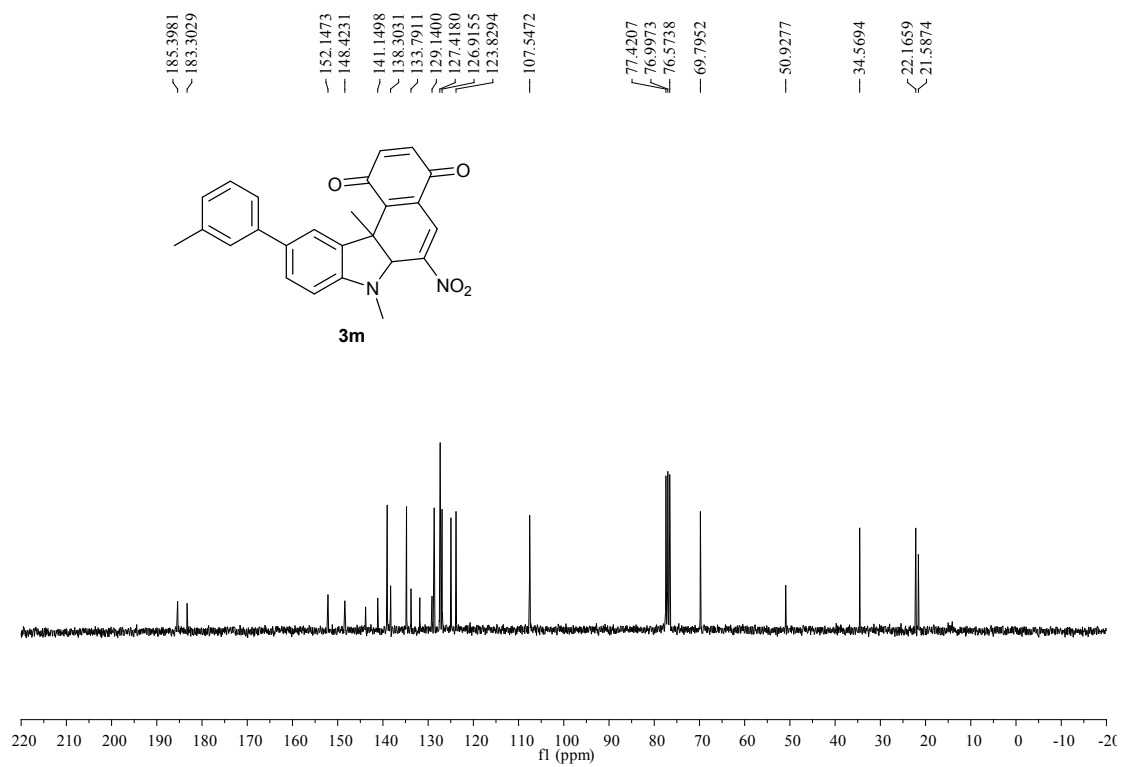

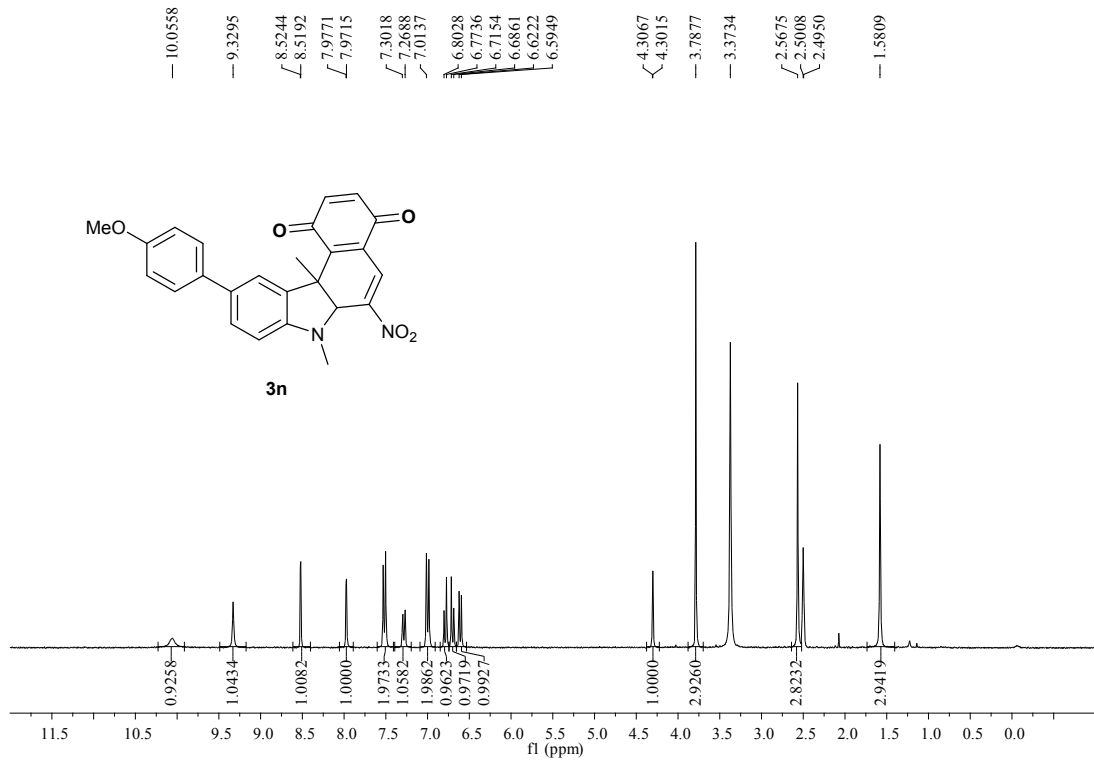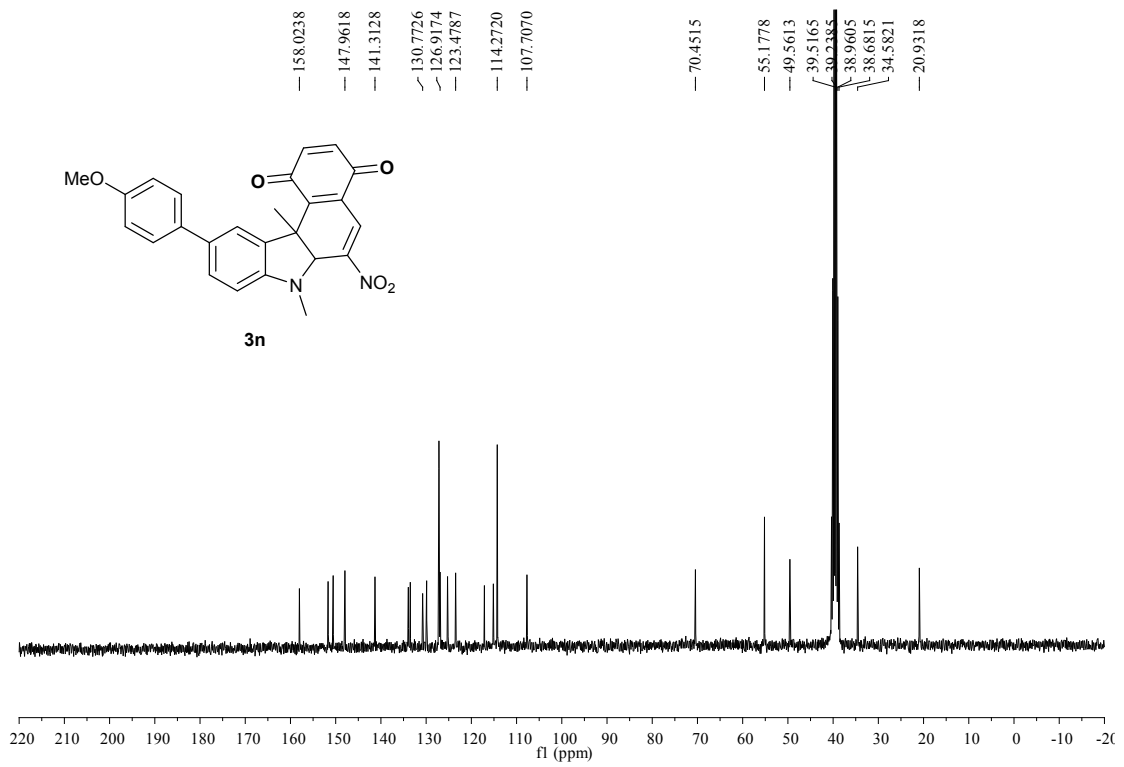

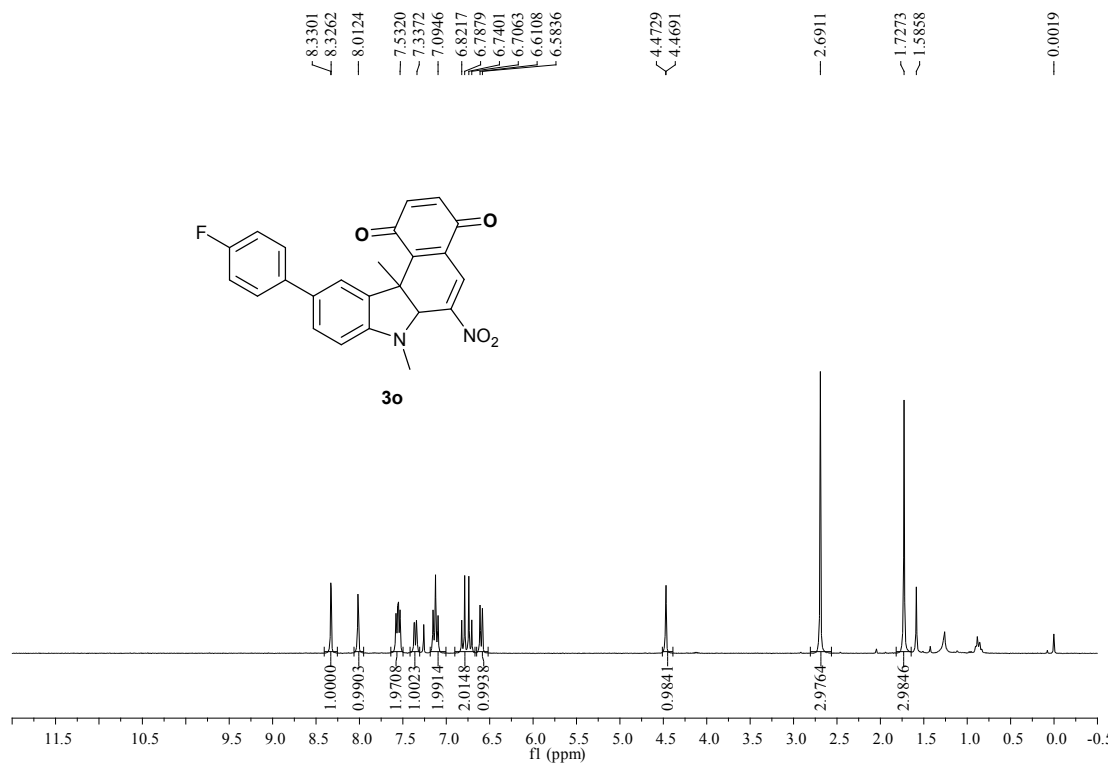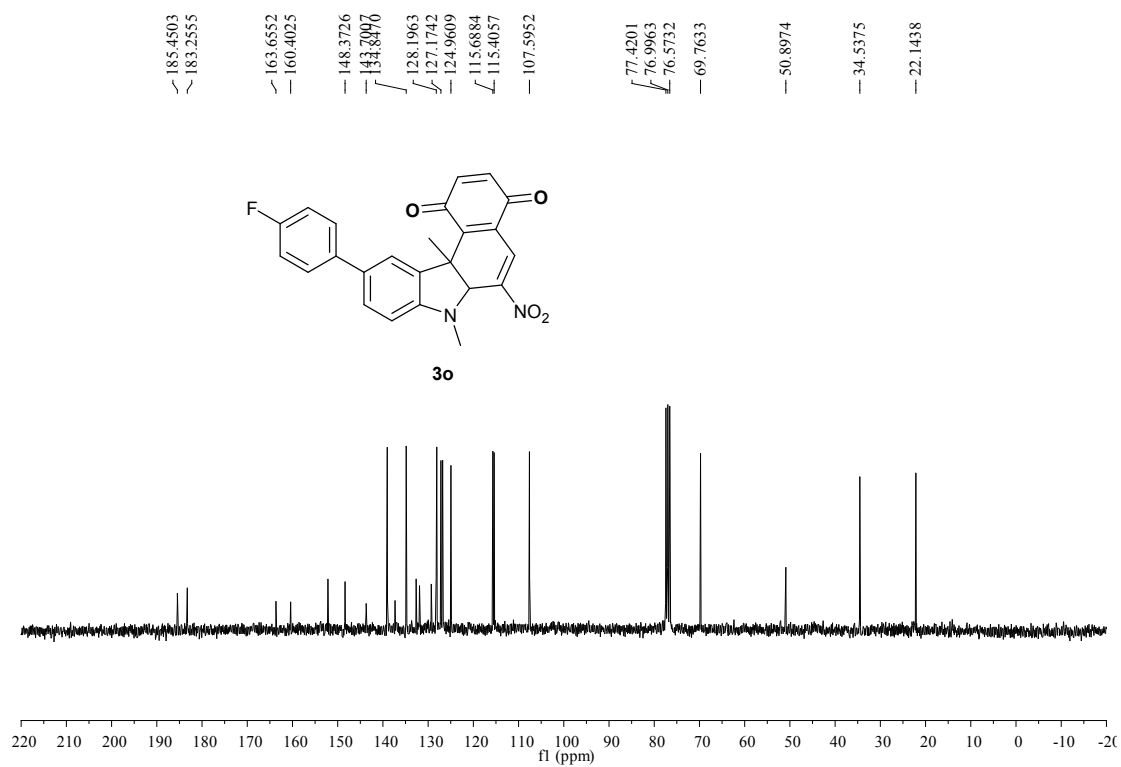

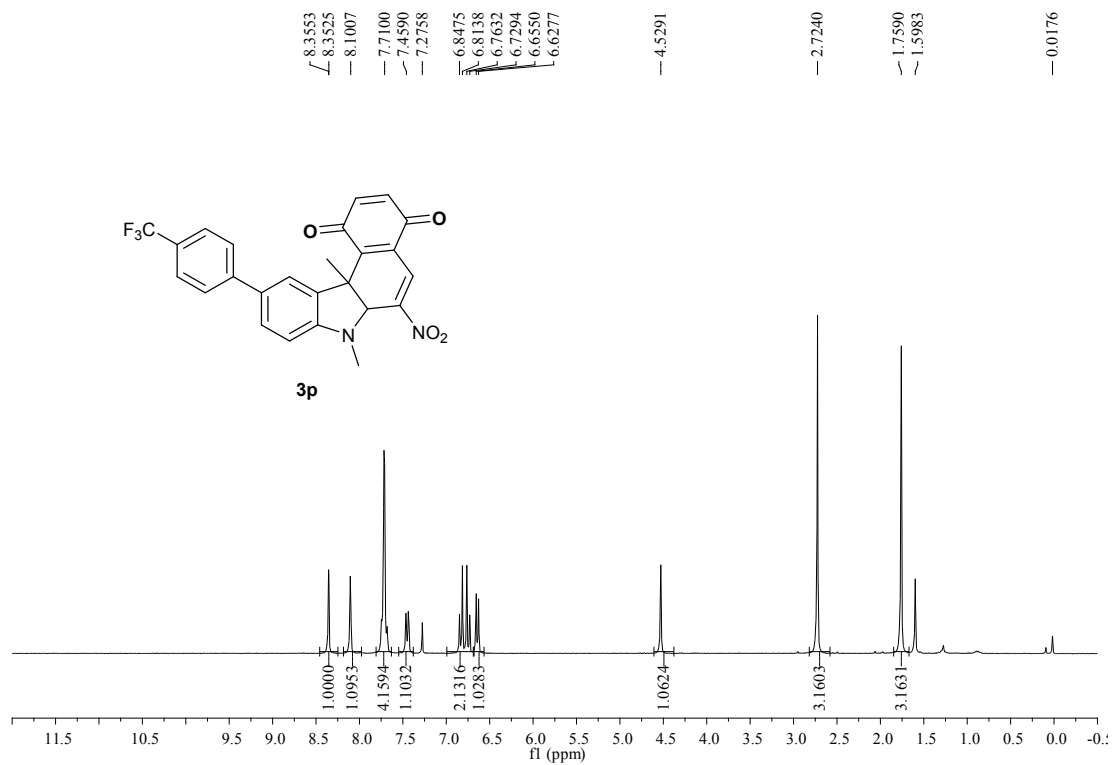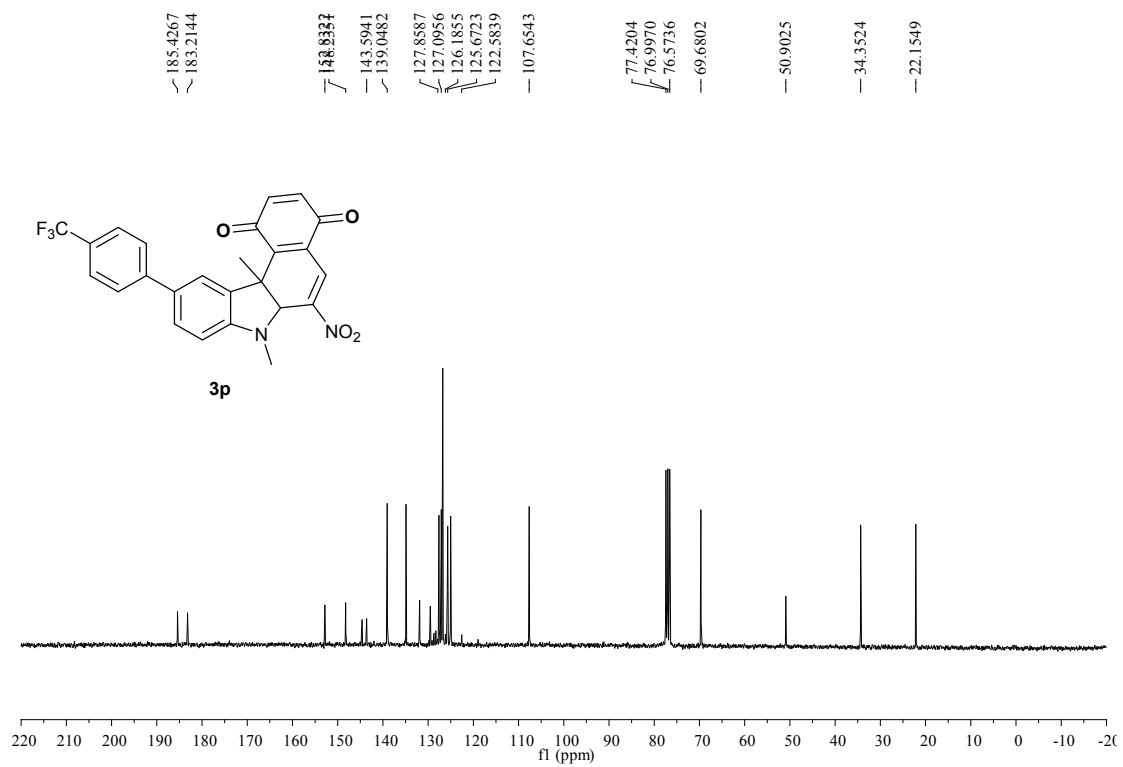

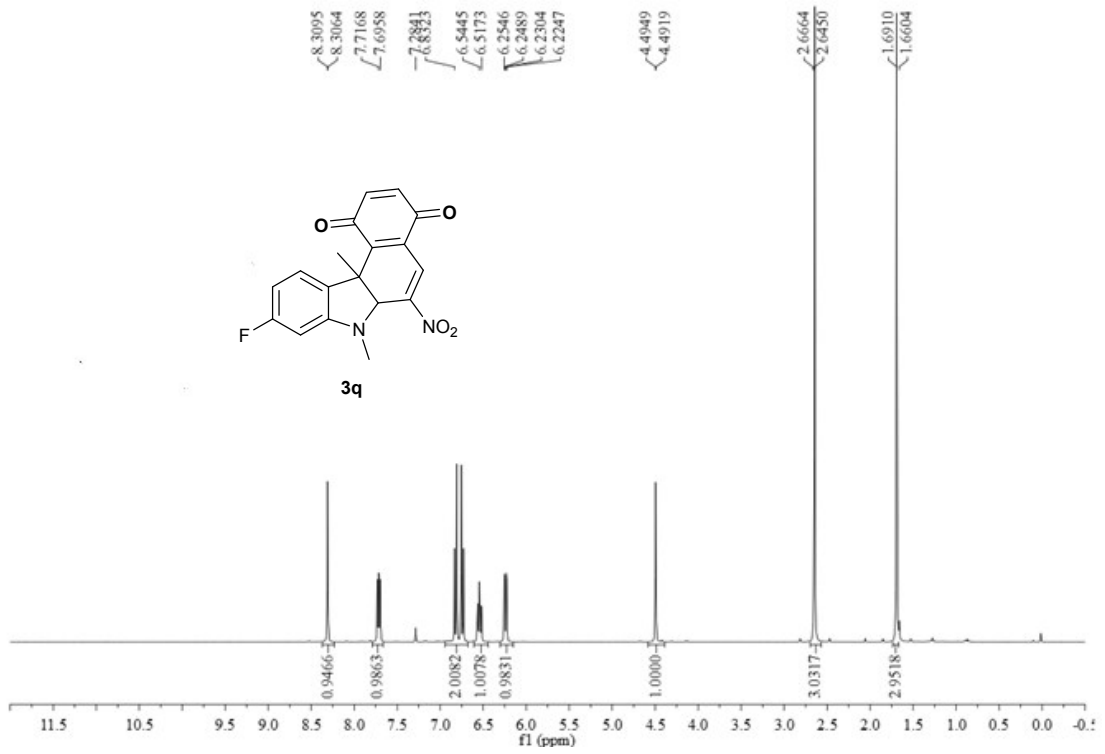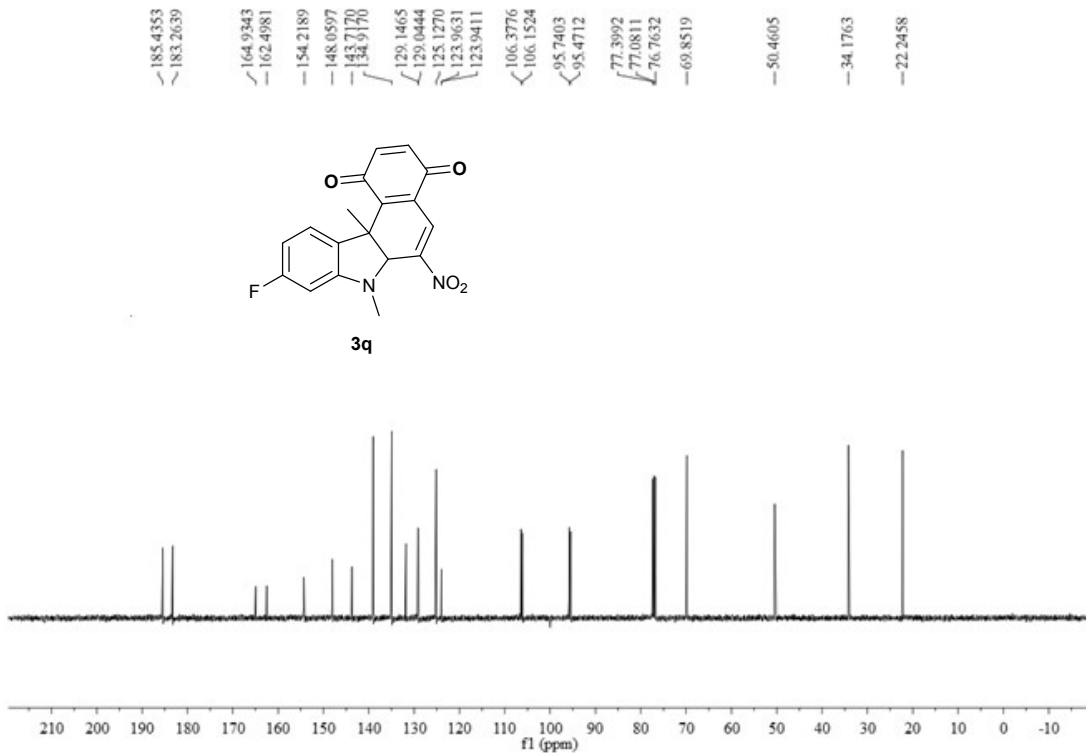

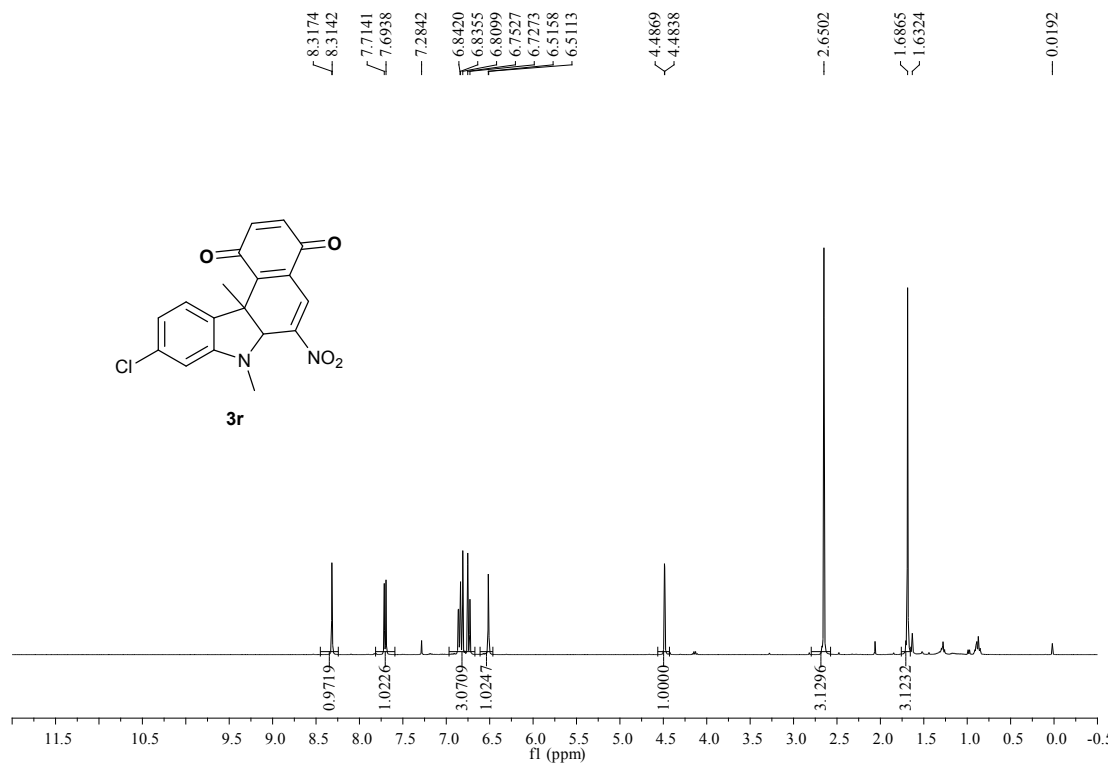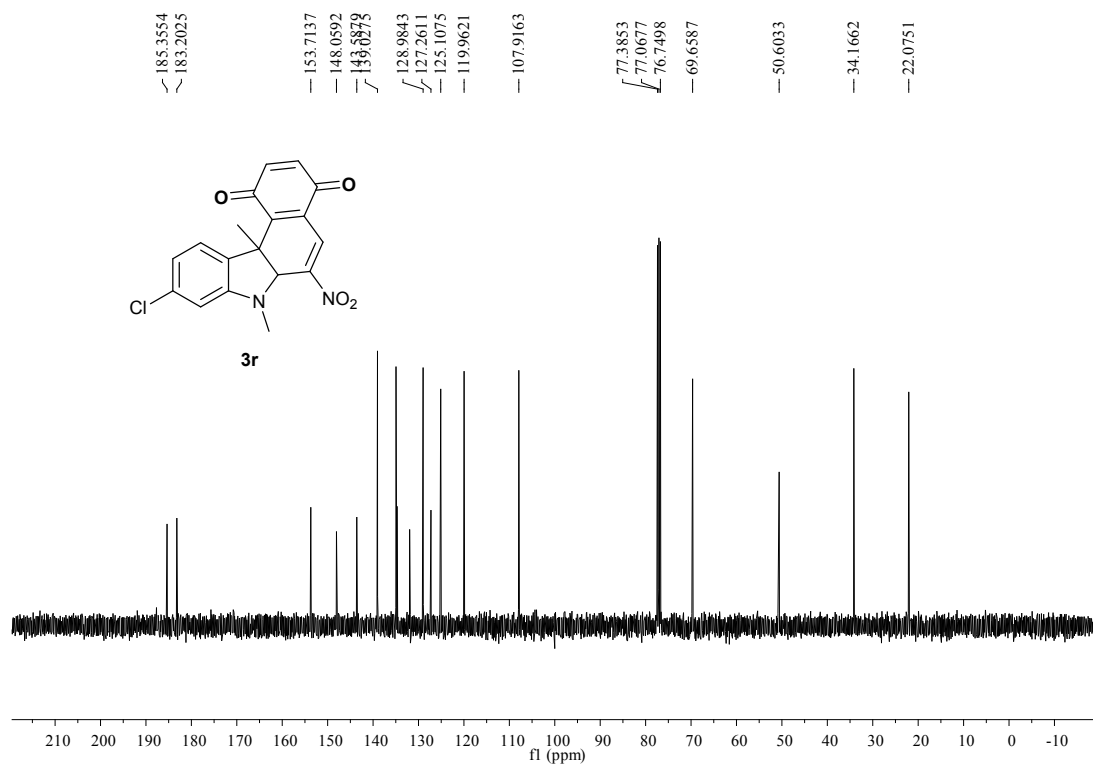

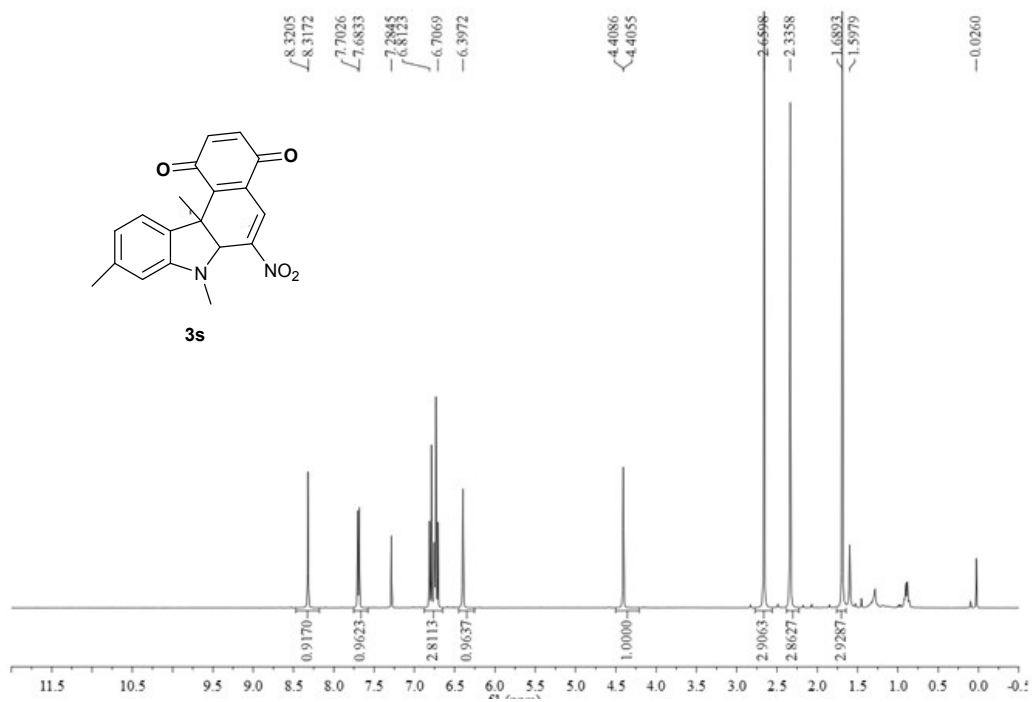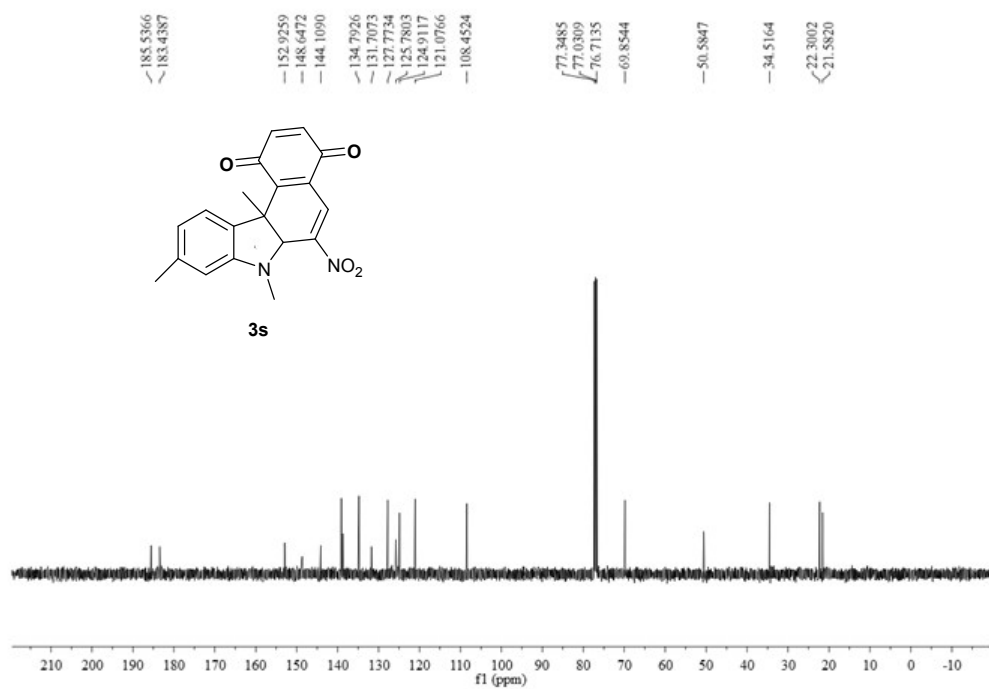

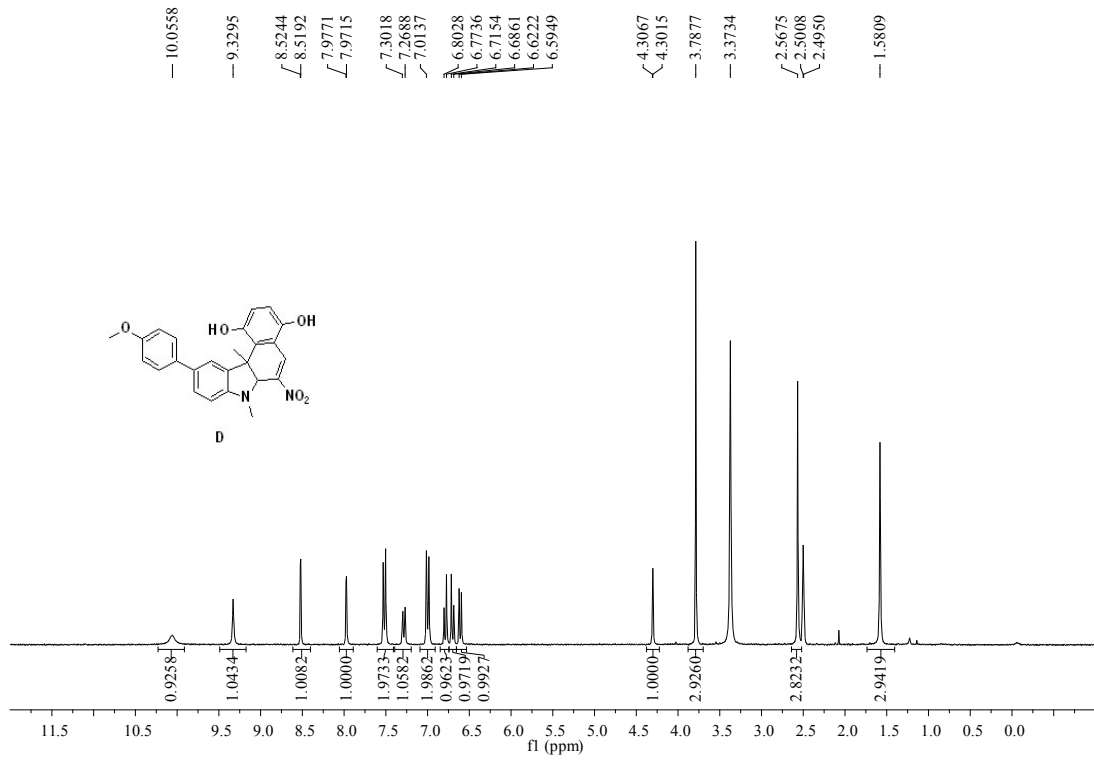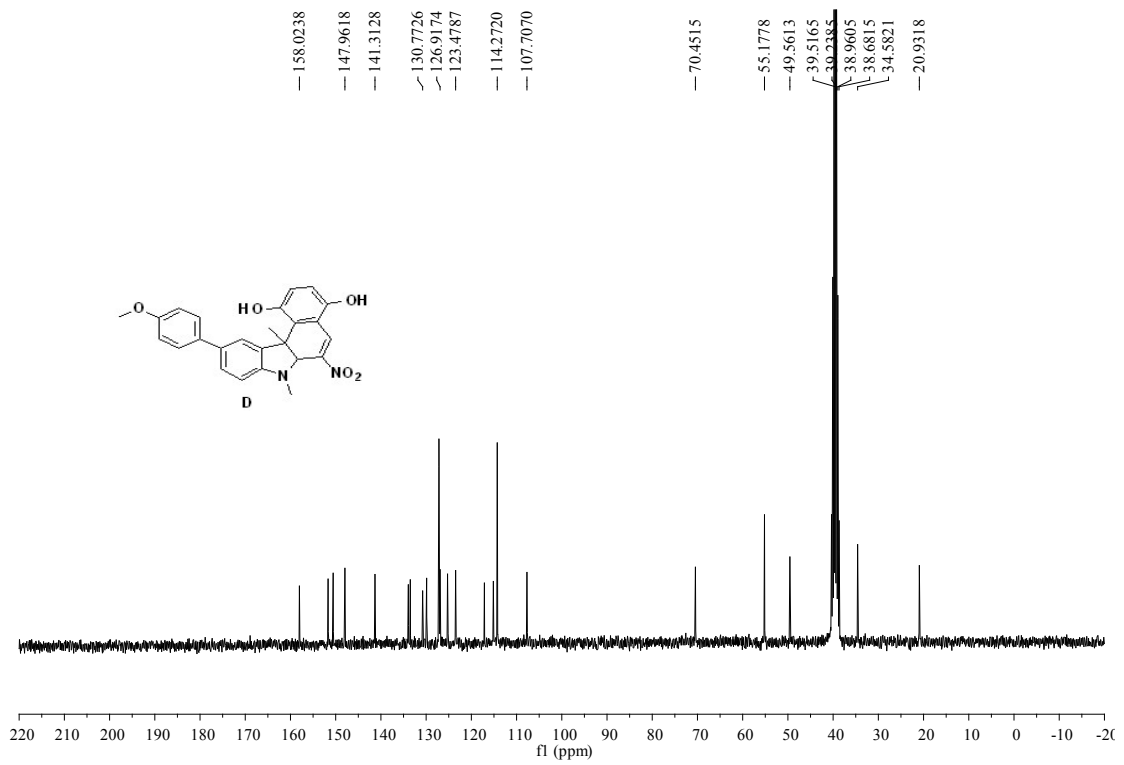



## Chiral HPLC chromatograms:

7,11b-dimethyl-6-nitro-7,11b-dihydro-1H-benzo[c]carbazole-1,4(6aH)-dione (**3a**)

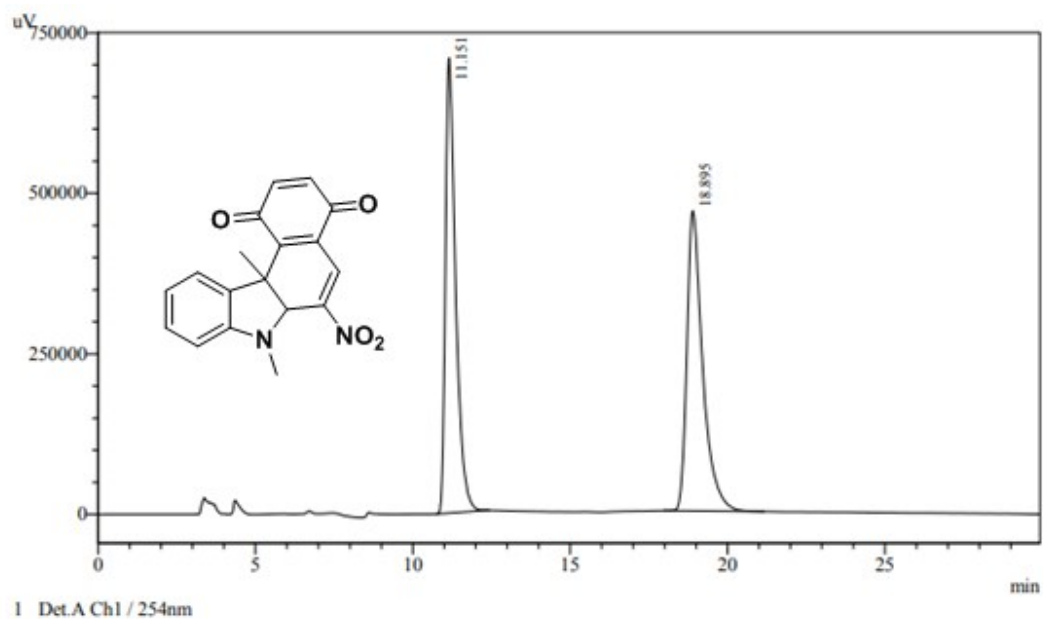

Detector A Ch1 254nm

| Peak# | Ret. Time | Area     | Height  | Area %  | Height % |
|-------|-----------|----------|---------|---------|----------|
| 1     | 11.151    | 15866273 | 708309  | 49.391  | 60.253   |
| 2     | 18.895    | 16257293 | 467246  | 50.609  | 39.747   |
| Total |           | 32123566 | 1175555 | 100.000 | 100.000  |

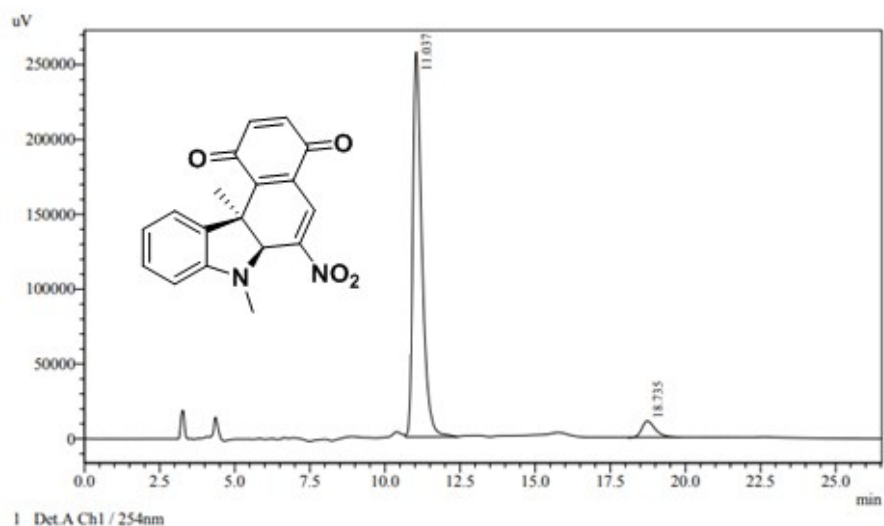

Detector A Ch1 254nm

| Peak# | Ret. Time | Area    | Height | Area %  | Height % |
|-------|-----------|---------|--------|---------|----------|
| 1     | 11.037    | 5441202 | 257151 | 94.020  | 95.881   |
| 2     | 18.735    | 346072  | 11047  | 5.980   | 4.119    |
| Total |           | 5787274 | 268198 | 100.000 | 100.000  |

7-allyl-11b-methyl-6-nitro-7,11b-dihydro-1H-benzo[c]carbazole-1,4(6aH)-dione (**3b**)

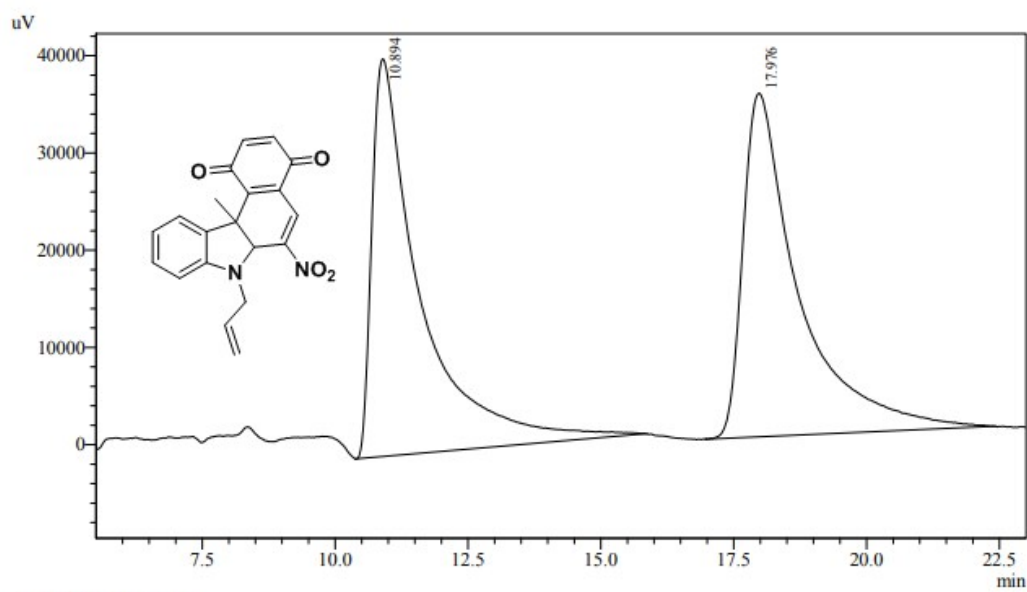

1 Det.A Ch1 / 254nm

Detector A Ch1 254nm

| Peak# | Ret. Time | Area    | Height | Area %  | Height % |
|-------|-----------|---------|--------|---------|----------|
| 1     | 10.894    | 2588240 | 40881  | 50.106  | 53.651   |
| 2     | 17.976    | 2577324 | 35317  | 49.894  | 46.349   |
| Total |           | 5165564 | 76198  | 100.000 | 100.000  |

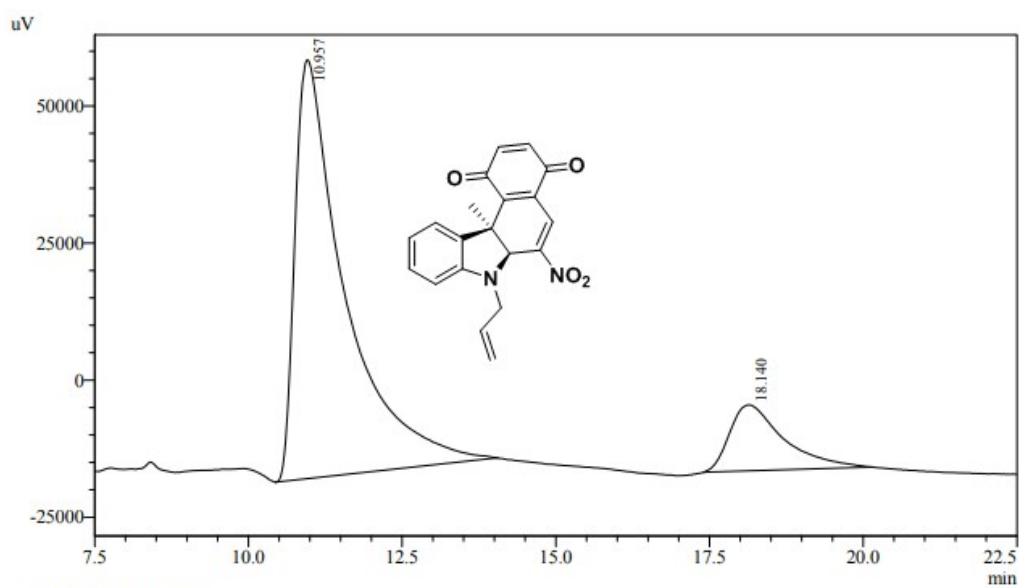

1 Det.A Ch1 / 254nm

Detector A Ch1 254nm

| Peak# | Ret. Time | Area    | Height | Area %  | Height % |
|-------|-----------|---------|--------|---------|----------|
| 1     | 10.957    | 4312088 | 76381  | 85.449  | 86.397   |
| 2     | 18.140    | 734296  | 12026  | 14.551  | 13.603   |
| Total |           | 5046384 | 88407  | 100.000 | 100.000  |

11b-methyl-6-nitro-7-propyl-7,11b-dihydro-1H-benzo[c]carbazole-1,4(6aH)-dione  
(3c)

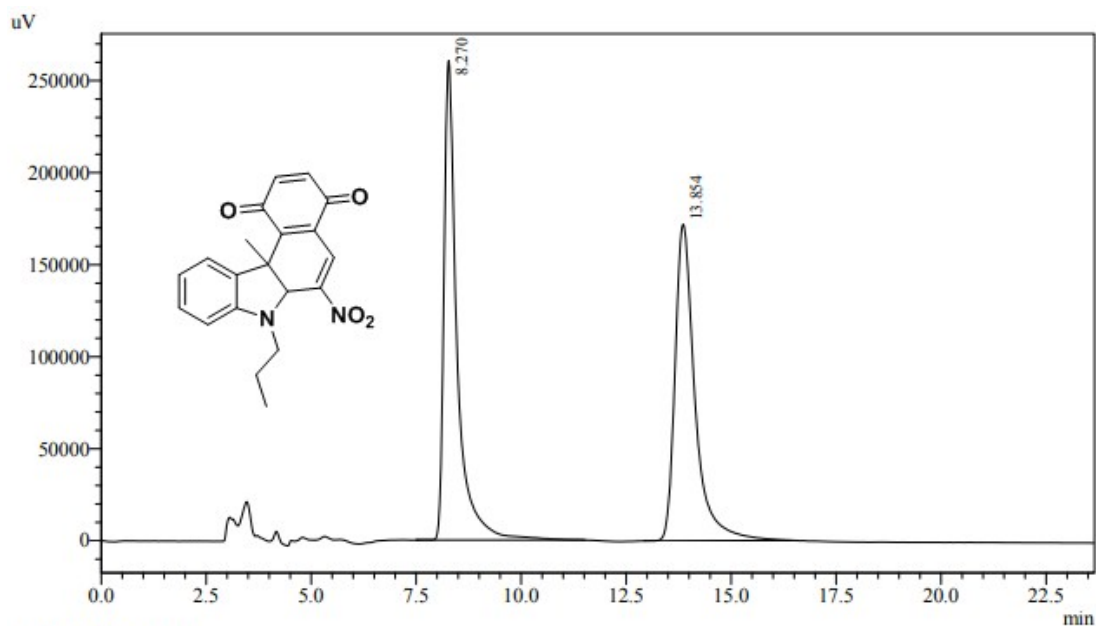

1 Det.A Ch1 / 254nm

Detector A Ch1 254nm

| Peak# | Ret. Time | Area     | Height | Area %  | Height % |
|-------|-----------|----------|--------|---------|----------|
| 1     | 8.270     | 5652433  | 260380 | 49.893  | 60.221   |
| 2     | 13.854    | 5676650  | 171995 | 50.107  | 39.779   |
| Total |           | 11329083 | 432375 | 100.000 | 100.000  |

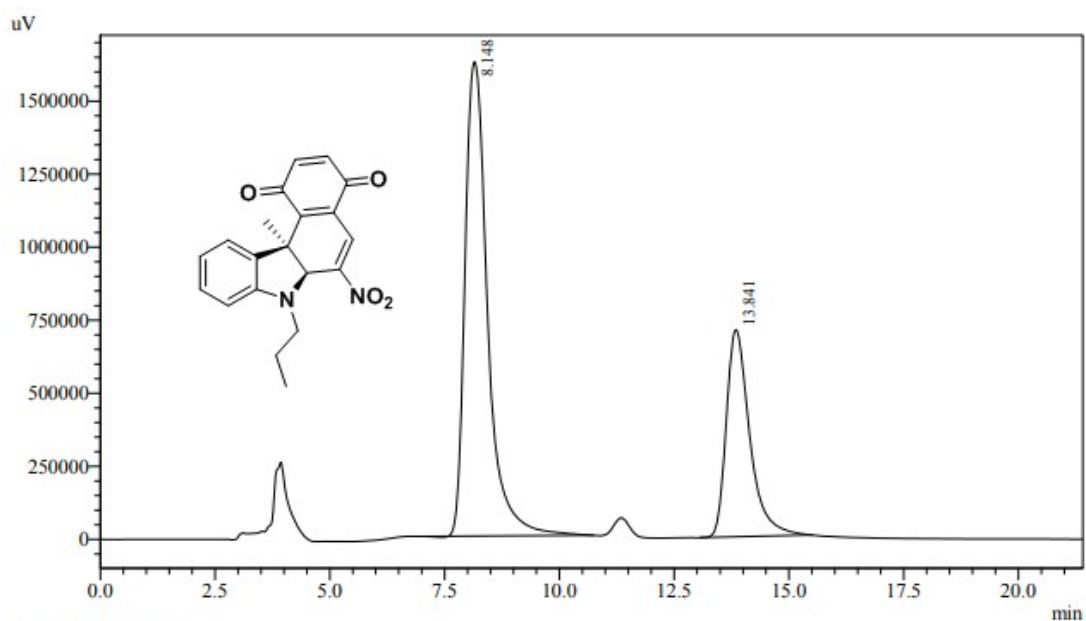

1 Det.A Ch1 / 254nm

Detector A Ch1 254nm

| Peak# | Ret. Time | Area     | Height  | Area %  | Height % |
|-------|-----------|----------|---------|---------|----------|
| 1     | 8.148     | 55354459 | 1622631 | 68.718  | 69.604   |
| 2     | 13.841    | 25198910 | 708608  | 31.282  | 30.396   |
| Total |           | 80553369 | 2331238 | 100.000 | 100.000  |

11b-methyl-6-nitro-7-(prop-2-yn-1-yl)-7,11b-dihydro-1H-benzo[c]carbazole-1,4(6aH)-dione (**3d**)

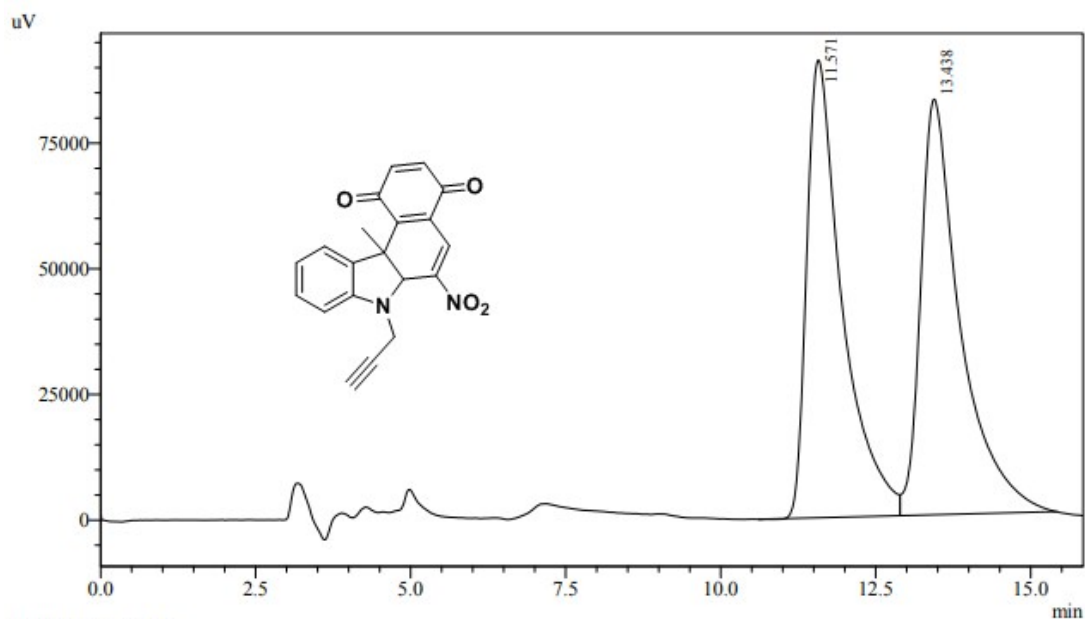

1 Det.A Ch1 / 254nm

Detector A Ch1 254nm

| Peak# | Ret. Time | Area    | Height | Area %  | Height % |
|-------|-----------|---------|--------|---------|----------|
| 1     | 11.571    | 3620754 | 91046  | 49.568  | 52.410   |
| 2     | 13.438    | 3683817 | 82672  | 50.432  | 47.590   |
| Total |           | 7304571 | 173717 | 100.000 | 100.000  |

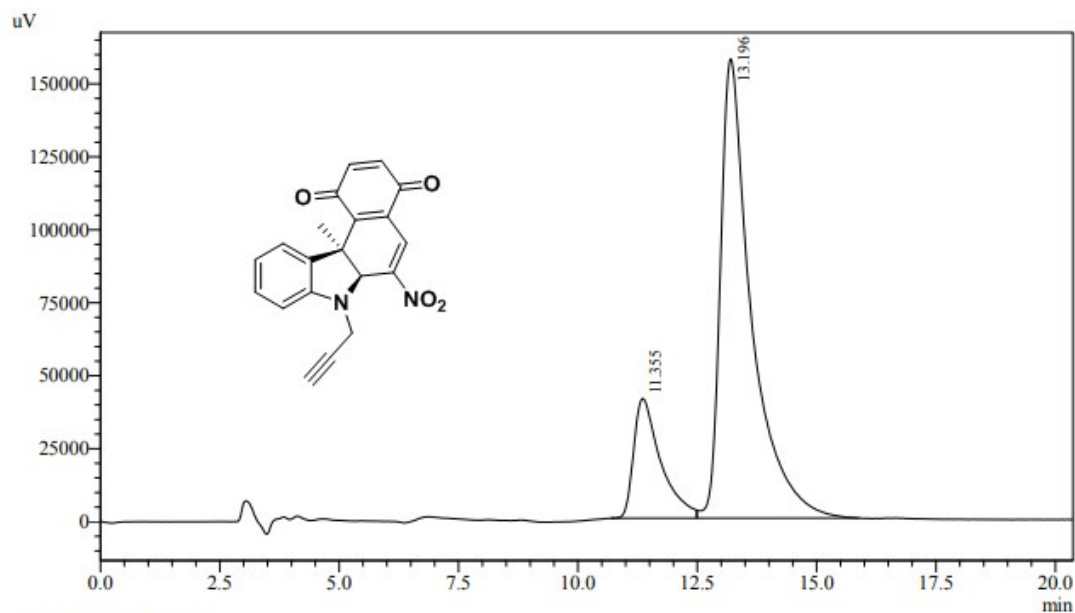

1 Det.A Ch1 / 254nm

Detector A Ch1 254nm

| Peak# | Ret. Time | Area    | Height | Area %  | Height % |
|-------|-----------|---------|--------|---------|----------|
| 1     | 11.355    | 1610365 | 40965  | 18.544  | 20.665   |
| 2     | 13.196    | 7073472 | 157271 | 81.456  | 79.335   |
| Total |           | 8683837 | 198236 | 100.000 | 100.000  |

7-benzyl-11b-methyl-6-nitro-7,11b-dihydro-1H-benzo[c]car-bazole-1,4(6aH)-dione  
(3e)

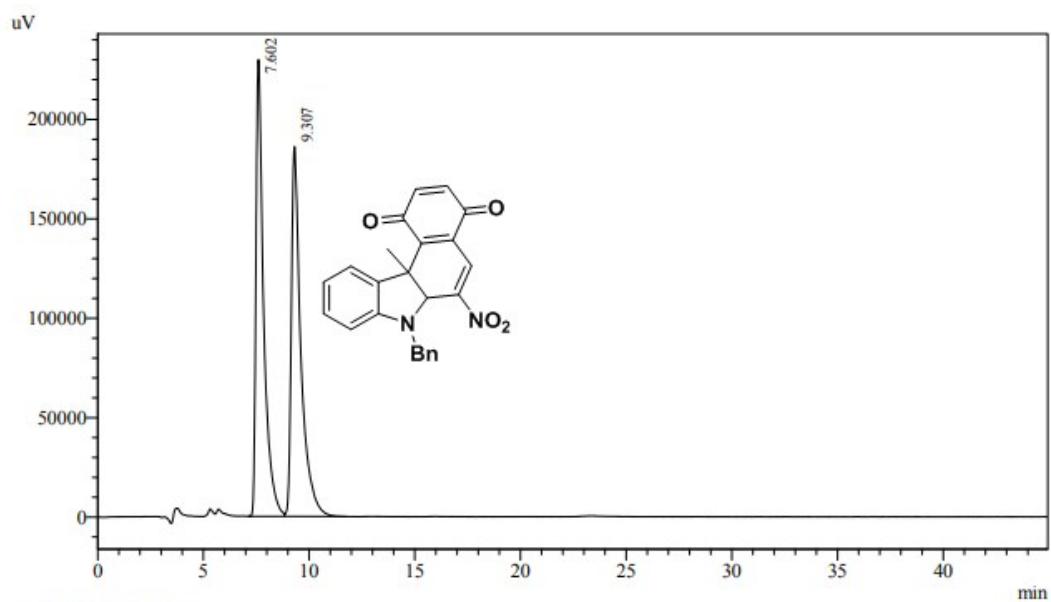

1 Det.A Ch1 / 254nm

Detector A Ch1 254nm

| Peak# | Ret. Time | Area     | Height | Area %  | Height % |
|-------|-----------|----------|--------|---------|----------|
| 1     | 7.602     | 5809431  | 229613 | 49.880  | 55.253   |
| 2     | 9.307     | 5837406  | 185952 | 50.120  | 44.747   |
| Total |           | 11646837 | 415564 | 100.000 | 100.000  |

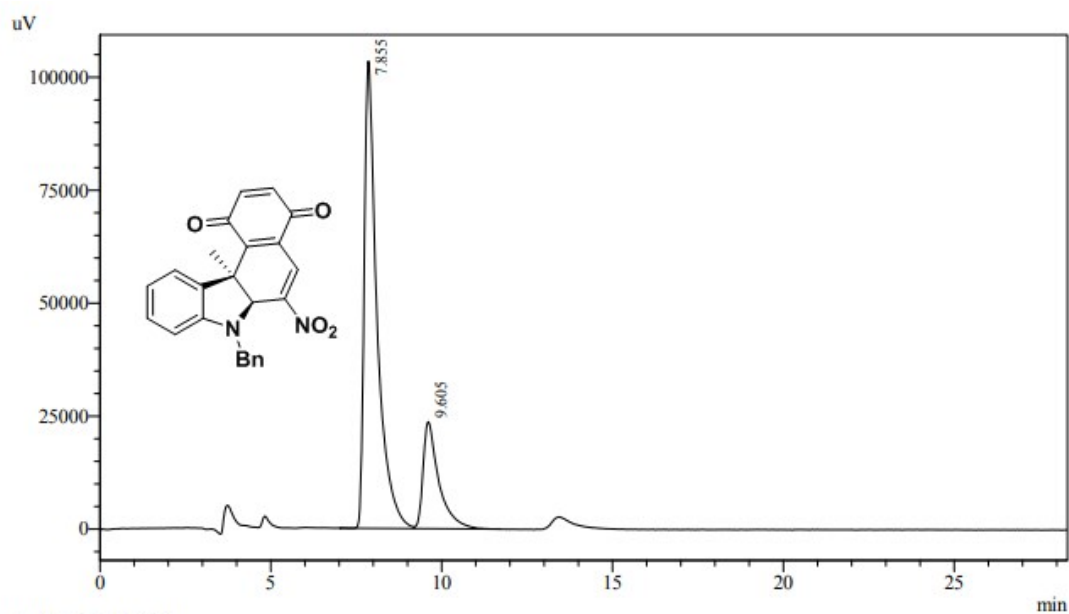

1 Det.A Ch1 / 254nm

Detector A Ch1 254nm

| Peak# | Ret. Time | Area    | Height | Area %  | Height % |
|-------|-----------|---------|--------|---------|----------|
| 1     | 7.855     | 2694702 | 103388 | 78.091  | 81.371   |
| 2     | 9.605     | 756009  | 23669  | 21.909  | 18.629   |
| Total |           | 3450711 | 127057 | 100.000 | 100.000  |

7-(4-bromobenzyl)-11b-methyl-6-nitro-7,11b-dihydro-1H-benzo[c]carbazole-1,4(6aH)-dione (**3f**)

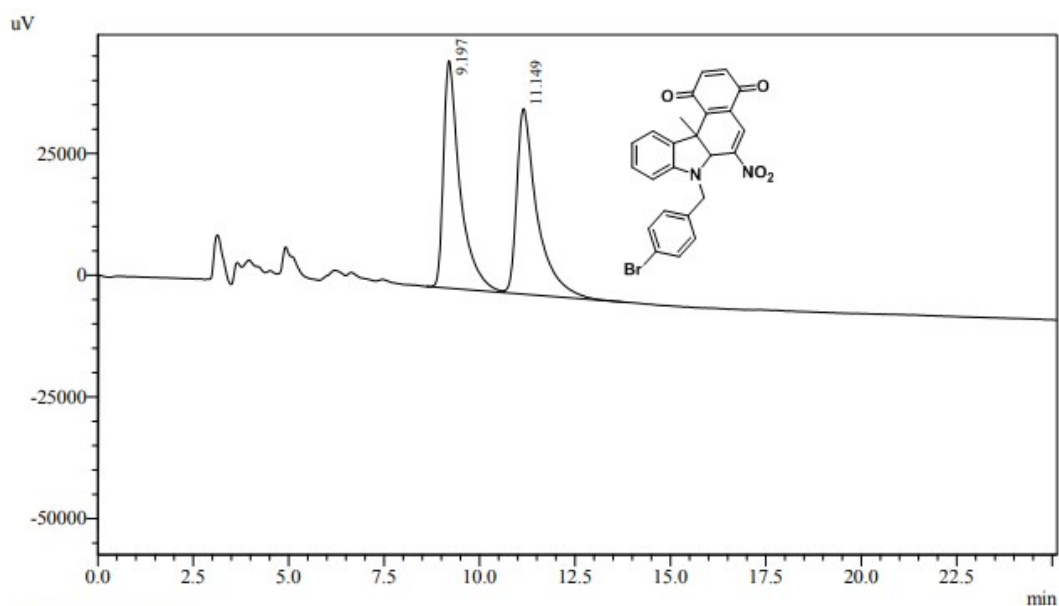

1 Det.A Ch1 / 254nm

Detector A Ch1 254nm

| Peak# | Ret. Time | Area    | Height | Area %  | Height % |
|-------|-----------|---------|--------|---------|----------|
| 1     | 9.197     | 1404617 | 46702  | 49.764  | 55.066   |
| 2     | 11.149    | 1417939 | 38109  | 50.236  | 44.934   |
| Total |           | 2822557 | 84811  | 100.000 | 100.000  |

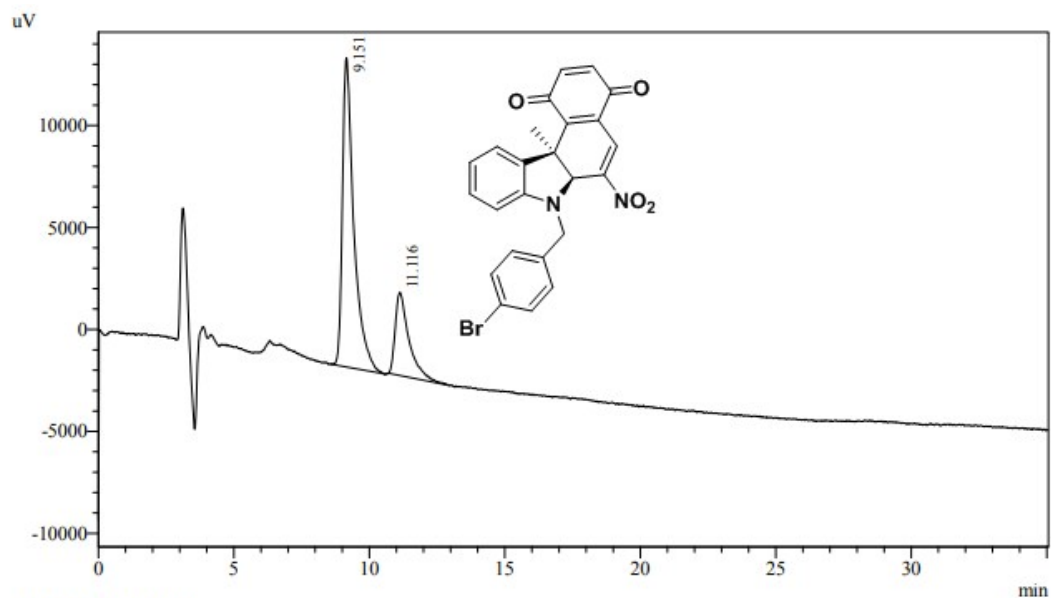

1 Det.A Ch1 / 254nm

Detector A Ch1 254nm

| Peak# | Ret. Time | Area   | Height | Area %  | Height % |
|-------|-----------|--------|--------|---------|----------|
| 1     | 9.151     | 442319 | 15150  | 75.417  | 78.845   |
| 2     | 11.116    | 144176 | 4065   | 24.583  | 21.155   |
| Total |           | 586496 | 19215  | 100.000 | 100.000  |

11b-(2-methoxyethyl)-7-methyl-6-nitro-7,11b-dihydro-1H-be-nzo[c]carbazole-1,4(6aH)-dione (**3g**)

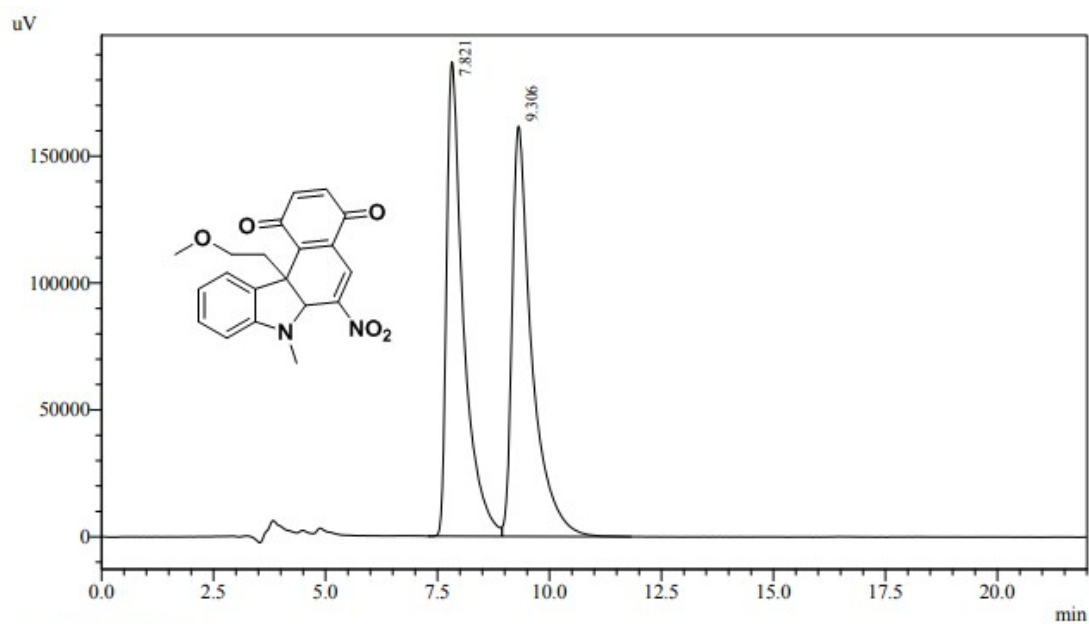

1 Det.A Ch1 / 254nm

Detector A Ch1 254nm

| Peak# | Ret. Time | Area    | Height | Area %  | Height % |
|-------|-----------|---------|--------|---------|----------|
| 1     | 7.821     | 4895234 | 186887 | 49.725  | 53.619   |
| 2     | 9.306     | 4949324 | 161657 | 50.275  | 46.381   |
| Total |           | 9844557 | 348544 | 100.000 | 100.000  |

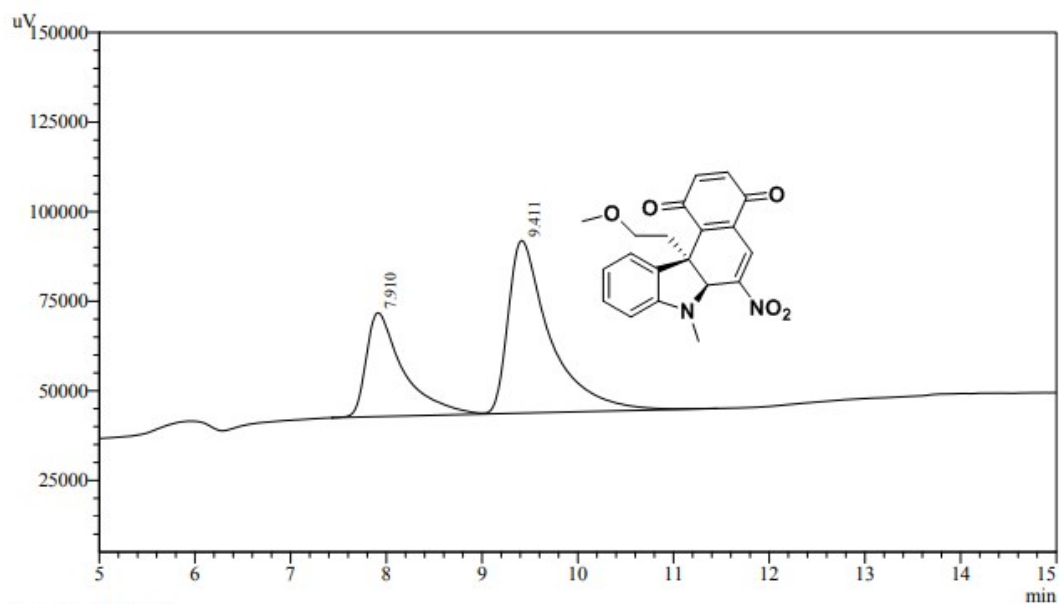

1 Det.A Ch1 / 254nm

Detector A Ch1 254nm

| Peak# | Ret. Time | Area    | Height | Area %  | Height % |
|-------|-----------|---------|--------|---------|----------|
| 1     | 7.910     | 779054  | 28977  | 34.658  | 37.564   |
| 2     | 9.411     | 1468752 | 48163  | 65.342  | 62.436   |
| Total |           | 2247806 | 77139  | 100.000 | 100.000  |

10-fluoro-7,11b-dimethyl-6-nitro-7,11b-dihydro-1H-benzo[c]carbazole-1,4(6aH)-dione (**3h**)

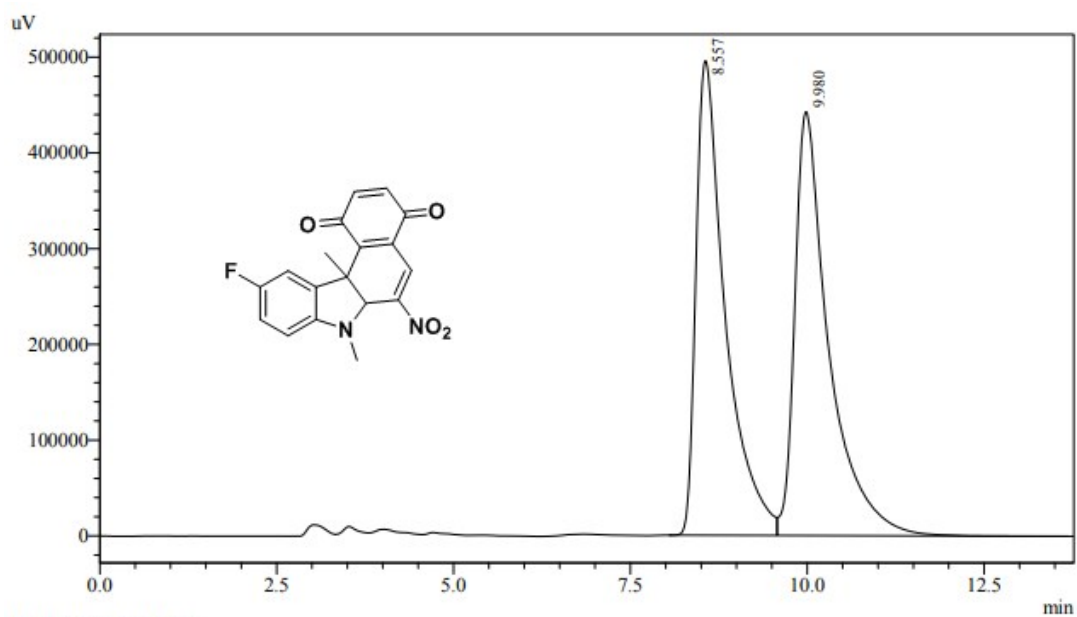

1 Det.A Ch1 / 254nm

Detector A Ch1 254nm

| Peak# | Ret. Time | Area     | Height | Area %  | Height % |
|-------|-----------|----------|--------|---------|----------|
| 1     | 8.557     | 14285197 | 495528 | 49.178  | 52.820   |
| 2     | 9.980     | 14762833 | 442610 | 50.822  | 47.180   |
| Total |           | 29048030 | 938138 | 100.000 | 100.000  |



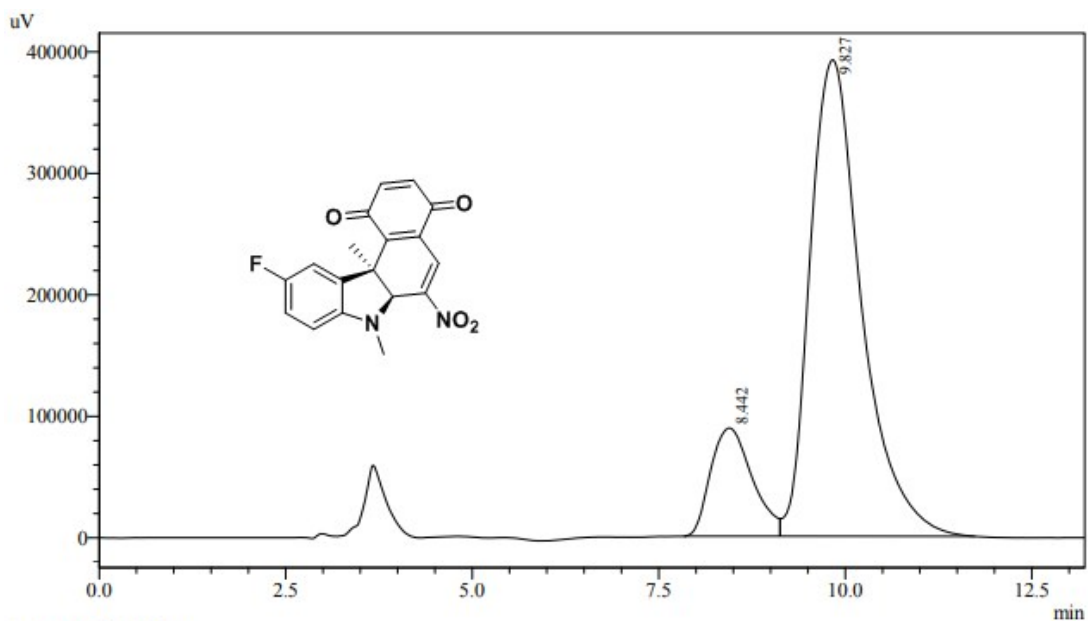

1 Det.A Ch1 / 254nm

Detector A Ch1 254nm

| Peak# | Ret. Time | Area     | Height | Area %  | Height % |
|-------|-----------|----------|--------|---------|----------|
| 1     | 8.442     | 3461720  | 88955  | 15.515  | 18.491   |
| 2     | 9.827     | 18851053 | 392106 | 84.485  | 81.509   |
| Total |           | 22312773 | 481060 | 100.000 | 100.000  |

10-chloro-7,11b-dimethyl-6-nitro-7,11b-dihydro-1H-benzo[c]carbazole-1,4(6aH)-dione (**3i**)

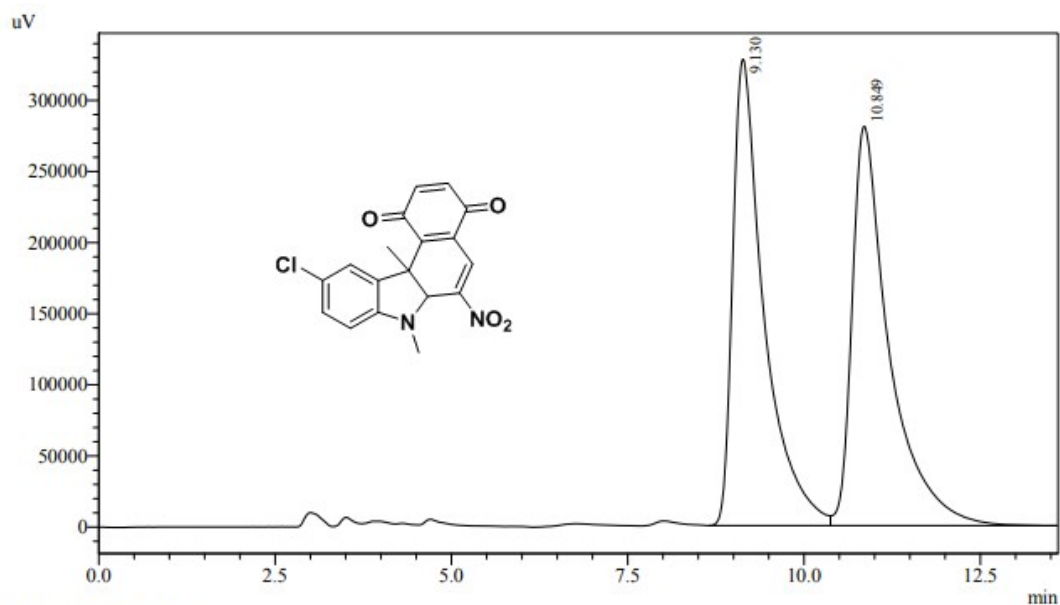

1 Det.A Ch1 / 254nm

Detector A Ch1 254nm

| Peak# | Ret. Time | Area     | Height | Area %  | Height % |
|-------|-----------|----------|--------|---------|----------|
| 1     | 9.130     | 10122449 | 327942 | 49.624  | 53.877   |
| 2     | 10.849    | 10275920 | 280741 | 50.376  | 46.123   |
| Total |           | 20398368 | 608683 | 100.000 | 100.000  |

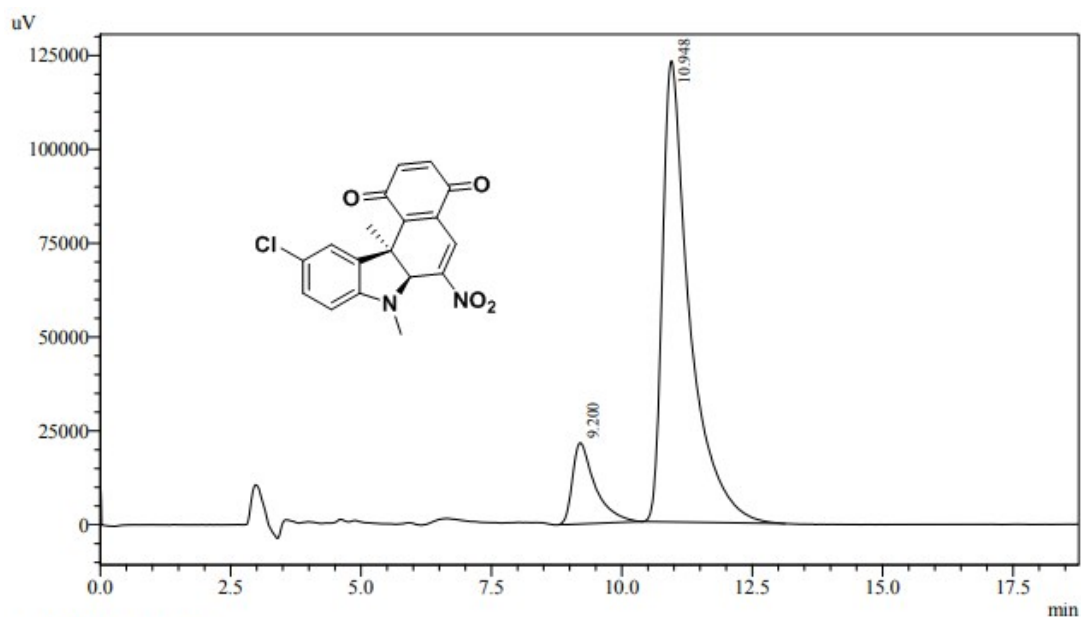

1 Det.A Ch1 / 254nm

Detector A Ch1 254nm

| Peak# | Ret. Time | Area    | Height | Area %  | Height % |
|-------|-----------|---------|--------|---------|----------|
| 1     | 9.200     | 650023  | 21583  | 12.740  | 14.953   |
| 2     | 10.948    | 4452214 | 122762 | 87.260  | 85.047   |
| Total |           | 5102237 | 144345 | 100.000 | 100.000  |

10-bromo-7,11b-dimethyl-6-nitro-7,11b-dihydro-1H-benz-o[c]carbazole-1,4(6aH)-dione (**3j**)

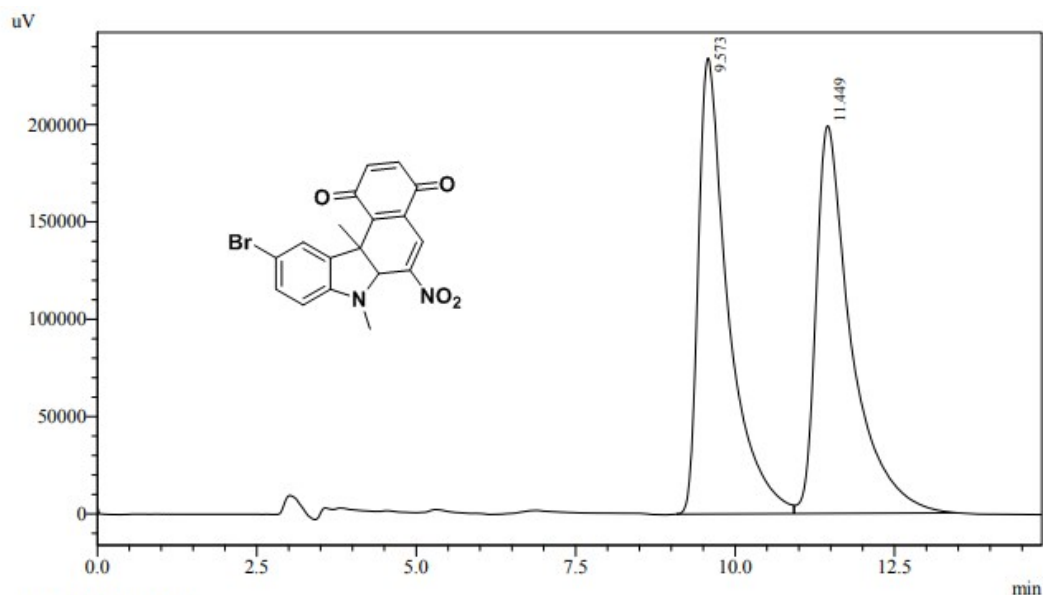

1 Det.A Ch1 / 254nm

Detector A Ch1 254nm

| Peak# | Ret. Time | Area     | Height | Area %  | Height % |
|-------|-----------|----------|--------|---------|----------|
| 1     | 9.573     | 7612115  | 234248 | 49.942  | 54.047   |
| 2     | 11.449    | 7629855  | 199169 | 50.058  | 45.953   |
| Total |           | 15241971 | 433417 | 100.000 | 100.000  |

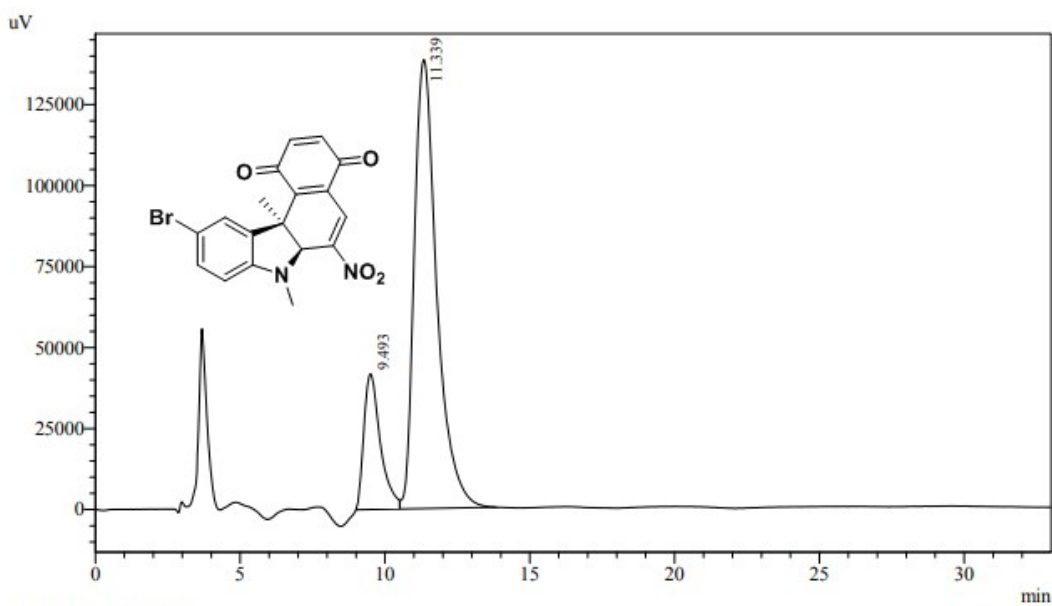

Detector A Ch1 254nm

| Peak# | Ret. Time | Area    | Height | Area %  | Height % |
|-------|-----------|---------|--------|---------|----------|
| 1     | 9.493     | 1657319 | 41845  | 18.134  | 23.197   |
| 2     | 11.339    | 7481962 | 138549 | 81.866  | 76.803   |
| Total |           | 9139281 | 180394 | 100.000 | 100.000  |

10-methoxy-7,11b-dimethyl-6-nitro-7,11b-dihydro-1H-benzo[c]carbazole-1,4(6aH)-dione (**3k**)

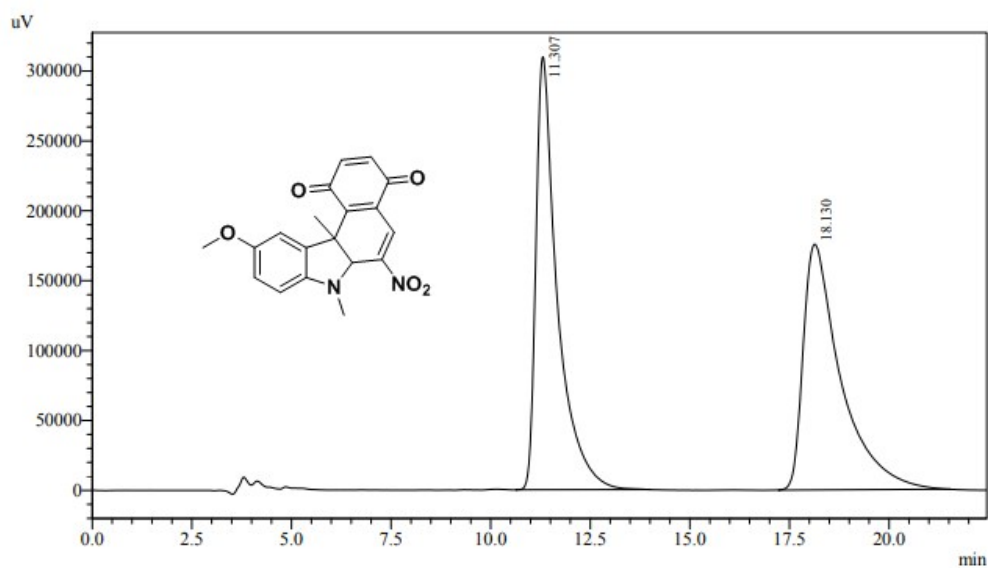

Detector A Ch1 254nm

| Peak# | Ret. Time | Area     | Height | Area %  | Height % |
|-------|-----------|----------|--------|---------|----------|
| 1     | 11.307    | 11580811 | 309655 | 50.188  | 63.793   |
| 2     | 18.130    | 11494076 | 175754 | 49.812  | 36.207   |
| Total |           | 23074887 | 485409 | 100.000 | 100.000  |

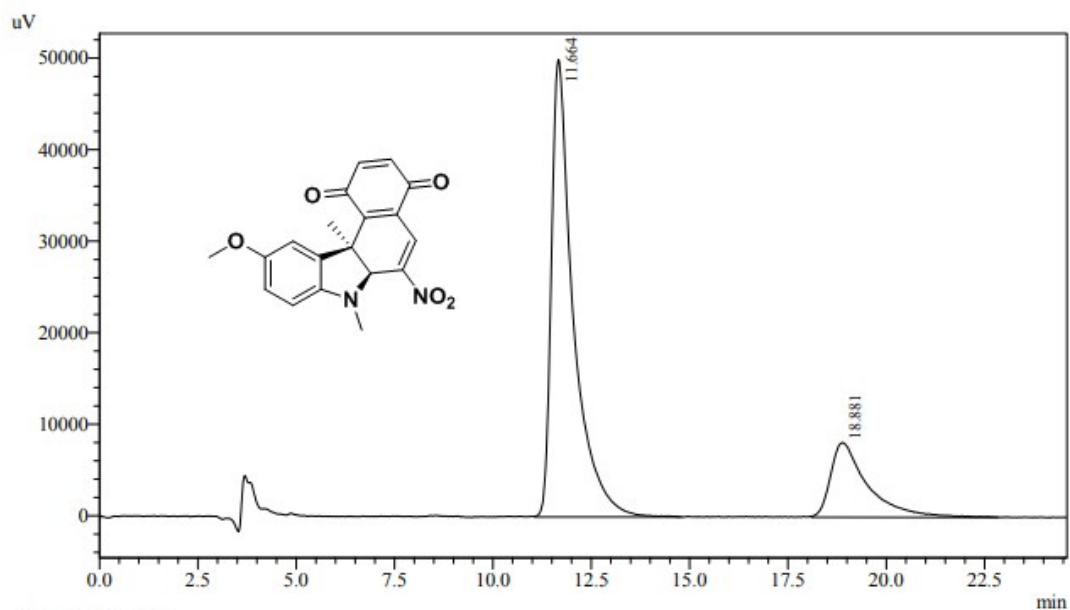

1 Det.A Ch1 / 254nm

Detector A Ch1 254nm

| Peak# | Ret. Time | Area    | Height | Area %  | Height % |
|-------|-----------|---------|--------|---------|----------|
| 1     | 11.664    | 1931369 | 49949  | 78.429  | 85.959   |
| 2     | 18.881    | 531193  | 8159   | 21.571  | 14.041   |
| Total |           | 2462562 | 58108  | 100.000 | 100.000  |

10-(benzyloxy)-7,11b-dimethyl-6-nitro-7,11b-dihydro-1H-benzo[c]carbazole-1,4(6aH)-dione (**31**)

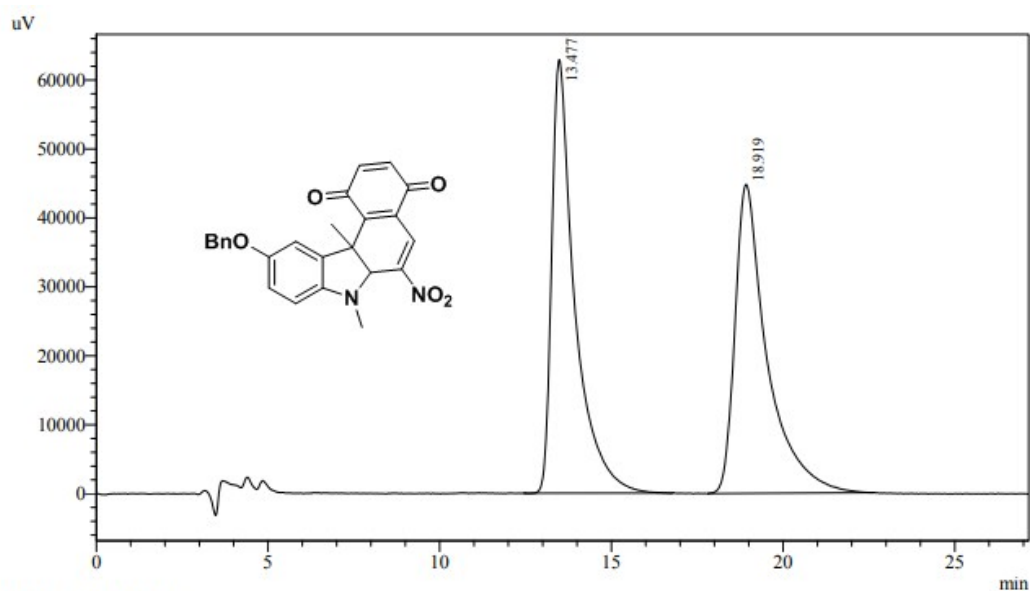

1 Det.A Ch1 / 254nm

Detector A Ch1 254nm

| Peak# | Ret. Time | Area    | Height | Area %  | Height % |
|-------|-----------|---------|--------|---------|----------|
| 1     | 13.477    | 2924468 | 62872  | 50.152  | 58.388   |
| 2     | 18.919    | 2906743 | 44808  | 49.848  | 41.612   |
| Total |           | 5831211 | 107680 | 100.000 | 100.000  |

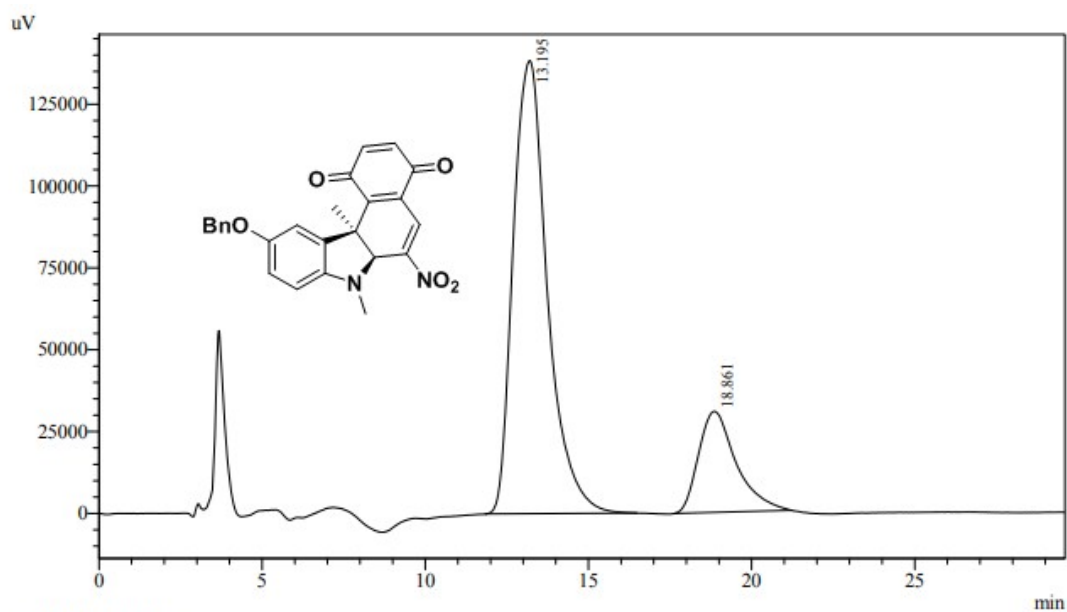

1 Det.A Ch1 / 254nm

Detector A Ch1 254nm

| Peak# | Ret. Time | Area     | Height | Area %  | Height % |
|-------|-----------|----------|--------|---------|----------|
| 1     | 13.195    | 10087525 | 138391 | 80.330  | 81.768   |
| 2     | 18.861    | 2470037  | 30858  | 19.670  | 18.232   |
| Total |           | 12557562 | 169248 | 100.000 | 100.000  |

7,11b-dimethyl-6-nitro-10-(m-tolyl)-7,11b-dihydro-1H-ben-zo[c]carbazole-1,4(6aH)-dione (**3m**)

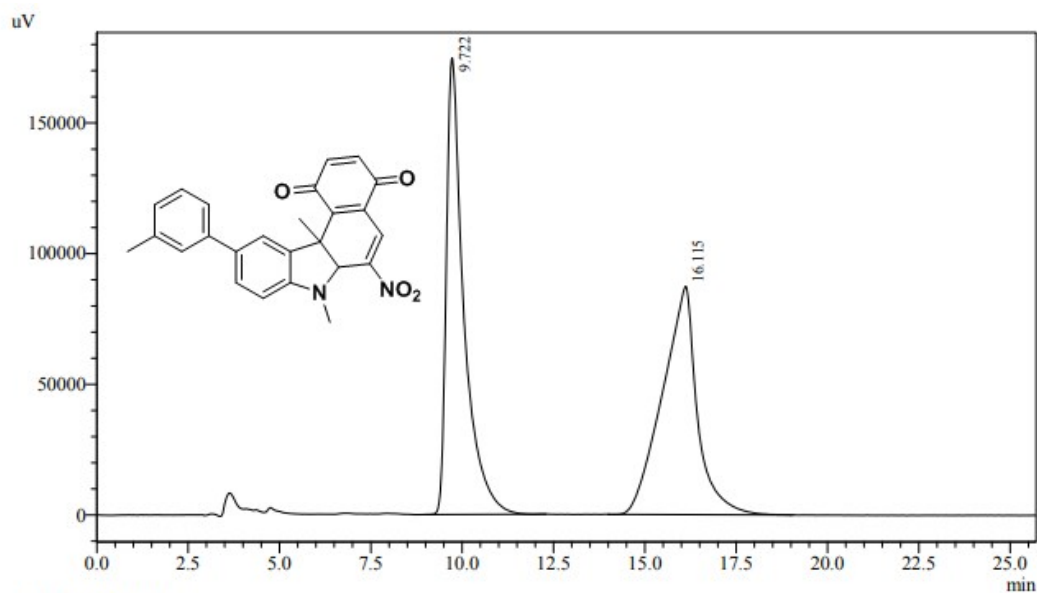

1 Det.A Ch1 / 254nm

Detector A Ch1 254nm

| Peak# | Ret. Time | Area     | Height | Area %  | Height % |
|-------|-----------|----------|--------|---------|----------|
| 1     | 9.722     | 5817680  | 174636 | 50.097  | 66.663   |
| 2     | 16.115    | 5795178  | 87332  | 49.903  | 33.337   |
| Total |           | 11612858 | 261968 | 100.000 | 100.000  |

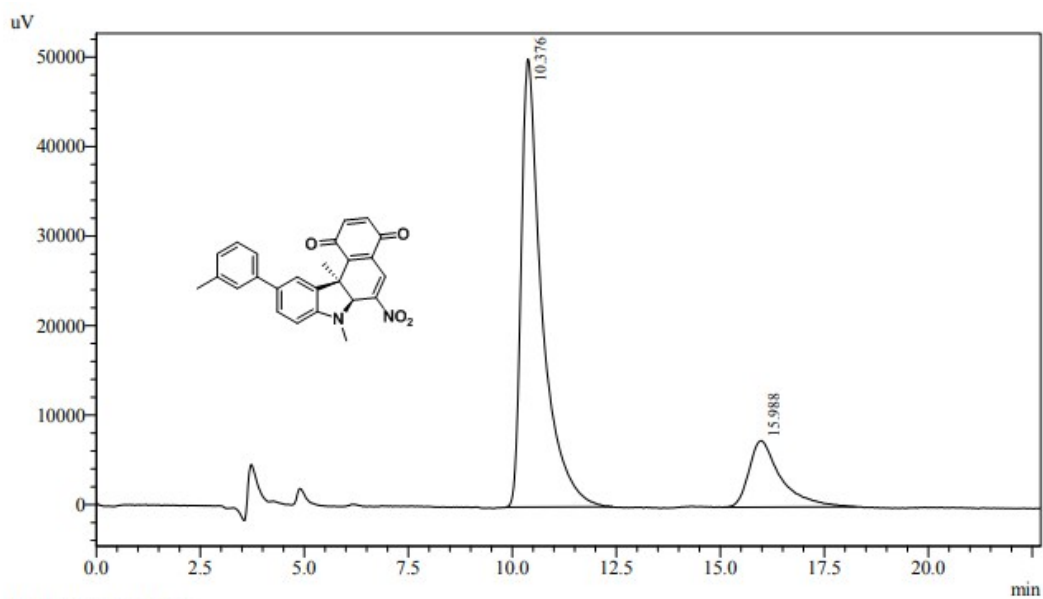

Detector A Ch1 254nm

| Peak# | Ret. Time | Area    | Height | Area %  | Height % |
|-------|-----------|---------|--------|---------|----------|
| 1     | 10.376    | 1742331 | 50042  | 81.452  | 87.074   |
| 2     | 15.988    | 396747  | 7429   | 18.548  | 12.926   |
| Total |           | 2139078 | 57471  | 100.000 | 100.000  |

10-(4-methoxyphenyl)-7,11b-dimethyl-6-nitro-7,11b-dihydro-1H-benzo[c]carbazole-1,4(6aH)-dione (**3n**)

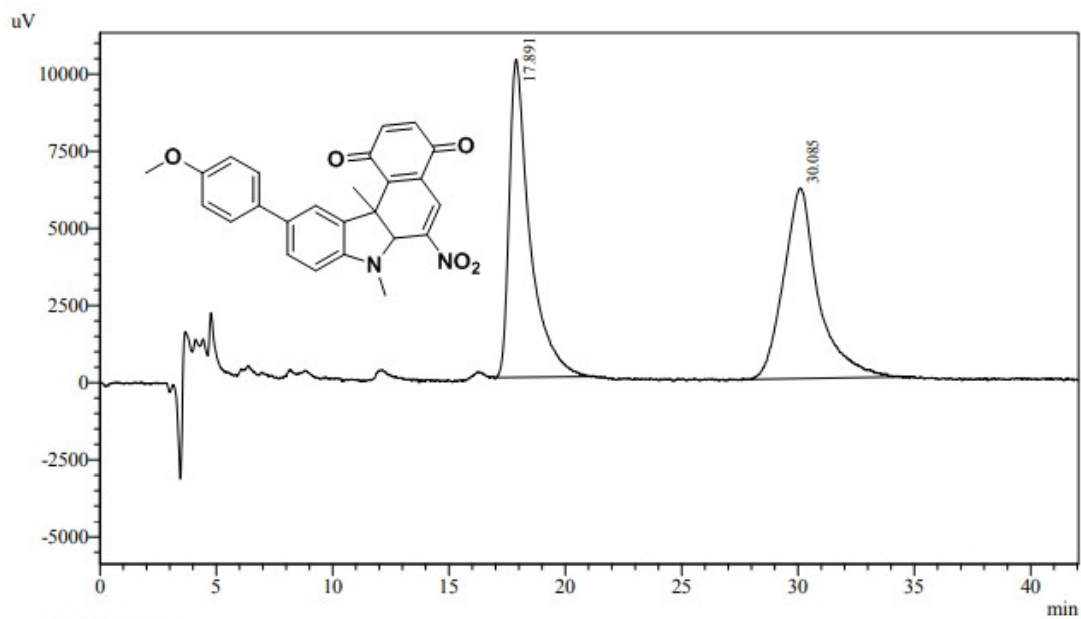

1 Det.A Ch1 / 254nm

Detector A Ch1 254nm

| Peak# | Ret. Time | Area    | Height | Area %  | Height % |
|-------|-----------|---------|--------|---------|----------|
| 1     | 17.891    | 635625  | 10304  | 49.798  | 62.521   |
| 2     | 30.085    | 640770  | 6177   | 50.202  | 37.479   |
| Total |           | 1276396 | 16481  | 100.000 | 100.000  |

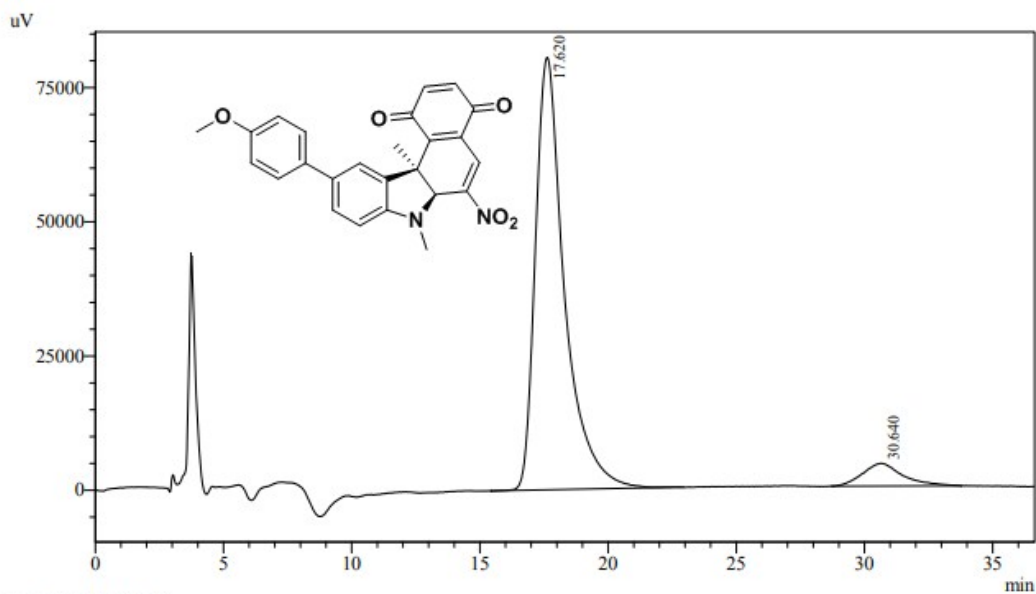

1 Det.A Ch1 / 254nm

Detector A Ch1 254nm

| Peak# | Ret. Time | Area    | Height | Area %  | Height % |
|-------|-----------|---------|--------|---------|----------|
| 1     | 17.620    | 6339612 | 80537  | 93.240  | 95.012   |
| 2     | 30.640    | 459609  | 4228   | 6.760   | 4.988    |
| Total |           | 6799221 | 84765  | 100.000 | 100.000  |

10-(4-fluorophenyl)-7,11b-dimethyl-6-nitro-7,11b-dihydro-1H-benzo[c]carbazole-1,4(6aH)-dione (**30**)

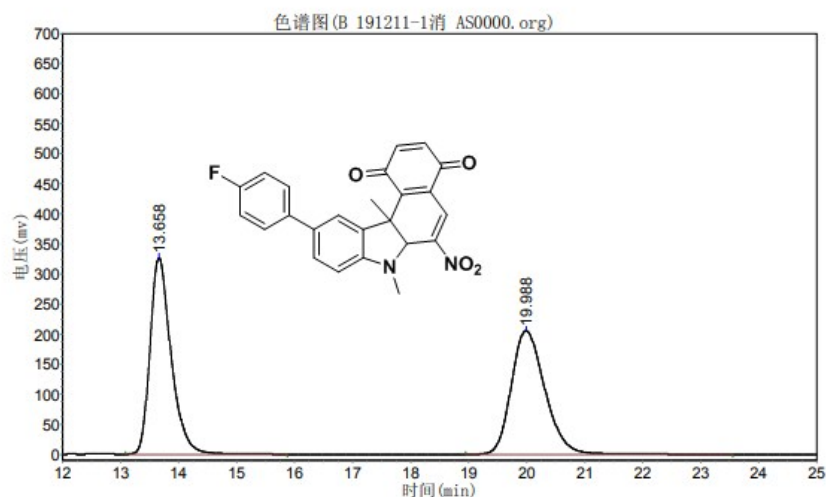

分析结果表

| 峰号 | 峰名 | 保留时间   | 峰高         | 峰面积          | 含量       |
|----|----|--------|------------|--------------|----------|
| 1  |    | 13.658 | 326499.781 | 8225915.000  | 49.9052  |
| 2  |    | 19.988 | 205685.391 | 8257153.000  | 50.0948  |
| 总计 |    |        | 532185.172 | 16483068.000 | 100.0000 |

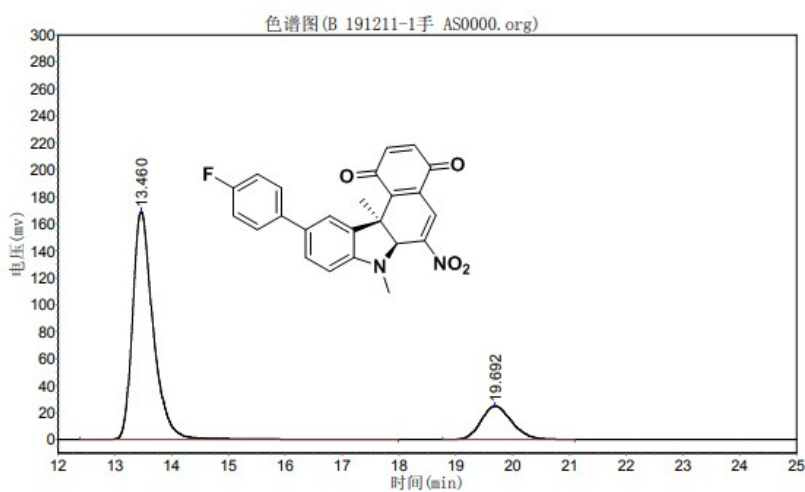

分析结果表

| 峰号 | 峰名 | 保留时间   | 峰高         | 峰面积         | 含量       |
|----|----|--------|------------|-------------|----------|
| 1  |    | 13.460 | 168782.953 | 4259817.500 | 82.1246  |
| 2  |    | 19.692 | 24644.600  | 927202.563  | 17.8754  |
| 总计 |    |        | 193427.553 | 5187020.063 | 100.0000 |

7,11b-dimethyl-6-nitro-10-(4-(trifluoromethyl)phenyl)-7,11b-dihydro-1H-benzo-[c]carbazole-1,4(6aH)-dione (**3p**)



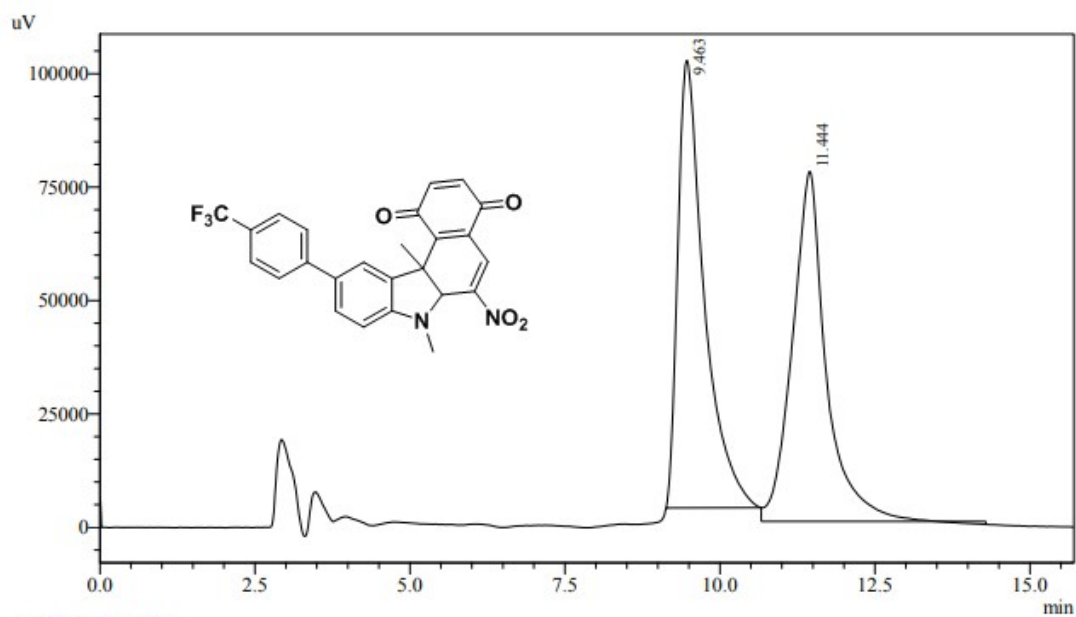

1 Det.A Ch1 / 254nm

Detector A Ch1 254nm

| Peak# | Ret. Time | Area    | Height | Area %  | Height % |
|-------|-----------|---------|--------|---------|----------|
| 1     | 9.463     | 2923044 | 98594  | 50.150  | 56.105   |
| 2     | 11.444    | 2905513 | 77136  | 49.850  | 43.895   |
| Total |           | 5828557 | 175730 | 100.000 | 100.000  |

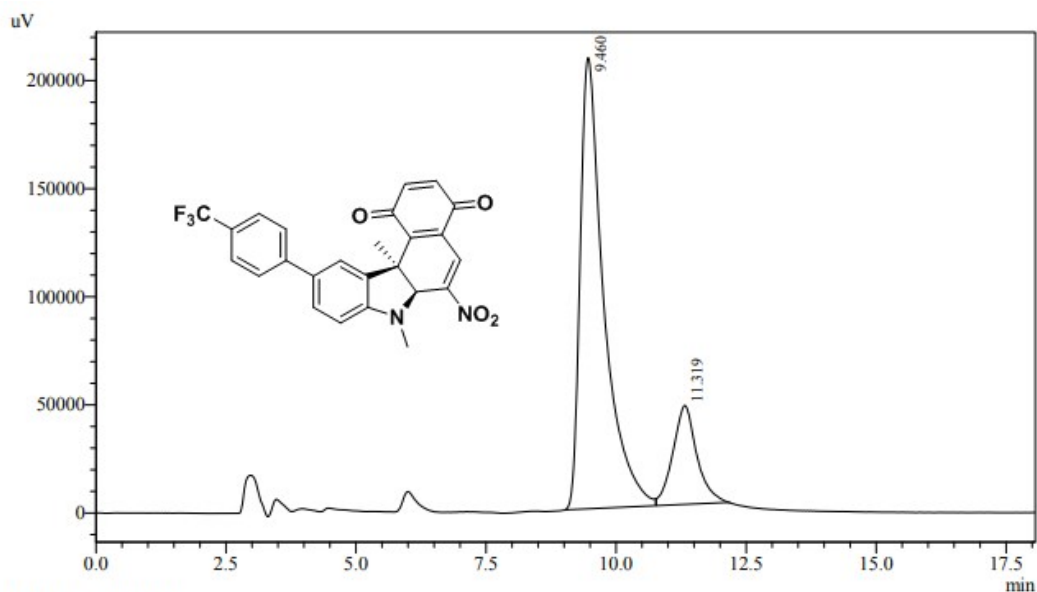

1 Det.A Ch1 / 254nm

Detector A Ch1 254nm

| Peak# | Ret. Time | Area    | Height | Area %  | Height % |
|-------|-----------|---------|--------|---------|----------|
| 1     | 9.460     | 6589508 | 208622 | 81.808  | 82.021   |
| 2     | 11.319    | 1465322 | 45729  | 18.192  | 17.979   |
| Total |           | 8054830 | 254351 | 100.000 | 100.000  |

9-(4-(trifluoromethyl)phenyl)-7,11-dimethyl-6-nitro-7,11-dihydro-1H-benzo[c]carbazole-1,4(6aH)-dione  
(3q)

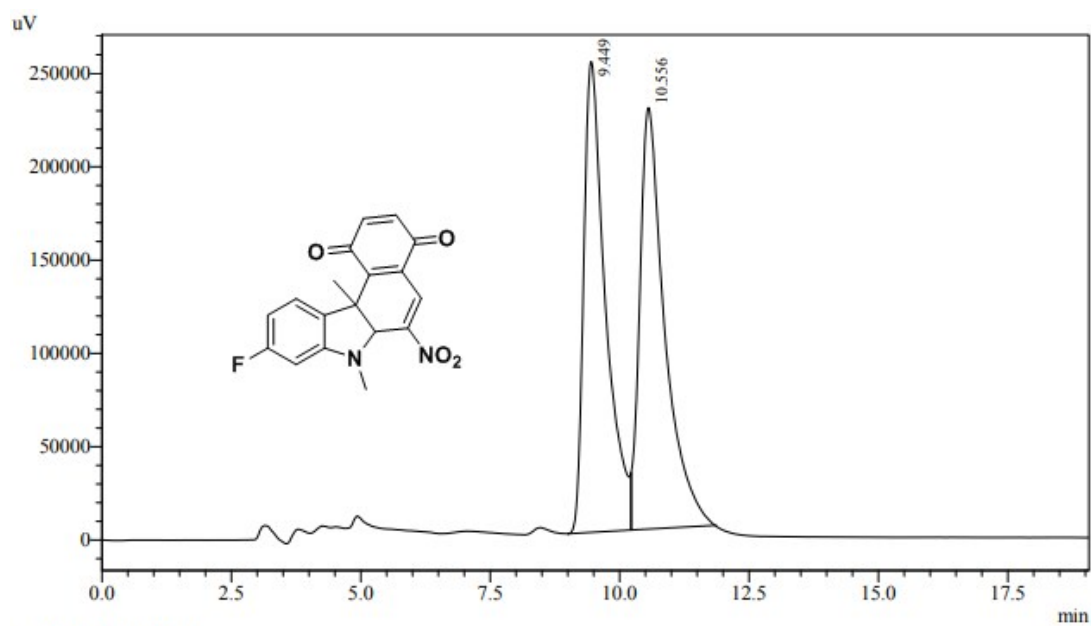

1 Det.A Ch1 / 254nm

Detector A Ch1 254nm

| Peak# | Ret. Time | Area     | Height | Area %  | Height % |
|-------|-----------|----------|--------|---------|----------|
| 1     | 9.449     | 7383225  | 252216 | 49.251  | 52.754   |
| 2     | 10.556    | 7607748  | 225880 | 50.749  | 47.246   |
| Total |           | 14990972 | 478095 | 100.000 | 100.000  |

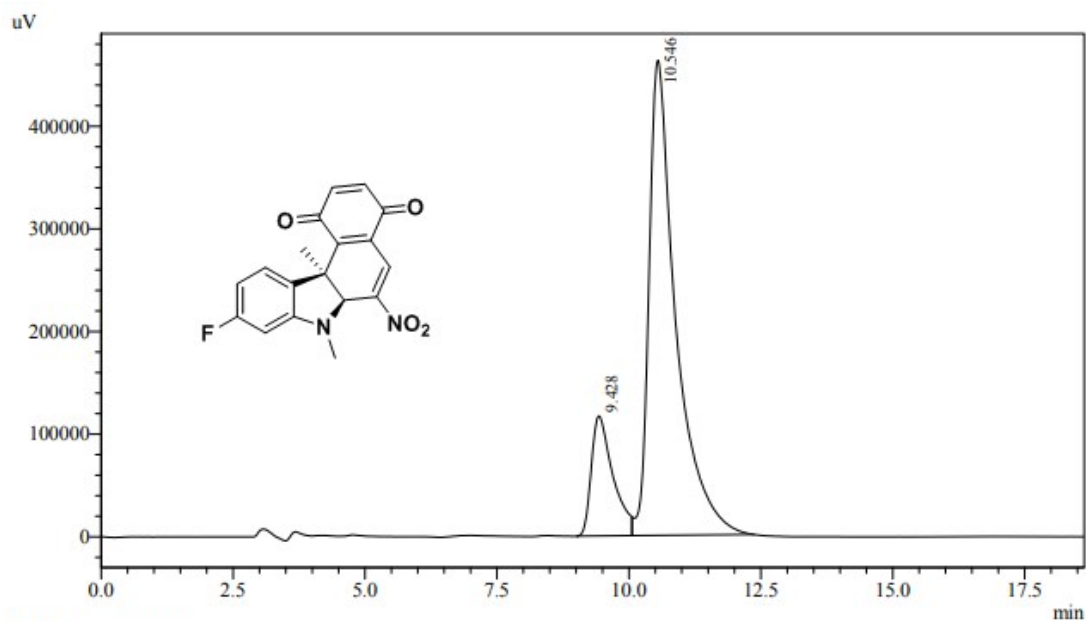

1 Det.A Ch1 / 254nm

Detector A Ch1 254nm

| Peak# | Ret. Time | Area     | Height | Area %  | Height % |
|-------|-----------|----------|--------|---------|----------|
| 1     | 9.428     | 3330852  | 116864 | 16.903  | 20.161   |
| 2     | 10.546    | 16375320 | 462780 | 83.097  | 79.839   |
| Total |           | 19706171 | 579643 | 100.000 | 100.000  |

9-chloro-7,11b-dimethyl-6-nitro-7,11b-dihydro-1H-benzo[c]carbazole-1,4(6aH)-dione (**3r**)

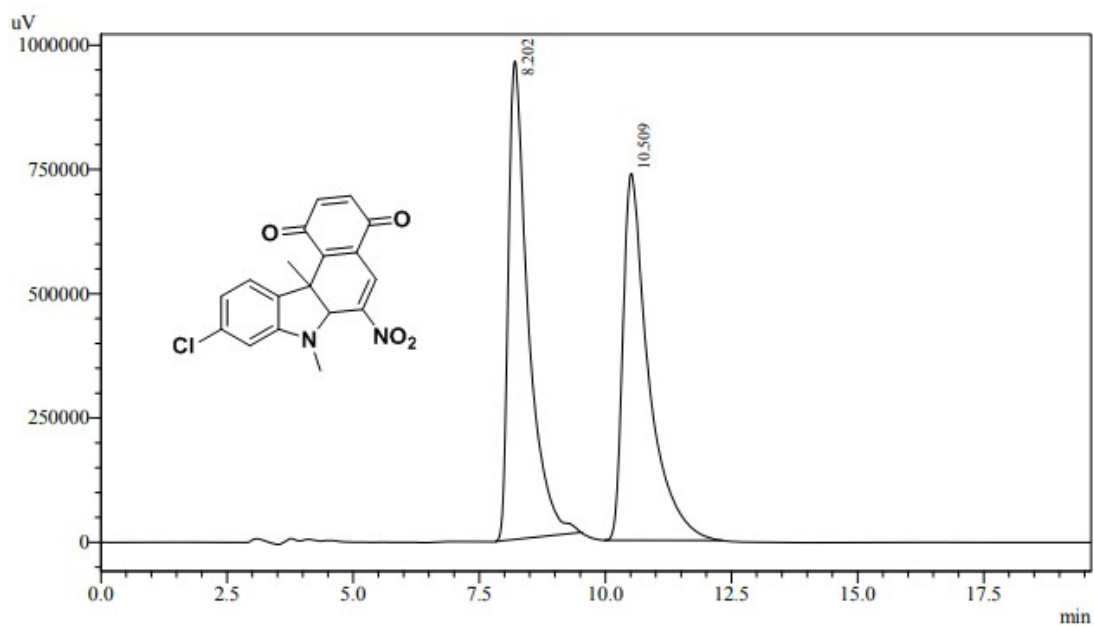

1 Det.A Ch1 / 254nm

Detector A Ch1 254nm

| Peak# | Ret. Time | Area     | Height  | Area %  | Height % |
|-------|-----------|----------|---------|---------|----------|
| 1     | 8.202     | 26341725 | 962118  | 50.260  | 56.589   |
| 2     | 10.509    | 26069668 | 738057  | 49.740  | 43.411   |
| Total |           | 52411393 | 1700175 | 100.000 | 100.000  |

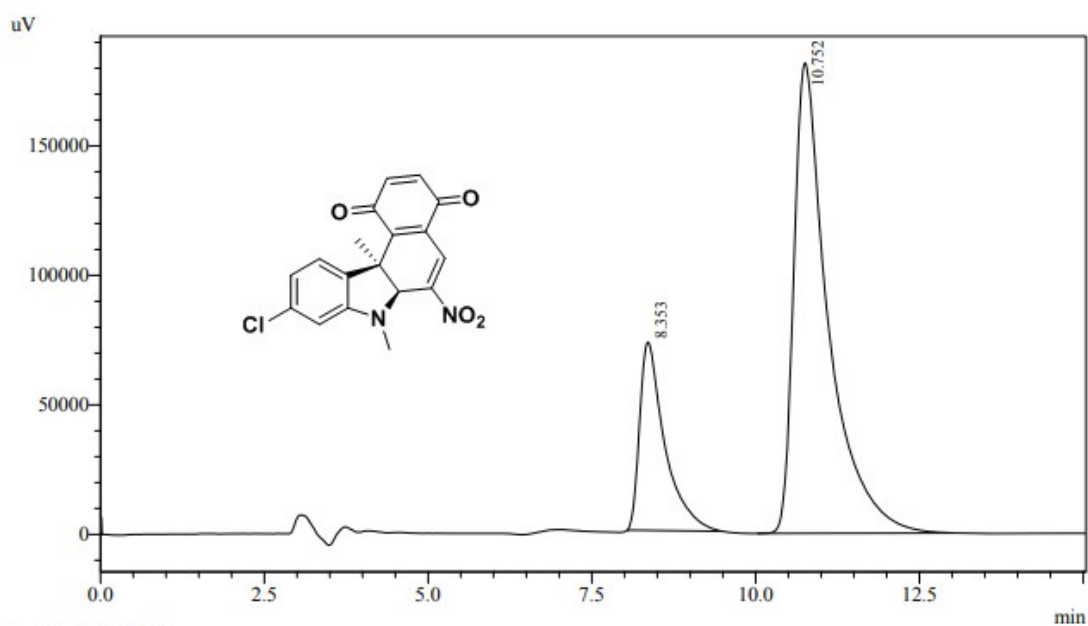

1 Det.A Ch1 / 254nm

Detector A Ch1 254nm

| Peak# | Ret. Time | Area    | Height | Area %  | Height % |
|-------|-----------|---------|--------|---------|----------|
| 1     | 8.353     | 1933202 | 72674  | 22.532  | 28.583   |
| 2     | 10.752    | 6646491 | 181578 | 77.468  | 71.417   |
| Total |           | 8579693 | 254252 | 100.000 | 100.000  |

7,9,11b-trimethyl-6-nitro-7,11b-dihydro-1H-benzo[c]carbazole-1,4(6aH)-dione (**3s**)

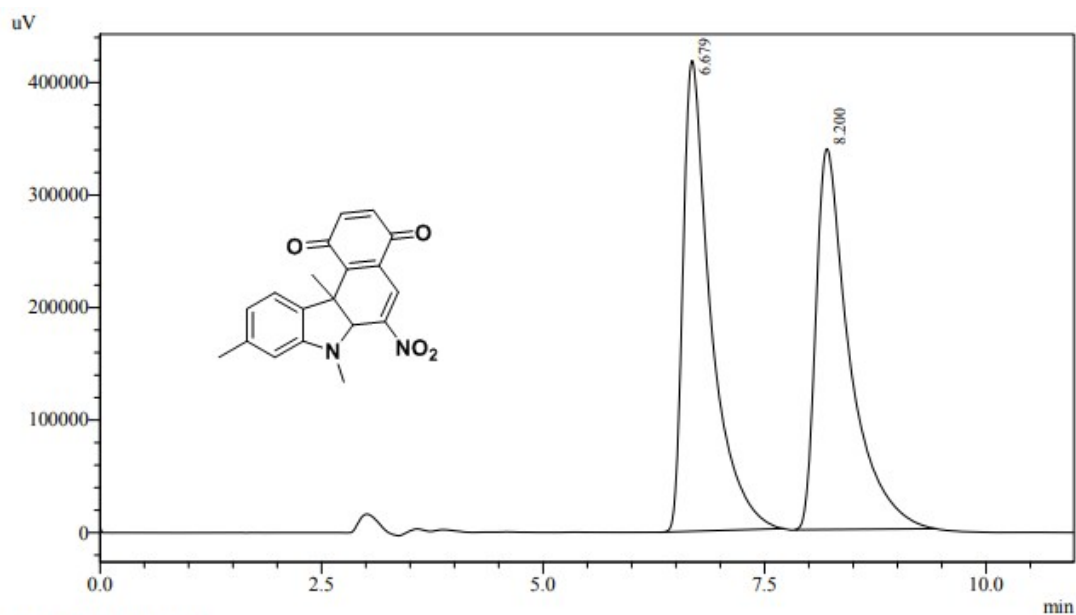

1 Det.A Ch1 / 254nm

Detector A Ch1 254nm

| Peak# | Ret. Time | Area     | Height | Area %  | Height % |
|-------|-----------|----------|--------|---------|----------|
| 1     | 6.679     | 9103044  | 418241 | 50.472  | 55.283   |
| 2     | 8.200     | 8932742  | 338303 | 49.528  | 44.717   |
| Total |           | 18035786 | 756544 | 100.000 | 100.000  |

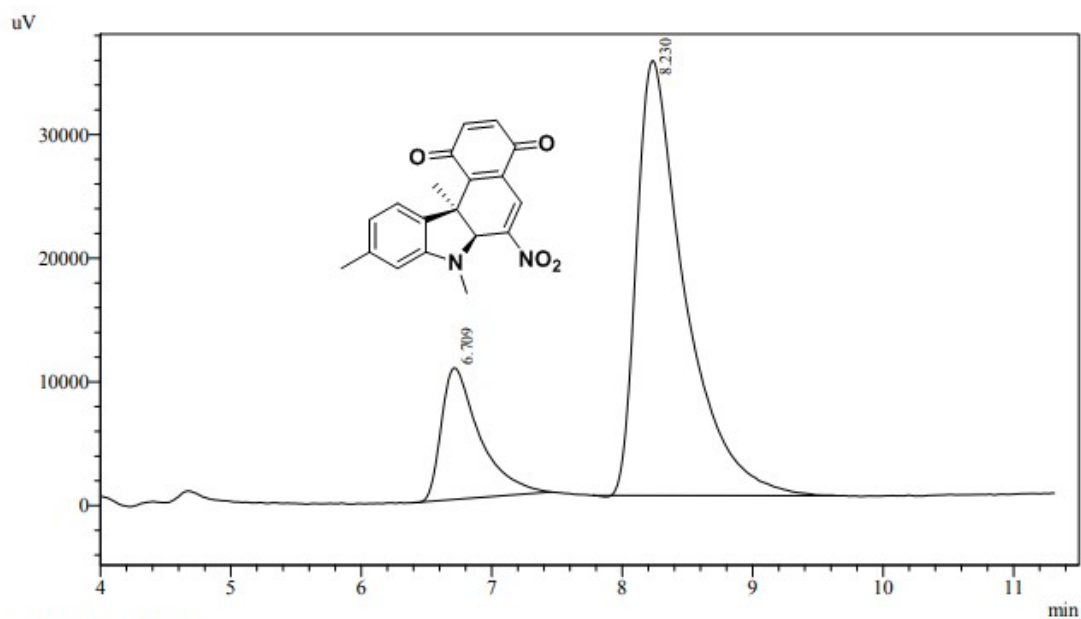

1 Det.A Ch1 / 254nm

Detector A Ch1 254nm

| Peak# | Ret. Time | Area    | Height | Area %  | Height % |
|-------|-----------|---------|--------|---------|----------|
| 1     | 6.709     | 216509  | 10630  | 19.326  | 23.217   |
| 2     | 8.230     | 903801  | 35155  | 80.674  | 76.783   |
| Total |           | 1120311 | 45785  | 100.000 | 100.000  |

10-(4-methoxyphenyl)-7,11b-dimethyl-6-nitro-6a,11b-dihydro-7H-benzo[c]carbazole-1,4-diol (4)

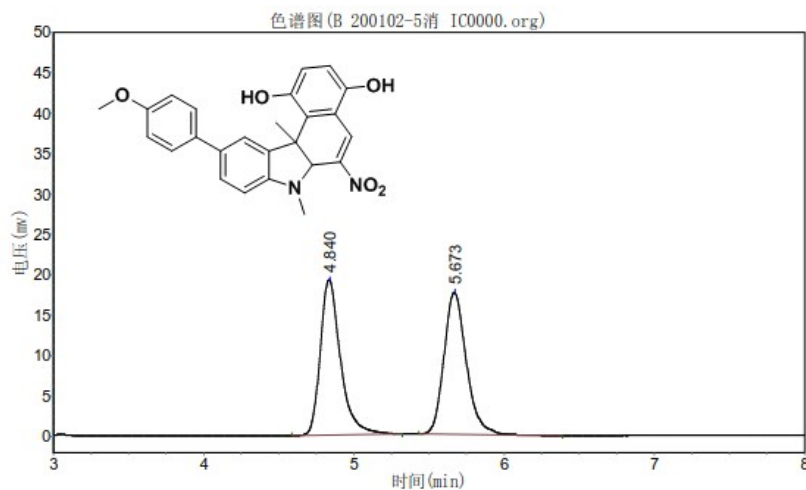

分析结果表

| 峰号 | 峰名 | 保留时间  | 峰高        | 峰面积        | 含量       |
|----|----|-------|-----------|------------|----------|
| 1  |    | 4.840 | 19119.227 | 179243.406 | 49.6302  |
| 2  |    | 5.673 | 17515.322 | 181914.297 | 50.3698  |
| 总计 |    |       | 36634.549 | 361157.703 | 100.0000 |

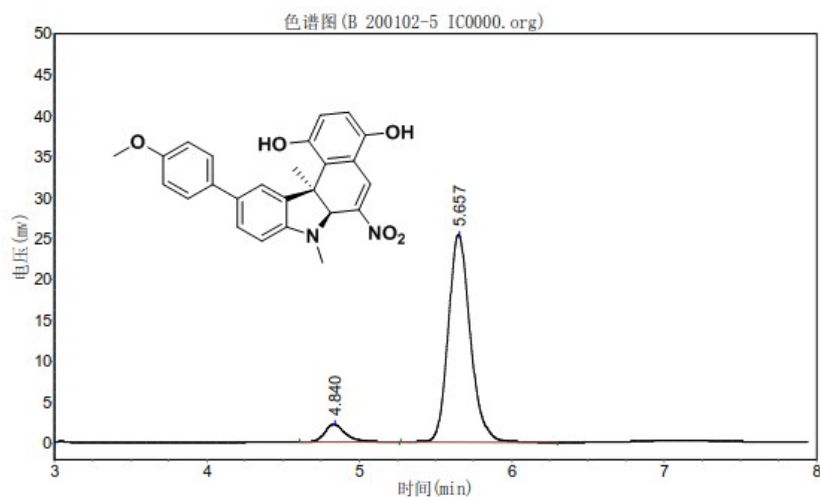

分析结果表

| 峰号 | 峰名 | 保留时间  | 峰高        | 峰面积        | 含量       |
|----|----|-------|-----------|------------|----------|
| 1  |    | 4.840 | 2121.899  | 19954.449  | 7.2894   |
| 2  |    | 5.657 | 25287.219 | 253790.500 | 92.7106  |
| 总计 |    |       | 27409.117 | 273744.949 | 100.0000 |

## Crystal data and structure of (7*R*, 11*bR*)-3a

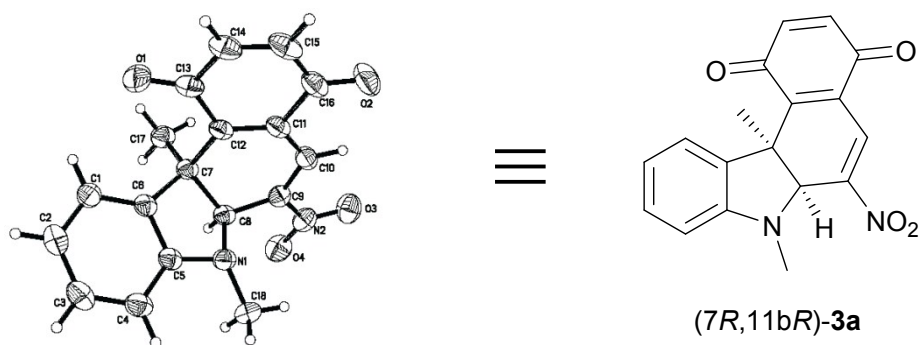

**Table 1 Crystal data and structure refinement for 20190366.**

|                                    |                                                               |
|------------------------------------|---------------------------------------------------------------|
| Identification code                | 20190366                                                      |
| Empirical formula                  | C <sub>18</sub> H <sub>14</sub> N <sub>2</sub> O <sub>4</sub> |
| Formula weight                     | 322.31                                                        |
| Temperature/K                      | 293(2)                                                        |
| Crystal system                     | orthorhombic                                                  |
| Space group                        | P2 <sub>1</sub> 2 <sub>1</sub> 2 <sub>1</sub>                 |
| a/Å                                | 8.8208(5)                                                     |
| b/Å                                | 11.9769(12)                                                   |
| c/Å                                | 14.7126(9)                                                    |
| α/°                                | 90                                                            |
| β/°                                | 90                                                            |
| γ/°                                | 90                                                            |
| Volume/Å <sup>3</sup>              | 1554.3(2)                                                     |
| Z                                  | 4                                                             |
| ρ <sub>calc</sub> /cm <sup>3</sup> | 1.377                                                         |
| μ/mm <sup>-1</sup>                 | 0.821                                                         |
| F(000)                             | 672.0                                                         |
| Crystal size/mm <sup>3</sup>       | 0.21 × 0.15 × 0.13                                            |
| Radiation                          | CuKα (λ = 1.54184)                                            |
| 2θ range for data collection/°     | 9.522 to 141.864                                              |
| Index ranges                       | -6 ≤ h ≤ 10, -13 ≤ k ≤ 14, -17 ≤ l ≤ 17                       |
| Reflections collected              | 5902                                                          |
| Independent reflections            | 2927 [R <sub>int</sub> = 0.0251, R <sub>sigma</sub> = 0.0336] |
| Data/restraints/parameters         | 2927/0/219                                                    |

|                                                |                                  |
|------------------------------------------------|----------------------------------|
| Goodness-of-fit on $F^2$                       | 1.033                            |
| Final R indexes [ $I \geq 2\sigma(I)$ ]        | $R_1 = 0.0434$ , $wR_2 = 0.1111$ |
| Final R indexes [all data]                     | $R_1 = 0.0493$ , $wR_2 = 0.1181$ |
| Largest diff. peak/hole / $e \text{ \AA}^{-3}$ | 0.13/-0.18                       |
| Flack parameter                                | -0.1(2)                          |

**Table 2 Fractional Atomic Coordinates ( $\times 10^4$ ) and Equivalent Isotropic Displacement Parameters ( $\text{\AA}^2 \times 10^3$ ) for 20190366.  $U_{eq}$  is defined as 1/3 of the trace of the orthogonalised  $U_{ij}$  tensor.**

| Atom | $x$     | $y$     | $z$        | $U(eq)$  |
|------|---------|---------|------------|----------|
| C1   | 3616(3) | 3537(3) | 6803(2)    | 56.7(7)  |
| C2   | 2777(4) | 2567(3) | 6692(3)    | 66.1(9)  |
| C3   | 2337(4) | 2218(3) | 5836(3)    | 70.3(9)  |
| C4   | 2729(4) | 2820(3) | 5069(2)    | 62.8(8)  |
| C5   | 3575(3) | 3791(3) | 5177(2)    | 49.0(6)  |
| C6   | 4018(3) | 4148(2) | 6041(2)    | 46.7(6)  |
| C7   | 4857(3) | 5258(2) | 5944.1(19) | 45.2(6)  |
| C8   | 4276(3) | 5610(2) | 4983.4(19) | 46.0(6)  |
| C9   | 5362(3) | 6345(3) | 4490(2)    | 50.3(6)  |
| C10  | 6853(3) | 6258(3) | 4586(2)    | 55.2(7)  |
| C11  | 7461(3) | 5515(3) | 5274(2)    | 51.9(7)  |
| C12  | 6580(3) | 5075(2) | 5930(2)    | 48.5(6)  |
| C13  | 7317(4) | 4495(3) | 6707(2)    | 62.2(8)  |
| C14  | 8943(4) | 4219(3) | 6625(3)    | 72.5(10) |
| C15  | 9785(4) | 4622(4) | 5968(3)    | 75.6(11) |
| C16  | 9147(4) | 5355(3) | 5278(3)    | 64.9(9)  |
| C17  | 4456(4) | 6144(3) | 6661(2)    | 59.2(8)  |
| C18  | 3272(4) | 4547(3) | 3638(2)    | 68.9(9)  |
| N1   | 4065(3) | 4533(2) | 4513.1(16) | 50.5(6)  |
| N2   | 4743(4) | 7175(2) | 3859.0(19) | 62.2(7)  |
| O1   | 6638(3) | 4271(3) | 7401.8(18) | 89.2(10) |
| O2   | 9936(3) | 5836(3) | 4718(2)    | 90.1(9)  |
| O3   | 5616(4) | 7719(2) | 3395(2)    | 85.6(8)  |
| O4   | 3359(3) | 7288(2) | 3843.0(18) | 79.7(8)  |

**Table 3 Anisotropic Displacement Parameters ( $\text{\AA}^2 \times 10^3$ ) for 20190366. The Anisotropic displacement factor exponent takes the form: -  $2\pi^2[h^2a^2U_{11}+2hka*b*U_{12}+\dots]$ .**

| Atom | $U_{11}$ | $U_{22}$ | $U_{33}$ | $U_{23}$  | $U_{13}$  | $U_{12}$ |
|------|----------|----------|----------|-----------|-----------|----------|
| C1   | 47.4(16) | 65.9(19) | 56.9(16) | 1.3(15)   | 0.7(13)   | 3.3(14)  |
| C2   | 58.8(18) | 60.1(19) | 79(2)    | 9.1(16)   | 11.8(18)  | 0.1(15)  |
| C3   | 60.8(19) | 55.4(18) | 95(3)    | -9.4(19)  | 12(2)     | -9.2(16) |
| C4   | 55.1(17) | 63.3(19) | 70.2(19) | -17.4(17) | 0.0(16)   | -5.1(16) |
| C5   | 36.9(12) | 53.6(15) | 56.6(15) | -8.4(13)  | 1.3(11)   | 3.5(12)  |
| C6   | 31.4(11) | 53.8(14) | 55.1(15) | -4.0(13)  | 0.9(12)   | 5.9(12)  |
| C7   | 34.7(12) | 52.7(15) | 48.2(14) | -4.7(12)  | -2.1(11)  | 3.8(11)  |
| C8   | 36.1(12) | 52.2(15) | 49.9(14) | -6.2(12)  | -2.9(11)  | 7.1(11)  |
| C9   | 53.1(16) | 48.3(14) | 49.3(14) | -4.5(12)  | 0.1(12)   | 5.4(13)  |
| C10  | 49.9(16) | 56.3(16) | 59.5(16) | -6.0(14)  | 7.2(13)   | -6.8(14) |
| C11  | 37.9(13) | 54.3(15) | 63.4(17) | -10.2(14) | -0.9(13)  | -1.6(12) |
| C12  | 36.3(13) | 53.1(15) | 56.3(15) | -10.1(13) | -4.9(13)  | -0.2(12) |
| C13  | 45.8(16) | 71(2)    | 70.0(19) | -1.9(17)  | -15.0(16) | -1.4(16) |
| C14  | 45.5(17) | 79(2)    | 93(2)    | 0(2)      | -19.5(18) | 3.4(17)  |
| C15  | 36.3(15) | 81(2)    | 109(3)   | -12(2)    | -10.8(19) | 7.5(16)  |
| C16  | 40.3(15) | 70(2)    | 84(2)    | -15.1(18) | 6.0(16)   | -3.0(15) |
| C17  | 55.1(16) | 64.9(19) | 57.4(16) | -14.2(15) | 0.7(14)   | 3.5(15)  |
| C18  | 74(2)    | 81(2)    | 51.6(17) | -10.0(16) | -10.0(16) | -8(2)    |
| N1   | 43.8(12) | 58.0(14) | 49.6(12) | -8.4(11)  | -2.0(10)  | 0.7(12)  |
| N2   | 76.5(19) | 54.6(14) | 55.5(14) | -3.9(13)  | 0.5(14)   | 8.5(14)  |
| O1   | 60.5(14) | 138(3)   | 69.4(15) | 26.2(17)  | -12.5(13) | 2.5(17)  |
| O2   | 47.9(13) | 114(2)   | 108(2)   | 0.5(19)   | 20.0(14)  | -6.3(15) |
| O3   | 104(2)   | 72.0(16) | 80.5(17) | 19.3(14)  | 9.7(16)   | -1.1(17) |
| O4   | 77.1(17) | 85.8(18) | 76.1(16) | 9.9(15)   | -9.0(14)  | 24.2(15) |

**Table 4 Bond Lengths for 20190366.**

| Atom | Atom | Length/ $\text{\AA}$ | Atom | Atom | Length/ $\text{\AA}$ |
|------|------|----------------------|------|------|----------------------|
| C1   | C2   | 1.387(5)             | C9   | N2   | 1.465(4)             |
| C1   | C6   | 1.384(4)             | C10  | C11  | 1.449(5)             |



|    |     |          |     |     |          |
|----|-----|----------|-----|-----|----------|
| C2 | C3  | 1.383(6) | C11 | C12 | 1.347(4) |
| C3 | C4  | 1.383(5) | C11 | C16 | 1.499(4) |
| C4 | C5  | 1.391(4) | C12 | C13 | 1.488(4) |
| C5 | C6  | 1.397(4) | C13 | C14 | 1.476(5) |
| C5 | N1  | 1.389(4) | C13 | O1  | 1.215(4) |
| C6 | C7  | 1.529(4) | C14 | C15 | 1.311(6) |
| C7 | C8  | 1.561(4) | C15 | C16 | 1.456(6) |
| C7 | C12 | 1.536(4) | C16 | O2  | 1.222(5) |
| C7 | C17 | 1.537(4) | C18 | N1  | 1.466(4) |
| C8 | C9  | 1.490(4) | N2  | O3  | 1.219(4) |
| C8 | N1  | 1.475(4) | N2  | O4  | 1.228(4) |
| C9 | C10 | 1.327(4) |     |     |          |

**Table 5 Bond Angles for 20190366.**

| Atom | Atom | Atom | Angle/°  | Atom | Atom | Atom |
|------|------|------|----------|------|------|------|
| C6   | C1   | C2   | 118.9(3) | C9   | C10  | C11  |
| C3   | C2   | C1   | 120.6(3) | C10  | C11  | C16  |
| C4   | C3   | C2   | 121.0(3) | C12  | C11  | C10  |
| C3   | C4   | C5   | 118.5(3) | C12  | C11  | C16  |
| C4   | C5   | C6   | 120.6(3) | C11  | C12  | C7   |
| N1   | C5   | C4   | 128.4(3) | C11  | C12  | C13  |
| N1   | C5   | C6   | 110.9(3) | C13  | C12  | C7   |
| C1   | C6   | C5   | 120.3(3) | C14  | C13  | C12  |
| C1   | C6   | C7   | 131.2(3) | O1   | C13  | C12  |
| C5   | C6   | C7   | 108.4(3) | O1   | C13  | C14  |
| C6   | C7   | C8   | 99.2(2)  | C15  | C14  | C13  |
| C6   | C7   | C12  | 110.9(2) | C14  | C15  | C16  |
| C6   | C7   | C17  | 115.2(2) | C15  | C16  | C11  |
| C12  | C7   | C8   | 110.5(2) | O2   | C16  | C11  |
| C12  | C7   | C17  | 109.6(2) | O2   | C16  | C15  |
| C17  | C7   | C8   | 111.1(2) | C5   | N1   | C8   |
| C9   | C8   | C7   | 112.9(2) | C5   | N1   | C18  |

|     |    |    |          |     |    |    |
|-----|----|----|----------|-----|----|----|
| N1  | C8 | C7 | 103.3(2) | C18 | N1 | C8 |
| N1  | C8 | C9 | 111.7(2) | O3  | N2 | C9 |
| C10 | C9 | C8 | 122.6(3) | O3  | N2 | O4 |
| C10 | C9 | N2 | 119.4(3) | O4  | N2 | C9 |
| N2  | C9 | C8 | 118.0(3) |     |    |    |

**Table 6 Torsion Angles for 20190366.**

| A  | B  | C   | D   | Angle/°   | A   | B   | C   | D   | Angle/°   |
|----|----|-----|-----|-----------|-----|-----|-----|-----|-----------|
| C1 | C2 | C3  | C4  | 0.5(6)    | C8  | C9  | N2  | O4  | 7.1(4)    |
| C1 | C6 | C7  | C8  | -157.5(3) | C9  | C8  | N1  | C5  | 156.6(2)  |
| C1 | C6 | C7  | C12 | 86.2(4)   | C9  | C8  | N1  | C18 | -68.7(3)  |
| C1 | C6 | C7  | C17 | -38.9(4)  | C9  | C10 | C11 | C12 | -13.0(5)  |
| C2 | C1 | C6  | C5  | 0.3(4)    | C9  | C10 | C11 | C16 | 173.3(3)  |
| C2 | C1 | C6  | C7  | 176.7(3)  | C10 | C9  | N2  | O3  | 4.5(5)    |
| C2 | C3 | C4  | C5  | -0.3(5)   | C10 | C9  | N2  | O4  | -174.5(3) |
| C3 | C4 | C5  | C6  | 0.1(5)    | C10 | C11 | C12 | C7  | 5.1(4)    |
| C3 | C4 | C5  | N1  | -178.5(3) | C10 | C11 | C12 | C13 | -168.8(3) |
| C4 | C5 | C6  | C1  | -0.1(4)   | C10 | C11 | C16 | C15 | 179.4(3)  |
| C4 | C5 | C6  | C7  | -177.3(3) | C10 | C11 | C16 | O2  | -0.3(5)   |
| C4 | C5 | N1  | C8  | 155.3(3)  | C11 | C12 | C13 | C14 | -12.8(5)  |
| C4 | C5 | N1  | C18 | 21.0(5)   | C11 | C12 | C13 | O1  | 165.5(4)  |
| C5 | C6 | C7  | C8  | 19.2(3)   | C12 | C7  | C8  | C9  | -36.3(3)  |
| C5 | C6 | C7  | C12 | -97.0(3)  | C12 | C7  | C8  | N1  | 84.6(3)   |
| C5 | C6 | C7  | C17 | 137.8(3)  | C12 | C11 | C16 | C15 | 5.6(5)    |
| C6 | C1 | C2  | C3  | -0.5(5)   | C12 | C11 | C16 | O2  | -174.1(3) |
| C6 | C5 | N1  | C8  | -23.4(3)  | C12 | C13 | C14 | C15 | 11.1(6)   |
| C6 | C5 | N1  | C18 | -157.7(3) | C13 | C14 | C15 | C16 | -0.8(6)   |
| C6 | C7 | C8  | C9  | -152.8(2) | C14 | C15 | C16 | C11 | -7.7(6)   |
| C6 | C7 | C8  | N1  | -32.0(2)  | C14 | C15 | C16 | O2  | 171.9(4)  |
| C6 | C7 | C12 | C11 | 128.9(3)  | C16 | C11 | C12 | C7  | 178.5(3)  |
| C6 | C7 | C12 | C13 | -57.3(3)  | C16 | C11 | C12 | C13 | 4.6(4)    |
| C7 | C8 | C9  | C10 | 32.7(4)   | C17 | C7  | C8  | C9  | 85.6(3)   |
| C7 | C8 | C9  | N2  | -148.8(3) | C17 | C7  | C8  | N1  | -153.6(2) |
| C7 | C8 | N1  | C5  | 34.9(3)   | C17 | C7  | C12 | C11 | -102.9(3) |
| C7 | C8 | N1  | C18 | 169.6(2)  | C17 | C7  | C12 | C13 | 70.9(4)   |

|    |     |     |     |           |    |     |     |     |           |
|----|-----|-----|-----|-----------|----|-----|-----|-----|-----------|
| C7 | C12 | C13 | C14 | 173.2(3)  | N1 | C5  | C6  | C1  | 178.7(3)  |
| C7 | C12 | C13 | O1  | -8.6(5)   | N1 | C5  | C6  | C7  | 1.5(3)    |
| C8 | C7  | C12 | C11 | 19.8(4)   | N1 | C8  | C9  | C10 | -83.2(4)  |
| C8 | C7  | C12 | C13 | -166.3(3) | N1 | C8  | C9  | N2  | 95.2(3)   |
| C8 | C9  | C10 | C11 | -7.6(5)   | N2 | C9  | C10 | C11 | 174.1(3)  |
| C8 | C9  | N2  | O3  | -174.0(3) | O1 | C13 | C14 | C15 | -167.2(4) |

**Table 7 Hydrogen Atom Coordinates ( $\text{\AA}\times 10^4$ ) and Isotropic Displacement Parameters ( $\text{\AA}^2\times 10^3$ ) for 20190366.**

| Atom | <i>x</i> | <i>y</i> | <i>z</i> | U(eq) |
|------|----------|----------|----------|-------|
| H1   | 3905     | 3774     | 7380     | 68    |
| H2   | 2508     | 2148     | 7199     | 79    |
| H3   | 1767     | 1569     | 5775     | 84    |
| H4   | 2435     | 2581     | 4494     | 75    |
| H8   | 3297     | 5989     | 5042     | 55    |
| H10  | 7501     | 6669     | 4217     | 66    |
| H14  | 9381     | 3746     | 7052     | 87    |
| H15  | 10808    | 4436     | 5943     | 91    |
| H17A | 4912     | 6843     | 6497     | 89    |
| H17B | 4831     | 5911     | 7243     | 89    |
| H17C | 3375     | 6230     | 6690     | 89    |
| H18A | 2234     | 4759     | 3730     | 103   |
| H18B | 3312     | 3817     | 3369     | 103   |
| H18C | 3752     | 5076     | 3240     | 103   |
